# Supplementary material for: Evaluated kinetic and photochemical data for atmospheric chemistry: Volume VII – Criegee intermediates
Source: Copernicus journal article supplement (doi:10.5194/acp-20-13497-2020), 2020-11-12
Supplement: Supplementary file 1 [file acp-20-13497-2020-supplement.zip]

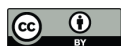

## *Supplement of*

# **Evaluated kinetic and photochemical data for atmospheric chemistry: Volume VII – Criegee intermediates**

**R. Anthony Cox et al.**

*Correspondence to:* Michael E. Jenkin ([atmos.chem@btinternet.com](mailto:atmos.chem@btinternet.com)), John N. Crowley ([john.crowley@mpic.de](mailto:john.crowley@mpic.de)),  
and R. Anthony Cox ([rac26@cam.ac.uk](mailto:rac26@cam.ac.uk))

- [acp-20-13497-2020-supplement-title-page.pdf](#)
- [Supplement A - alkene + ozone reactions.pdf](#)
- [Supplement B - sCI reactions.pdf](#)
- [Supplement C - ambient calculations.pdf](#)

The copyright of individual parts of the supplement might differ from the CC BY 4.0 License.
