# Supplementary material for: Evaluated kinetic and photochemical data for atmospheric chemistry: Volume VII – Criegee intermediates
Source: Copernicus journal article supplement (doi:10.5194/acp-20-13497-2020), 2020-11-12
Supplement: Supplementary file 3 [file acp-20-13497-2020-supplement.zip]

## Supplement A to “Evaluated kinetic and photochemical data for atmospheric chemistry: Volume VII - Criegee intermediates”:

Detailed data sheets for the reactions of O<sub>3</sub> with alkenes, prepared by the IUPAC Task Group on Atmospheric Chemical Kinetic Data Evaluation. The data sheets are also available at <http://iupac.pole-ether.fr/> (access date: September 2020), where a guide to data sheet format and evaluation methods is also provided.

---

### Contents

|                                                                          |           |
|--------------------------------------------------------------------------|-----------|
| <b>A1. Data sheets for reactions of O<sub>3</sub> with small alkenes</b> | <b>1</b>  |
| Ox_VOC5: ethene                                                          | 1         |
| Ox_VOC6: propene                                                         | 6         |
| Ox_VOC16: but-1-ene                                                      | 10        |
| Ox_VOC17: <i>cis</i> -but-2-ene                                          | 14        |
| Ox_VOC18: <i>trans</i> -but-2-ene                                        | 18        |
| Ox_VOC15: 2-methylpropene                                                | 23        |
| Ox_VOC41: 2,3-dimethylbut-2-ene                                          | 28        |
| Ox_VOC7: isoprene                                                        | 32        |
| <b>A2. Data sheets for reactions of O<sub>3</sub> with monoterpenes</b>  | <b>38</b> |
| Ox_VOC8: α-pinene                                                        | 38        |
| Ox_VOC19: β-pinene                                                       | 43        |
| Ox_VOC20: limonene                                                       | 48        |
| Ox_VOC21: camphene                                                       | 53        |
| Ox_VOC22: 2-carene                                                       | 56        |
| Ox_VOC23: 3-carene                                                       | 58        |
| Ox_VOC24: β-myrcene                                                      | 61        |
| Ox_VOC25: β-ocimene                                                      | 65        |
| Ox_VOC26: α-phellandrene                                                 | 69        |
| Ox_VOC27: β-phellandrene                                                 | 71        |
| Ox_VOC28: sabinene                                                       | 73        |
| Ox_VOC29: α-terpinene                                                    | 76        |
| Ox_VOC30: γ-terpinene                                                    | 78        |
| Ox_VOC31: terpinolene                                                    | 80        |

|                                                                           |            |
|---------------------------------------------------------------------------|------------|
| <b>A3. Data sheets for reactions of O<sub>3</sub> with sesquiterpenes</b> | <b>83</b>  |
| Ox_VOC32: β-caryophyllene                                                 | 83         |
| Ox_VOC33: α-cedrene                                                       | 87         |
| Ox_VOC34: α-copaene                                                       | 90         |
| Ox_VOC35: α-farnesene                                                     | 92         |
| Ox_VOC36: β-farnesene                                                     | 94         |
| Ox_VOC37: α-humulene                                                      | 97         |
| Ox_VOC38: isolongifolene                                                  | 100        |
| Ox_VOC39: longifolene                                                     | 102        |
| Ox_VOC40: valencene                                                       | 103        |
| <b>A4. Abbreviations used in data sheets</b>                              | <b>104</b> |

---

## A1. Data sheets for reactions of O<sub>3</sub> with small alkenes

### Ox\_VOC5: ethene

Last evaluated: August 2020; Last change in preferred values: June 2018

#### O<sub>3</sub> + C<sub>2</sub>H<sub>4</sub> → products

##### Rate coefficient data

| $k/\text{cm}^3 \text{ molecule}^{-1} \text{ s}^{-1}$ | Temp./K | Reference                | Technique/ Comments  |
|------------------------------------------------------|---------|--------------------------|----------------------|
| <i>Absolute Rate Coefficients</i>                    |         |                          |                      |
| $3.3 \times 10^{-15} \exp[-(2365 \pm 101)/T]$        | 178-233 | DeMore, 1969             | S-UVA (a)            |
| $1.18 \times 10^{-18}$                               | 298*    |                          |                      |
| $(1.55 \pm 0.15) \times 10^{-18}$                    | 299     | Stedman et al., 1973     | S-CL/GC-FID (a)      |
| $9.0 \times 10^{-15} \exp[-(2557 \pm 167)/T]$        | 235-362 | Herron and Huie, 1974    | MS/MS (a)            |
| $1.69 \times 10^{-18}$                               | 298*    |                          |                      |
| $(1.9 \pm 0.1) \times 10^{-18}$                      | 299     | Japar et al., 1974, 1976 | S-CL/GC-FID (a)      |
| $(1.69 \pm 0.13) \times 10^{-18}$                    | 303     | Toby et al., 1976        | S-UVA (a)            |
| $4.4 \times 10^{-19}$                                | 260     | Adeniji et al., 1981     | S-CL/GC-FID (a)      |
| $1.6 \times 10^{-18}$                                | 294     |                          |                      |
| $(1.43 \pm 0.19) \times 10^{-18}$                    | 296     | Atkinson et al., 1982    | S-CL/GC-FID (a)      |
| $7.72 \times 10^{-15} \exp[-(2557 \pm 30)/T]$        | 232-298 | Bahta et al., 1984       | S-UVA (a)            |
| $(1.45 \pm 0.10) \times 10^{-18}$                    | 298     |                          |                      |
| $5.1 \times 10^{-15} \exp[-(2446 \pm 91)/T]$         | 240-324 | Treacy et al., 1992      | S-CL (a)             |
| $(1.37 \pm 0.08) \times 10^{-18}$                    | 298     |                          |                      |
| $1.44 \times 10^{-18}$                               | 298     | Qi et al., 2006          | S-FTIR (a)           |
| $(1.46 \pm 0.13) \times 10^{-18}$                    | 296     | Søndergaard et al., 2007 | S-FTIR (b)           |
| $(1.35 \pm 0.11) \times 10^{-18}$                    | 298     | Wang et al., 2007        | S-UVA (a)            |
| $(1.72 \pm 0.35) \times 10^{-18}$                    | 298     | Wegener et al., 2007     | S-UVA/GC-FID (c),(d) |
| $(1.45 \pm 0.25) \times 10^{-18}$                    | 298     | Alam et al., 2011        | S-UVA/FTIR (c),(e)   |

##### Comments

- (a)  $k$  determined from the observed first-order rate of ozone decay (measured by the first technique shown) in the presence of known excess concentrations of ethene (measured either by the second technique shown, or with the initial concentration determined by quantified dilution of the pure gas).
- (b)  $k$  determined from the observed first-order rate of ethene decay in the presence of known excess concentrations of ozone, with both reagents measured by FTIR. Cyclohexane added to scavenge HO radicals.
- (c) Experiments carried out with comparable concentrations of each reagent, in the presence of an HO radical scavenger. The system was simulated using an explicit chemical mechanism, with  $k$  optimized to recreate the observed decays in the concentrations of ozone (measured by the first technique shown) and ethene (measured by the second technique shown).
- (d) CO added to scavenge HO radicals.
- (e) Either CO or cyclohexane added to scavenge HO radicals.

## Preferred Values

| Parameter                                              | Value                                | T/K     |
|--------------------------------------------------------|--------------------------------------|---------|
| $k / \text{cm}^3 \text{ molecule}^{-1} \text{ s}^{-1}$ | $1.55 \times 10^{-18}$               | 298     |
| $k / \text{cm}^3 \text{ molecule}^{-1} \text{ s}^{-1}$ | $6.82 \times 10^{-15} \exp(-2500/T)$ | 180-360 |
| <i>Reliability</i>                                     |                                      |         |
| $\Delta \log k$                                        | $\pm 0.08$                           | 298     |
| $\Delta E/R$                                           | $\pm 100$                            | 180-360 |

### Comments on Preferred Values

The absolute kinetics determinations are in generally good agreement, with consistent values of the temperature coefficient ( $E/R$ ) reported in a number of studies covering a wide combined temperature range. The preferred value of  $E/R$  is a rounded average of those reported by DeMore (1969), Herron and Huie (1974), Bahta et al. (1984) and Treacy et al. (1992). The preferred 298 K rate coefficient is an average of the room temperature determinations reported in all the studies tabulated above, corrected to 298 K, where necessary, using the preferred value of  $E/R$ . Note that the 298 K value tabulated here for DeMore et al. (1969) was obtained by extrapolation from the studied temperature range, and was not included in the average.

It is well established that the reaction proceeds by initial addition of  $\text{O}_3$  to form an energy-rich “primary ozonide (POZ)” which rapidly decomposes to form an (excited) Criegee intermediate,  $[\text{CH}_2\text{OO}]^*$  (CI), and formaldehyde,  $\text{HCHO}$  (e.g. Johnson and Marston, 2008), as represented in the schematic shown below:

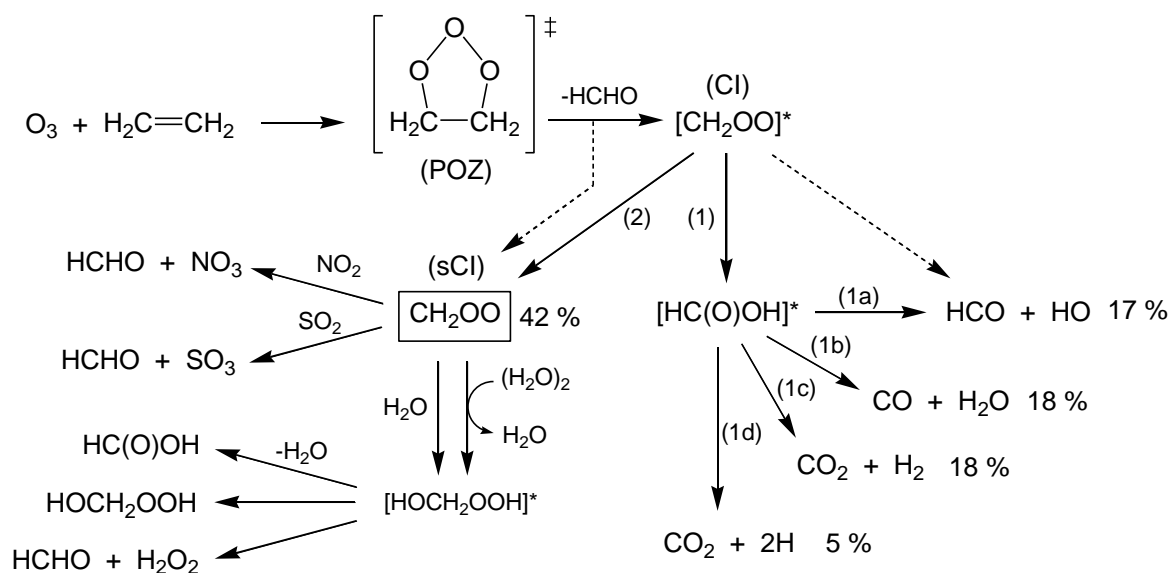

The schematic also shows some established features of the further chemistry of  $[\text{CH}_2\text{OO}]^*$ , with suggested contributions of a number of product pathways at 298 K and atmospheric pressure, based on a consensus of the literature. Direct and indirect evidence for the formation of HO radicals has been reported in numerous studies (e.g. Atkinson et al., 1992; Paulson et al., 1999; Rickard et al., 1999; Mihelcic et al., 1999; Fenske et al., 2000; Kroll et al., 2001; Alam et al., 2011), with yields in the range 12–22 % (preferred value,  $17 \pm 5$  %). HO is believed to be formed mainly via an excited dioxirane

intermediate, which isomerises to form “hot” formic acid,  $[\text{HC(O)OH}]^*$ , before fragmenting to HO and HCO (or HO, H and CO) via reaction (1a) (Kroll et al., 2002; Johnson and Marston, 2008); although a minor contribution from direct decomposition of  $[\text{CH}_2\text{OO}]^*$  (via a four-membered transition state) cannot be ruled out (Calvert et al., 2000). Formation of  $\text{HO}_2$  radicals has also been reported (Mihelcic et al., 1999; Qi et al., 2006; Wegener et al., 2007; Alam et al., 2011), with yields in the range 10–50 % (preferred value,  $\sim 27$  %). It can be formed from the reactions of  $\text{O}_2$  with H and HCO, which are produced in reactions (1a) and (1d). The associated chemistry in reactions (1a)–(1d) also produces CO and  $\text{CO}_2$ , and the relative contributions assigned to these product pathways are consistent with reported CO and  $\text{CO}_2$  yields (e.g. Su et al., 1981; Atkinson, 1990; Thomas et al., 1993; Neeb et al., 1998).

There have been numerous determinations of the yield of the stabilized Criegee intermediate,  $\text{CH}_2\text{OO}$  (sCI), mainly based on addition of scavengers ( $\text{H}_2\text{O}$ , CO, HCHO,  $\text{HCOOH}$ ,  $\text{CF}_3\text{C(O)CF}_3$  and  $\text{SO}_2$ ) to the system and quantification of the associated reaction products (Su et al., 1980; Kan et al., 1981; Hatakeyama et al., 1984; 1986; Horie and Moortgat, 1991; Neeb et al., 1996; 1998; Horie et al., 1999; Hasson et al., 2001; Alam et al., 2011; Newland et al., 2015; 2020).  $\text{CH}_2\text{OO}$  yields in the range 35–54 % have been obtained at room temperature and atmospheric pressure (preferred value,  $42 \pm 10$  %). The yield appears to display a dependence on total pressure, with a significant fraction of stabilised  $\text{CH}_2\text{OO}$  reported to be formed at low pressures (Hatakeyama et al., 1986). By extrapolation of measurements made down to 13 mbar, they found the yield to be reduced by about a factor of two at zero pressure, suggesting significant ( $\sim 20$  %) direct formation of stabilised  $\text{CH}_2\text{OO}$  (and HCHO) from the decomposition of POZ.

Based on reported kinetic data (summarised and evaluated in datasheets CGI\_1 to CGI\_12), the major fate of  $\text{CH}_2\text{OO}$  under tropospheric conditions is expected to be removal via bimolecular reactions, particularly with  $(\text{H}_2\text{O})_2$ , as illustrated in the schematic above.

## References

- Adeniji, A. A., Kerr, J. A. and Williams, M. R.: *Int. J. Chem. Kinet.*, 13, 209, 1981.
- Alam, M. S., Camredon, M., Rickard, A. R., Carr, T., Wyche, K. P., Hornsby, K. E., Monks, P. S. and Bloss, W. J.: *Phys. Chem. Chem. Phys.*, 13, 11002, 2011.
- Atkinson, R.: *Atmos. Environ.*, 24A, 1, 1990.
- Atkinson, R.: *J. Phys. Chem. Ref. Data*, 26, 215, 1997.
- Atkinson, R., Aschmann, S. M., Fitz, D. R., Winer, A. M. and Pitts Jr., J. N.: *Int. J. Chem. Kinet.*, 14, 13, 1982.
- Atkinson, R., Aschmann, S. M., Arey, J. and Shorees, B.: *J. Geophys. Res.*, 97, 6065, 1992.
- Bahta, A., Simonaitis, R. and Hecklen, J.: *Int. J. Chem. Kinet.*, 16, 1227, 1984.
- Calvert, J. G., Atkinson, R., Kerr, J. A., Madronich, S., Moortgat, G. K., Wallington, T. J. and Yarwood, G.: *The mechanisms of atmospheric oxidation of the alkenes*, Oxford University Press, Oxford. ISBN 0-19-513177-0, 2000.
- DeMore, W. B.: *Int. J. Chem. Kinet.*, 1, 209, 1969.
- Fenske, J. D., Hasson, A. S., Paulson, S. E., Kuwata, K. T., Ho, A. and Houk, K. N.: *J. Phys. Chem. A*, 104, 7821, 2000.
- Grosjean, E. and Grosjean, D.: *Environ. Sci. Technol.*, 30, 2036, 1996.
- Grosjean, E., de Andrade, J. B. and Grosjean, D.: *Environ. Sci. Technol.*, 30, 975, 1996.
- Hasson, A. S., Orzechowska, G. and Paulson, S. E.: *J. Geophys. Res.*, 106, 34131, 2001.
- Hatakeyama, S., Kobayashi, H. and Akimoto, H.: *J. Phys. Chem.*, 88, 4736, 1984.
- Hatakeyama, S., Kobayashi, H., Lin, Z.-Y., Takagi, H. and Akimoto, H.: *J. Phys. Chem.*, 90, 4131, 1986.
- Herron, J. T. and Huie, R. E.: *J. Phys. Chem.*, 78, 2085, 1974.
- Herron, J. T. and Huie, R. E.: *J. Am. Chem. Soc.*, 99, 5430, 1977.
- Horie, O. and Moortgat, G. K.: *Atmos. Environ.*, 25A, 1881, 1991.

Horie, O., Schafer, C. and Moortgat, G. K.: *Int. J. Chem. Kinet.*, 31, 261, 1999.

Japar, S. M., Wu, C. H. and Niki, H.: *J. Phys. Chem.*, 78, 2318, 1974.

Japar, S. M., Wu, C. H. and Niki, H.: *J. Phys. Chem.*, 80, 2057, 1976.

Johnson, D. and Marston, G.: *Chem. Soc. Rev.*, 37, 699, 2008.

Kan, C. S., Su, F., Calvert, J. G. and Shaw, J. H.: *J. Phys. Chem.*, 85, 2359, 1981.

Kroll, J. H., Sahay, S. R., Anderson, J. G., Demerjian, K. L. and Donahue, N. M.: *J. Phys. Chem. A*, 105, 4446, 2001.

Kroll, J. H., Donahue, N. M., Cee, V. J., Demerjian, K. L. and Anderson, J. G.: *J. Am. Chem. Soc.*, 124, 8518, 2002.

Mihelcic, D., Heitlinger, M., Kley, D., Musgen P. and Volz-Thomas, A.: *Chem. Phys. Lett.*, 301, 559, 1999.

Neeb, P., Horie, O. and Moortgat, G. K.: *Int. J. Chem. Kinet.*, 28, 721, 1996.

Neeb, P., Horie, O. and Moortgat, G. K.: *J. Phys. Chem. A*, 102, 6778, 1998.

Newland, M. J., Rickard, A. R., Alam, M. S., Vereecken, L., Muñoz, A., Ródenas, M. and Bloss, W. J.: *Phys. Chem. Chem. Phys.*, 17, 4076-4088, 2015.

Newland, M. J., Nelson, B. S., Muñoz, A., Ródenas, M., Vera, T., Tárrega, J., and Rickard, A. R.: *Phys. Chem. Chem. Phys.*, 22, 13698, 2020.

Niki, H., Maker, P. D., Savage, C. M. and Breitenbach, L. P.: *J. Phys. Chem.*, 85, 1024, 1981.

Paulson, S. E., Fenske, J. D., Sen, A. D. and Callahan, T. W.: *J. Phys. Chem. A*, 103, 2050, 1999.

Qi, B., Sato, K., Imamura, T., Takami, A., Hatakeyama, S. and Ma, Y.: *Chem. Phys. Lett.*, 427, 461, 2006.

Rickard, A. R., Johnson, D., McGill, C. D. and Marston, G.: *J. Phys. Chem. A*, 103, 7656, 1999.

Søndergaard, R., Nielsen, O. J., Hurley, M. D., Wallington, T. J. and Singh, R.: *Chem. Phys. Lett.*, 443, 199, 2007.

Stedman, D. H., Wu, C. H. and Niki, H.: *J. Phys. Chem.*, 77, 2511, 1973.

Su, F., Calvert, J. G. and Shaw, J. H.: *J. Phys. Chem.*, 84, 239, 1980.

Thomas, W., Zabel, F., Becker, K. H. and Fink, E. H.: *Proceedings of the 1st European Symposium on Physico-Chemical Behaviour of Atmospheric Pollutants*, Varese, Italy, 207, 1993.

Toby, F. S., Toby, S. and O'Neal, H. E.: *Int. J. Chem. Kinet.*, 8, 25, 1976.

Treacy, J., El Hag, M., O'Farrell, D. and Sidebottom, H.: *Ber. Bunsenges. Phys. Chem.*, 96, 422, 1992.

Wang, H. T., Zhang, Y. J. and Mu, Y. J.: *J. Environ. Sci. Chi.*, 19, 641, 2007.

Wegener, R., Brauers, T., Koppmann, R., Bares, S. R., Rohrer, F., Tillmann, R., Wahner, A., Hansel, A. and Wisthaler, A.: *J. Geophys. Res. Atmos.*, 112, 2007, doi: 10.1029/2006JD007531.

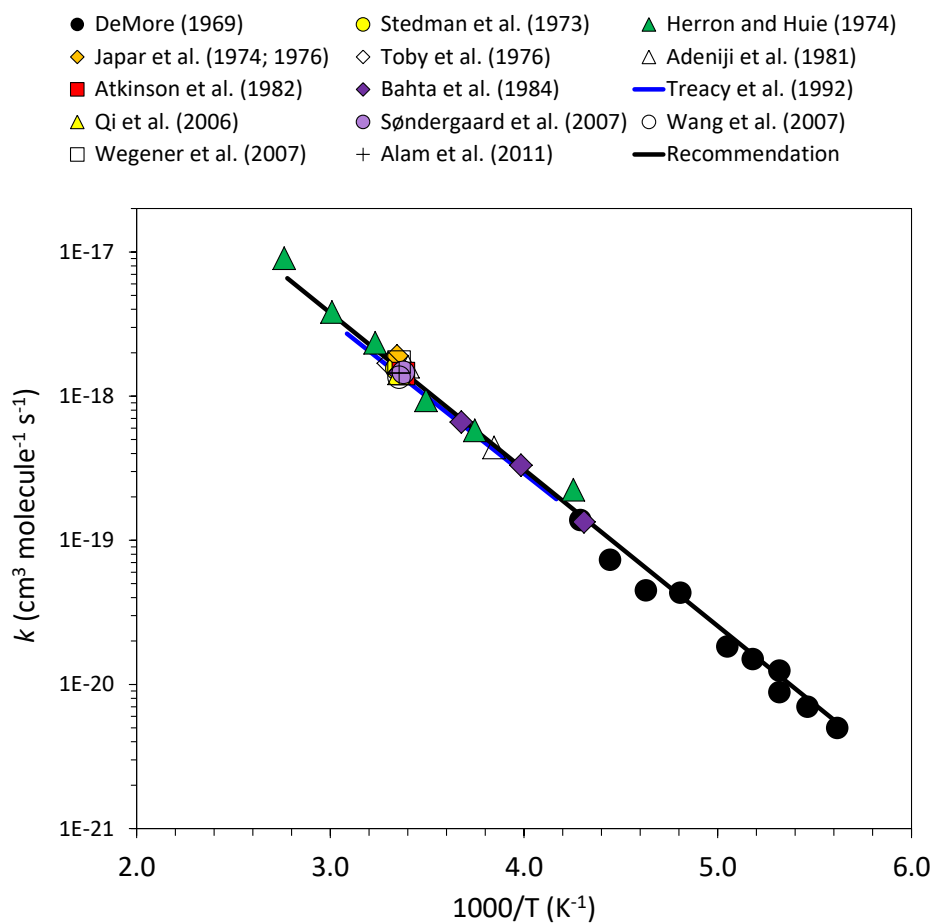

**Ox\_VOC6: propene**

Last evaluated: August 2020; Last change in preferred values: July 2018

**O<sub>3</sub> + C<sub>3</sub>H<sub>6</sub> → products****Rate coefficient data**

| $k/\text{cm}^3 \text{ molecule}^{-1} \text{ s}^{-1}$ | Temp./K | Reference                | Technique/ Comments |
|------------------------------------------------------|---------|--------------------------|---------------------|
| <i>Absolute Rate Coefficients</i>                    |         |                          |                     |
| $1.26 \times 10^{-17}$                               | 295     | Cox and Penkett, 1972    | S-CL/GC-FID (a)     |
| $(1.25 \pm 0.10) \times 10^{-17}$                    | 299     | Stedman et al., 1973     | S-CL/GC-FID (a)     |
| $6.14 \times 10^{-15} \exp[-(1897 \pm 109)/T]$       | 235-362 | Herron and Huie, 1974    | MS/MS (a),(b)       |
| $1.06 \times 10^{-17}$                               | 298*    |                          |                     |
| $(1.3 \pm 0.1) \times 10^{-17}$                      | 299     | Japar et al., 1974, 1976 | S-CL/GC-FID (a)     |
| $5.1 \times 10^{-18}$                                | 260     | Adeniji et al., 1981     | S-CL/GC-FID (a)     |
| $1.26 \times 10^{-17}$                               | 294     |                          |                     |
| $(1.04 \pm 0.14) \times 10^{-17}$                    | 296     | Atkinson et al., 1982    | S-CL/GC-FID (a)     |
| $4.9 \times 10^{-15} \exp[-(1858 \pm 70)/T]$         | 240-324 | Treacy et al., 1992      | S-CL (a)            |
| $(9.4 \pm 0.4) \times 10^{-18}$                      | 298     |                          |                     |
| $1.15 \times 10^{-17}$                               | 296 ± 2 | Neeb and Moortgat, 1999  | S-FTIR (c)          |
| $5.8 \times 10^{-15} \exp[-(1907 \pm 53)/T]$         | 282-314 | Jia et al., 2006         | S-UVA/GC-FID (a)    |
| $1.01 \times 10^{-17}$                               | 300     |                          |                     |
| $(1.06 \pm 0.12) \times 10^{-17}$                    | 298     | Wegener et al., 2007     | S-UVA/GC-FID (d)    |

**Comments**

- (a)  $k$  determined from the observed first-order rate of ozone decay (measured by the first technique shown) in the presence of known excess concentrations of propene (measured either by the second technique shown, or with the initial concentration determined by quantified dilution of the pure gas).
- (b) Due to a typographical error, the lowest temperature studied was 235.0 K and not 250.0 K as stated in Table 2 of Herron and Huie (1974).
- (c)  $k$  determined from the observed first-order rate of propene decay in the presence of known excess concentrations of ozone, with both reagents measured by FTIR. Cyclohexane added to scavenge HO radicals.
- (d) Experiments carried out with comparable concentrations of each reagent, in the presence of excess CO as an HO radical scavenger. The system was simulated using an explicit chemical mechanism, with  $k$  optimized to recreate the observed decays in the concentrations of ozone (measured by the first technique shown) and propene (measured by the second technique shown).



## Preferred Values

| Parameter                                              | Value                                | T/K     |
|--------------------------------------------------------|--------------------------------------|---------|
| $k / \text{cm}^3 \text{ molecule}^{-1} \text{ s}^{-1}$ | $1.05 \times 10^{-17}$               | 298     |
| $k / \text{cm}^3 \text{ molecule}^{-1} \text{ s}^{-1}$ | $5.77 \times 10^{-15} \exp(-1880/T)$ | 230-370 |
| <i>Reliability</i>                                     |                                      |         |
| $\Delta \log k$                                        | $\pm 0.15$                           | 298     |
| $\Delta E/R$                                           | $\pm 100$                            | 230-370 |

### Comments on Preferred Values

The absolute kinetics determinations are in generally good agreement, with consistent values of the temperature coefficient ( $E/R$ ) reported in a number of studies. The preferred value of  $E/R$  is a rounded average of those reported by Herron and Huie (1974) and Treacy et al. (1992), which is also consistent with those reported by Adeniji et al. (1981) and Jia et al. (2006) over narrow temperature ranges. The preferred value of  $k$  at 298 K is an average of the room temperature determinations reported by Herron and Huie (1974), Atkinson et al. (1982), Treacy et al. (1992), Neeb and Moortgat (1999), Jia et al. (2006) and Wegener et al. (2007), corrected to 298 K, where necessary, using the preferred value of  $E/R$ . The other tabulated determinations are consistent with this recommendation, being about 20-30 % higher than the preferred value.

It is well established that the reaction proceeds by initial addition of  $\text{O}_3$  to form an energy-rich “primary ozonide (POZ)” which rapidly decomposes to form two sets of “primary” carbonyl product plus (excited) Criegee intermediate, as shown in the schematic below. Reported primary yields of acetaldehyde ( $\text{CH}_3\text{CHO}$ ) and formaldehyde ( $\text{HCHO}$ ) suggest important contributions from both decomposition channels, (a) and (b), with  $k_b/(k_a+k_b)$  lying in the range 0.60-0.65 (Horie and Moortgat 1991; Grosjean et al., 1996; Tuazon et al., 1997; Rickard et al., 1999; Newland et al., 2020), consistent with the values given in the schematic.

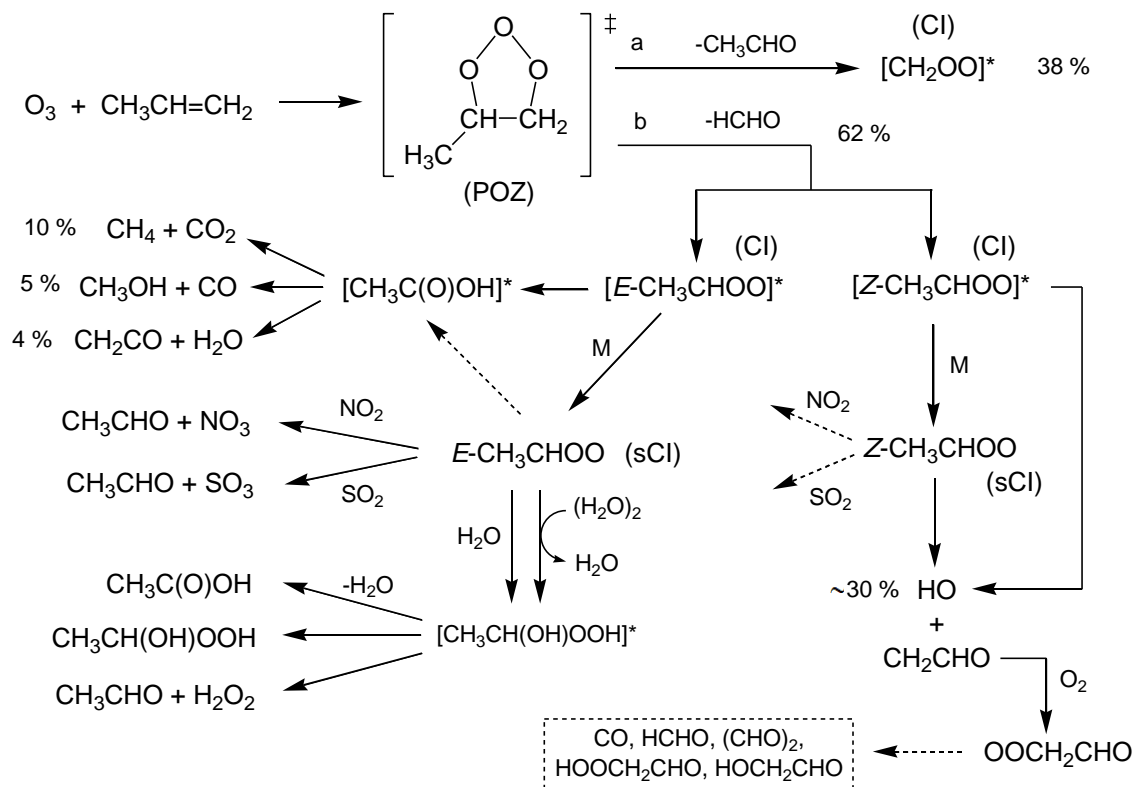

The further chemistry of  $[\text{CH}_2\text{OO}]^*$ , formed from channel (a), is expected to follow the pathways described in the data sheet for the  $\text{O}_3 + \text{C}_2\text{H}_4$  reaction (Ox\_VOC5), although their relative importance is not necessarily the same. Channel (b) forms either  $[E\text{-CH}_3\text{CHOO}]^*$  or  $[Z\text{-CH}_3\text{CHOO}]^*$ , in conjunction with HCHO. The schematic above shows some established features of the further chemistry of these excited Criegee intermediates, with suggested contributions of a number of product pathways at 298 K and atmospheric pressure, based on a consensus of the literature. They may either decompose via a number of possible pathways, or be collisionally deactivated to form the corresponding stabilized Criegee intermediates (sCI), i.e.  $E\text{-CH}_3\text{CHOO}$  and  $Z\text{-CH}_3\text{CHOO}$  (Fenske et al., 2000a).

Direct and indirect evidence for the formation of HO radicals has been reported in numerous studies (e.g. Atkinson and Aschmann, 1993; Neeb and Moortgat, 1999; Paulson et al., 1999; Rickard et al., 1999; Aschmann et al., 2003; Wegener et al., 2007; Qi et al., 2009; Alam et al., 2013), with yields in the range 30–40 % (preferred value,  $36 \pm 4$  %). HO is expected to be formed mainly from either  $[Z\text{-CH}_3\text{CHOO}]^*$  or  $Z\text{-CH}_3\text{CHOO}$ , by an accepted decomposition mechanism involving abstraction of a  $\beta$ -hydrogen via a vinyl hydroperoxide intermediate (Fenske et al., 2000b; Kroll et al., 2001), also forming the vinoxy radical ( $\text{CH}_2\text{CHO}$ ) as a co-product. A minor contribution to HO formation may also result from decomposition of  $[\text{CH}_2\text{OO}]^*$ . Assuming that the relative importance of the reaction pathways for  $[\text{CH}_2\text{OO}]^*$  formed from propene are similar to those for  $[\text{CH}_2\text{OO}]^*$  formed from ethene, this contribution is estimated to be about 6 %, suggesting that decomposition of  $[Z\text{-CH}_3\text{CHOO}]^*$  and  $Z\text{-CH}_3\text{CHOO}$  contributes about 30 %. The vinoxy radical ( $\text{CH}_2\text{CHO}$ ) reacts with  $\text{O}_2$  under atmospheric conditions. At 1 bar, this is expected to form a stabilized peroxy radical, which can undergo conventional bimolecular reactions (e.g. with NO,  $\text{HO}_2$  and other peroxy radicals) to form a number of products as shown, including secondary HCHO and glyoxal,  $(\text{CHO})_2$ , which has been reported to be formed with a yield of about 3 % (Tuazon et al., 1997). At pressures below about 270 mbar, the (chemically-activated) peroxy radical adduct has also been reported to decompose (e.g. to form  $\text{HO} + \text{HCHO} + \text{CO}$ ), thereby providing a small secondary source of HO radicals (Oguchi et al., 2004).

Evidence for the decomposition pathways for  $[E\text{-CH}_3\text{CHOO}]^*$  shown in the schematic (proceeding via formation of “hot” acetic acid,  $[\text{CH}_3\text{C}(\text{O})\text{OH}]^*$ ) has been reported by Tuazon et al. (1997), with the suggested contributions based on the yields of methane ( $\text{CH}_4$ ), methanol ( $\text{CH}_3\text{OH}$ ) and ketene ( $\text{CH}_2\text{CO}$ ) reported in that study.

The total yield of stabilized Criegee intermediates (sCI) in the system ( $\text{CH}_2\text{OO} + E\text{-CH}_3\text{CHOO} + Z\text{-CH}_3\text{CHOO}$ ) at atmospheric pressure has been determined by scavenging with added  $\text{SO}_2$  and quantifying the associated products,  $\text{H}_2\text{SO}_4$  (Hatekayama et al., 1984) or HCHO and  $\text{CH}_3\text{CHO}$  (Newland et al., 2020). The recommended total yield, based on these studies, is  $30 \pm 10$  %. Newland et al. (2020) report that  $\text{CH}_2\text{OO}$  makes a major contribution, accounting for about two-thirds of the total.

Based on reported kinetic data (summarised and evaluated in datasheets CGI\_15 to CGI\_17), the major fate of  $E\text{-CH}_3\text{CHOO}$  under tropospheric conditions is expected to be removal via bimolecular reactions, in particular with  $\text{H}_2\text{O}$  and  $(\text{H}_2\text{O})_2$ , as illustrated in the schematic above. The major fate of  $Z\text{-CH}_3\text{CHOO}$  is expected to be thermal decomposition, as described above.

## References

- Adeniji, A. A., Kerr, J. A. and Williams, M. R.: Int. J. Chem. Kinet., 13, 209, 1981.  
 Alam, M. S., Rickard, A. R., Camredon, M., Wyche, K. P., Carr, T., Hornsby, K. E., Monks, P. S. and Bloss, W. J.: J. Phys. Chem., 117, 12468, 2013.  
 Aschmann, S. M., Tuazon, E. C., Arey, J. and Atkinson, R.: J. Phys. Chem. A, 107, 2247, 2003.  
 Atkinson, R. and Aschmann, S. M.: Environ. Sci. Technol., 27, 1357, 1993.  
 Atkinson, R., Aschmann, S. M., Fitz, D. R., Winer, A. M. and Pitts Jr., J. N.: Int. J. Chem. Kinet., 14, 13, 1982.  
 Cox, R. A. and Penkett, S. A.: J. Chem. Soc., Faraday Trans. 1, 68, 1735, 1972.  
 Fenske, J. D., Hasson, A. S., Ho, A. W. and Paulson, S. E.: J. Phys. Chem. A, 104, 9921, 2000a.

Fenske, J. D., Hasson, A. S., Paulson, S. E., Kuwata, K. T., Ho, A. and Houk, K. N.: J. Phys. Chem. A, 104, 7821, 2000b.

Grosjean, E., de Andrade, J. B. and Grosjean, D.: Environ. Sci. Technol., 30, 975, 1996.

Hatakeyama, S., Kobayashi, H. and Akimoto, H.: J. Phys. Chem., 88, 4736, 1984.

Herron, J. T. and Huie, R. E.: J. Phys. Chem., 78, 2085, 1974.

Horie, O. and Moortgat, G. K.: Atmos. Environ., 25A, 1881, 1991.

Japar, S. M., Wu, C. H. and Niki, H.: J. Phys. Chem., 78, 2318, 1974.

Japar, S. M., Wu, C. H. and Niki, H.: J. Phys. Chem., 80, 2057, 1976.

Jia, L., Xu, L., Ge, M., Du, L., Wang, G. and Zhuang, G.: Acta Phys. -Chim. Sin., 22(10), 1260, 2006.

Kroll, J. H., Sahay, S. R., Anderson, J. G., Demerjian, K. L. and Donahue, N. M.: J. Phys. Chem. A, 105, 4446, 2001.

Neeb, P. and Moortgat, G. K.: J. Phys. Chem. A, 103, 9003, 1999.

Newland, M. J., Nelson, B. S., Muñoz, A., Ródenas, M., Vera, T., Tárrega, J., and Rickard, A. R.: Phys. Chem. Chem. Phys., 22, 13698, 2020.

Oguchi, T, Sato, Y., Matsui, H., 18th Symposium on Gas Kinetics, Bristol, UK, 2004. Poster B13.

Paulson, S. E., Fenske, J. D., Sen, A. D. and Callahan, T. W.: J. Phys. Chem. A, 103, 2050, 1999.

Qi, B., Yang, B., Wang, Z. Q., Yang, H. Y. and Liu, L.: Sci. China, Ser. B: Chem., 52, 356, 2009.

Rickard, A. R., Johnson, D., McGill, C. D. and Marston, G.: J. Phys. Chem. A, 103, 7656, 1999.

Stedman, D. H., Wu, C. H. and Niki, H.: J. Phys. Chem., 77, 2511, 1973.

Treacy, J., El Hag, M., O'Farrell, D. and Sidebottom, H.: Ber. Bunsenges. Phys. Chem., 96, 422, 1992.

Tuazon, E. C., Aschmann, S. M., Arey, J. and Atkinson, R.: Environ. Sci. Technol., 31, 3004, 1997.

Wegener, R., Brauers, T., Koppmann, R., Bares, S. R., Rohrer, F., Tillmann, R., Wahner, A., Hansel, A. and Wisthaler, A.: J. Geophys. Res. Atmos., 112, 2007, doi: 10.1029/2006JD007531.

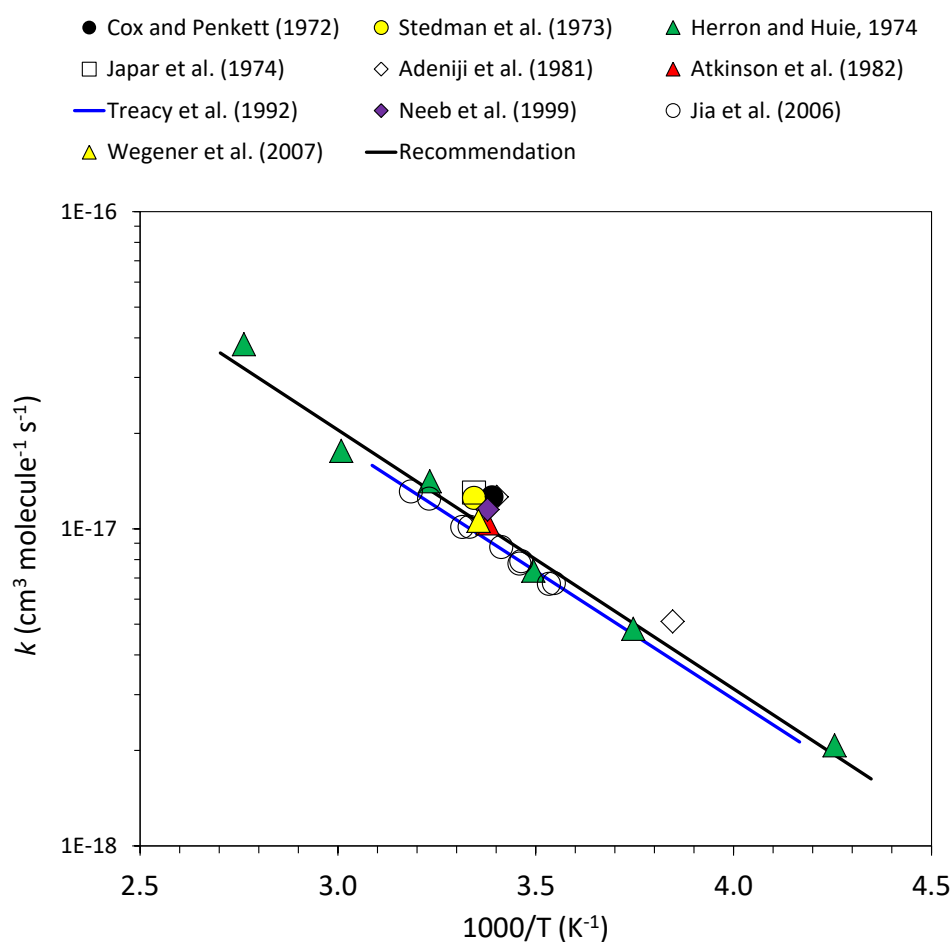

**Ox\_VOC16: but-1-ene**

Last evaluated: July 2018; Last change in preferred values: July 2018

**O<sub>3</sub> + but-1-ene → products****Rate coefficient data**

| $k/\text{cm}^3 \text{ molecule}^{-1} \text{ s}^{-1}$ | Temp./K     | Reference                 | Technique/<br>Comments |
|------------------------------------------------------|-------------|---------------------------|------------------------|
| <i>Absolute Rate Coefficients</i>                    |             |                           |                        |
| $(1.23 \pm 0.04) \times 10^{-17}$                    | $299 \pm 2$ | Japar et al., 1974        | S-CL/GC-FID (a)        |
| $2.93 \times 10^{-15} \exp[-(1686 \pm 20)/T]$        | 225-363     | Huie and Herron, 1975     | MS/MS (a)              |
| $1.03 \times 10^{-17}$                               | 298*        |                           |                        |
| $5.3 \times 10^{-18}$                                | $260 \pm 2$ | Adeniji et al., 1981      | S-CL/GC-FID (a)        |
| $1.24 \times 10^{-17}$                               | $294 \pm 2$ |                           |                        |
| $3.7 \times 10^{-15} \exp[-(1801 \pm 155)/T]$        | 240-324     | Treacy et al., 1992       | S-CL (a)               |
| $(8.8 \pm 0.6) \times 10^{-18}$                      | 298         |                           |                        |
| $(9.64 \pm 0.87) \times 10^{-18}$                    | 298         | Wegener et al., 2007      | S-UVA/GC-FID (b)       |
| $3.5 \times 10^{-15} \exp[-(1756 \pm 84)/T]$         | 294.9-350.2 | Shi et al., 2011          | S-UVA (a)              |
| $9.66 \times 10^{-18}$                               | 298*        |                           |                        |
| <i>Relative Rate Coefficients</i>                    |             |                           |                        |
| $(9.85 \pm 0.03) \times 10^{-18}$                    | $296 \pm 2$ | Greene and Atkinson, 1992 | RR/GC-FID (c)          |
| $4.0 \times 10^{-15} \exp[-(1754 \pm 46)/T]$         | 278-353     | Avzianova and Ariya, 2002 | RR/GC-FID (d)          |
| $(1.14 \pm 0.09) \times 10^{-17}$                    | 298         |                           |                        |

**Comments**

- (a)  $k$  determined from the observed first-order rate of ozone decay (measured by the first technique shown) in the presence of known excess concentrations of but-1-ene (measured either by the second technique shown, or with the initial concentration determined by quantified dilution of the pure gas).
- (b) Experiments carried out with comparable concentrations of each reagent, in the presence of excess CO as an HO radical scavenger. The system was simulated using an explicit chemical mechanism, with  $k$  optimized to recreate the observed decays in the concentrations of ozone (measured by the first technique shown) and but-1-ene (measured by the second technique shown).
- (c) Relative rate study, with *n*-octane present to scavenge HO radicals. The concentrations of but-1-ene and propene (the reference compound) were measured by GC. The measured value of  $k(\text{O}_3 + \text{but-1-ene})/k(\text{O}_3 + \text{propene}) = 0.975 \pm 0.030$  is placed on an absolute basis using  $k(\text{O}_3 + \text{propene}) = 1.01 \times 10^{-17} \text{ cm}^3 \text{ molecule}^{-1} \text{ s}^{-1}$  at 296 K (IUPAC, current recommendation).
- (d) Relative rate study, with 1,3,5-trimethylbenzene present to scavenge HO radicals. The concentrations of but-1-ene and propene (the reference compound) were measured by GC. The measured rate coefficient ratios were not tabulated. The expression  $k(\text{O}_3 + \text{but-1-ene})/k(\text{O}_3 + \text{propene}) = 0.694 \exp[(126 \pm 46)/T]$ , derived from the data, is placed on an absolute basis using  $k(\text{O}_3 + \text{propene}) = 5.77 \times 10^{-15} \exp(-1880/T) \text{ cm}^3 \text{ molecule}^{-1} \text{ s}^{-1}$  (IUPAC, current recommendation).

### Preferred Values

| Parameter                                              | Value                                | T/K     |
|--------------------------------------------------------|--------------------------------------|---------|
| $k / \text{cm}^3 \text{ molecule}^{-1} \text{ s}^{-1}$ | $1.0 \times 10^{-17}$                | 298     |
| $k / \text{cm}^3 \text{ molecule}^{-1} \text{ s}^{-1}$ | $3.55 \times 10^{-15} \exp(-1750/T)$ | 220-370 |
| <i>Reliability</i>                                     |                                      |         |
| $\Delta \log k$                                        | $\pm 0.08$                           | 298     |
| $\Delta E/R$                                           | $\pm 200$                            | 220-370 |

#### Comments on Preferred Values

The kinetics determinations are in generally good agreement, with consistent values of the temperature coefficient ( $E/R$ ) reported in a number of studies. The preferred value of  $E/R$  is the average of those reported by Huie and Herron (1975), Treacy et al. (1992), Avzianova and Ariya (2002) and Shi et al. (2011), which is also consistent with the relative values reported at 260 K and 294 K by Adeniji et al. (1981). The preferred value of  $k$  at 298 K is an average of the room temperature determinations reported by Huie and Herron (1975), Treacy et al. (1992), Greene and Atkinson (1992), Avzianova and Ariya (2002), Wegener et al. (2007) and Shi et al. (2011), corrected to 298 K, where necessary, using the preferred value of  $E/R$ . The other tabulated determinations are consistent with this recommendation, being about 20-30 % higher than the preferred value.

It is well established that the reaction proceeds by initial addition of  $\text{O}_3$  to form an energy-rich “primary ozonide” which rapidly decomposes to form two sets of primary carbonyl product plus (excited) Criegee intermediate, as shown in the schematic below. Reported primary yields of propanal ( $\text{C}_2\text{H}_5\text{CHO}$ ) and formaldehyde ( $\text{HCHO}$ ) suggest important contributions from both decomposition channels, (a) and (b), with  $k_b/(k_a+k_b) \approx 0.65$  (Grosjean et al., 1996; Paulson et al., 1999; Hasson et al., 2001).

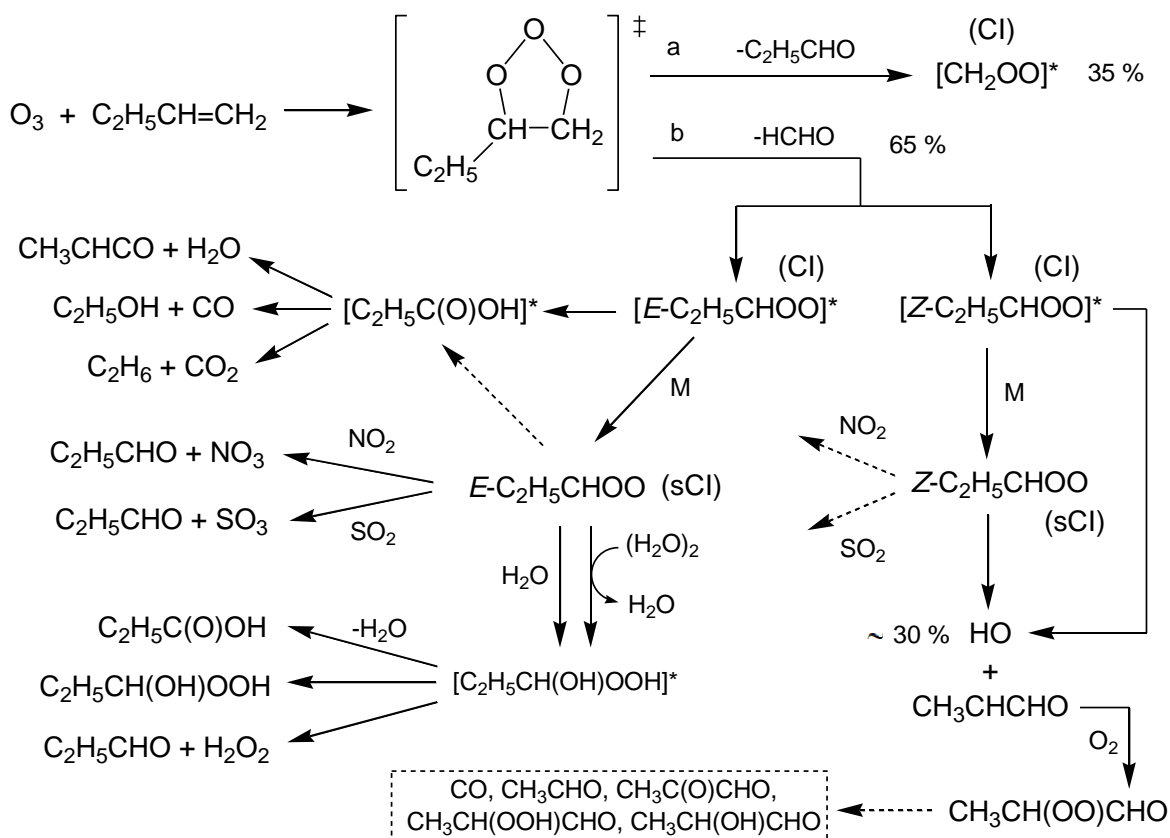

The further chemistry of  $[\text{CH}_2\text{OO}]^*$  is expected to follow the pathways described in the data sheet for the  $\text{O}_3 + \text{C}_2\text{H}_4$  reaction (Ox\_VOC5), although their relative importance is not necessarily the same. Channel (b) forms either  $[\text{E-C}_2\text{H}_5\text{CHOO}]^*$  or  $[\text{Z-C}_2\text{H}_5\text{CHOO}]^*$ , in conjunction with  $\text{HCHO}$ . The schematic above shows some probable features of the further chemistry of these excited Criegee intermediates, based partly by analogy with *E*- and *Z*- $[\text{CH}_3\text{CHOO}]^*$  conformers formed in the  $\text{O}_3 + \text{C}_3\text{H}_6$  system (Ox\_VOC6). Where shown, product yields are appropriate to 298 K and atmospheric pressure.  $[\text{E-C}_2\text{H}_5\text{CHOO}]^*$  and  $[\text{Z-C}_2\text{H}_5\text{CHOO}]^*$  may either decompose via a number of possible pathways, or be collisionally deactivated to form the corresponding stabilized Criegee intermediates (sCI), i.e. *E*- $\text{C}_2\text{H}_5\text{CHOO}$  and *Z*- $\text{C}_2\text{H}_5\text{CHOO}$  (Fenske et al., 2000a).

Direct and indirect evidence for the formation of HO radicals has been reported in several studies (e.g. Atkinson and Aschmann, 1993; Paulson et al., 1999; Fenske et al., 2000b; Wegener et al., 2007; Alam et al., 2013), with yields in the range 26–56 % (preferred value,  $38 \pm 18$  %). HO is expected to be formed mainly from either  $[\text{Z-C}_2\text{H}_5\text{CHOO}]^*$  or *Z*- $\text{C}_2\text{H}_5\text{CHOO}$ , by an accepted decomposition mechanism involving abstraction of a  $\beta$ -hydrogen via a vinyl hydroperoxide intermediate (Fenske et al., 2000b; Kroll et al., 2001), also forming the 2-methylvinoxy radical ( $\text{CH}_3\text{CHCHO}$ ) as a co-product. A minor contribution to HO formation may also result from decomposition of  $[\text{CH}_2\text{OO}]^*$ . Assuming that the relative importance of the reaction pathways for  $[\text{CH}_2\text{OO}]^*$  formed from but-1-ene are similar to those for  $[\text{CH}_2\text{OO}]^*$  formed from ethene, this contribution is estimated to be about 6 %, suggesting that decomposition of  $[\text{Z-C}_2\text{H}_5\text{CHOO}]^*$  and *Z*- $\text{C}_2\text{H}_5\text{CHOO}$  contributes about 30 %. The 2-methylvinoxy radical ( $\text{CH}_3\text{CHCHO}$ ) reacts with  $\text{O}_2$  under atmospheric conditions (Oguchi et al., 2001). At 1 bar, this is expected to form a stabilized peroxy radical, which can undergo conventional bimolecular reactions (e.g. with NO,  $\text{HO}_2$  and other peroxy radicals) to form a number of products as shown. No direct evidence has been reported for the other decomposition pathways shown for  $[\text{E-C}_2\text{H}_5\text{CHOO}]^*$  (proceeding via formation of “hot” propanoic acid,  $[\text{CH}_3\text{C}(\text{O})\text{OH}]^*$ ), but they are inferred from the corresponding products reported for the reaction of ozone with propene (see datasheet Ox\_VOC6).

The total yield of stabilized Criegee intermediates (sCI) in the system ( $\text{CH}_2\text{OO} + \text{E-C}_2\text{H}_5\text{CHOO} + \text{Z-C}_2\text{H}_5\text{CHOO}$ ) has been reported to be 27 % by Hasson et al. (2001), based on scavenging with added  $\text{H}_2\text{O}$  and quantification of the yields of associated products ( $\text{HOCH}_2\text{OOH}$ ,  $\text{C}_2\text{H}_5\text{CHO}$  and  $\text{H}_2\text{O}_2$ ). Assuming that the relative importance of the reaction pathways for  $[\text{CH}_2\text{OO}]^*$  formed from but-1-ene are similar to those for  $[\text{CH}_2\text{OO}]^*$  formed from ethene,  $\text{CH}_2\text{OO}$  makes a significant estimated contribution ( $\sim 15$  %) to the total sCI yield.

The major fate of *E*- $\text{CH}_3\text{CHOO}$  under tropospheric conditions is expected to be removal via bimolecular reactions, particularly with  $\text{H}_2\text{O}$  and  $(\text{H}_2\text{O})_2$ , as illustrated in the schematic above. The major fate of *Z*- $\text{C}_2\text{H}_5\text{CHOO}$  is expected to be thermal decomposition, as described above.

## References

- Adeniji, S. A., Kerr, J. A. and Williams, M. R.: Int. J. Chem. Kinet., 13, 209, 1981.  
 Alam, M. S., Rickard, A. R., Camredon, M., Wyche, K. P., Carr, T., Hornsby, K. E., Monks, P. S. and Bloss, W. J.: J. Phys. Chem., 117, 12468, 2013.  
 Atkinson, R. and Aschmann, S. M.: Environ. Sci. Technol., 27, 1357, 1993.  
 Avzianova, E. V. and Ariya, P. A.: Int. J. Chem. Kinet., 34, 678, 2002.  
 Fenske, J. D., Hasson, A. S., Ho, A. W. and Paulson, S. E.: J. Phys. Chem. A, 104, 9921, 2000a.  
 Fenske, J. D., Hasson, A. S., Paulson, S. E., Kuwata, K. T., Ho, A. and Houk, K. N.: J. Phys. Chem. A, 104, 7821, 2000b.  
 Greene, C. R. and Atkinson, R.: Int. J. Chem. Kinet., 24, 803, 1992.  
 Grosjean, E., de Andrade, J. B. and Grosjean, D.: Environ. Sci. Technol., 30, 975, 1996.  
 Hasson, A. A., Ho, A. W., Kuwata, K. T. and Paulson, S. E.: J. Geophys. Res., 106, 34143, 2001.  
 Huie, R. E. and Herron, J. T.: Int. J. Chem. Kinet., Symp. 1, 165, 1975.  
 Japar, S. M., Wu, C. H. and Niki, H.: J. Phys. Chem., 78, 2318, 1974.

Kroll, J. H., Sahay, S. R., Anderson, J. G., Demerjian, K. L. and Donahue, N. M.: J. Phys. Chem. A, 105, 4446, 2001.

Oguchi, T., Miyoshi, A., Koshi, M., Matsui, H. and Washida, N.: J. Phys. Chem. A, 105, 378, 2001.

Paulson, S. E., Chung, M. Y., Hasson, A. S.: J. Phys. Chem. A, 103, 8125, 1999.

Shi, Y.Z., Xu, Y.F. and Jia, L.: Int. J. Chem. Kinet., 43, 238, 2011.

Treacy, J., El Haag, M., O'Farrell, D. and Sidebottom, H.: Ber. Bunsenges. Phys. Chem., 96, 422, 1992.

Wegener, R., Brauers, T., Koppmann, R., Bares, S. R., Rohrer, F., Tillmann, R., Wahner, A., Hansel, A. and Wisthaler, A.: J. Geophys. Res. Atmos., 112, 2007, doi: 10.1029/2006JD007531.

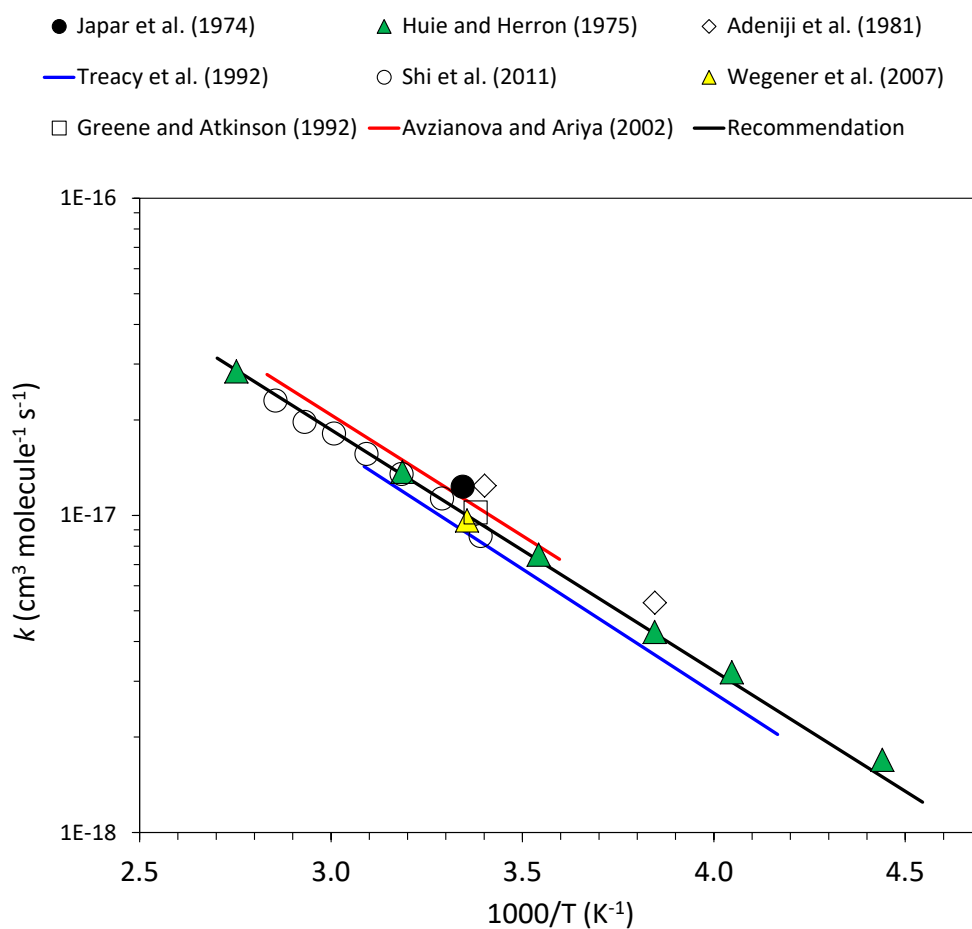

**Ox\_VOC17: *cis*-but-2-ene**

Last evaluated: July 2018; Last change in preferred values: July 2018

**O<sub>3</sub> + *cis*-but-2-ene → products****Rate coefficient data**

| <i>k</i> /cm <sup>3</sup> molecule <sup>-1</sup> s <sup>-1</sup> | Temp./K | Reference                 | Technique/Comments |
|------------------------------------------------------------------|---------|---------------------------|--------------------|
| <i>Absolute Rate Coefficients</i>                                |         |                           |                    |
| $1.41 \times 10^{-16}$                                           | 296     | Cox and Penkett, 1972     | S-CL/GC-FID (a)    |
| $(1.05 \pm 0.32) \times 10^{-16}$                                | 298     | Finlayson et al., 1974    | S-UVA/GC-FID (a)   |
| $(1.61 \pm 0.07) \times 10^{-16}$                                | 299 ± 2 | Japar et al., 1974        | S-CL/GC-FID (a)    |
| $3.11 \times 10^{-15} \exp[-(956 \pm 54)/T]$                     | 225-364 | Huie and Herron, 1975     | MS/MS (a)          |
| $1.26 \times 10^{-16}$                                           | 298*    |                           |                    |
| $(1.38 \pm 0.16) \times 10^{-16}$                                | 297 ± 1 | Atkinson et al., 1983     | S-CL/GC-FID (a)    |
| $3.4 \times 10^{-15} \exp[-(979 \pm 22)/T]$                      | 240-324 | Treacy et al., 1992       | S-CL (a)           |
| $(1.23 \pm 0.18) \times 10^{-16}$                                | 298     |                           |                    |
| $(1.29 \pm 0.11) \times 10^{-16}$                                | 298     | Wegener et al., 2007      | S-UVA/GC-FID (b)   |
| <i>Relative Rate Coefficients</i>                                |         |                           |                    |
| $(1.29 \pm 0.08) \times 10^{-16}$                                | 296 ± 2 | Greene and Atkinson, 1992 | RR/GC-FID (c)      |

**Comments**

- (a) *k* determined from the observed first-order rate of ozone decay (measured by the first technique shown) in the presence of known excess concentrations of *cis*-but-2-ene (measured either by the second technique shown, or with the initial concentration determined by quantified dilution of the pure gas).
- (b) Experiments carried out with comparable concentrations of each reagent, in the presence of excess CO as an HO radical scavenger. The system was simulated using an explicit chemical mechanism, with *k* optimized to recreate the observed decays in the concentrations of ozone (measured by the first technique shown) and *cis*-but-2-ene (measured by the second technique shown).
- (c) Relative rate study, with *n*-octane present to scavenge HO radicals. The concentrations of *cis*-but-2-ene and propene (the reference compound) were measured by GC. The measured value of  $k(\text{O}_3 + \text{cis-but-2-ene})/k(\text{O}_3 + \text{propene}) = 12.8 \pm 0.8$  is placed on an absolute basis using  $k(\text{O}_3 + \text{propene}) = 1.01 \times 10^{-17} \text{ cm}^3 \text{ molecule}^{-1} \text{ s}^{-1}$  at 296 K (IUPAC, current recommendation).

**Preferred Values**

| Parameter                                                        | Value                               | T/K     |
|------------------------------------------------------------------|-------------------------------------|---------|
| <i>k</i> /cm <sup>3</sup> molecule <sup>-1</sup> s <sup>-1</sup> | $1.3 \times 10^{-16}$               | 298     |
| <i>k</i> /cm <sup>3</sup> molecule <sup>-1</sup> s <sup>-1</sup> | $3.37 \times 10^{-15} \exp(-970/T)$ | 220-370 |
| <i>Reliability</i>                                               |                                     |         |
| Δ log <i>k</i>                                                   | ± 0.05                              | 298     |
| Δ E/R                                                            | ± 200                               | 220-370 |



### Comments on Preferred Values

The kinetics determinations are in generally good agreement. The preferred value of  $E/R$  is based on the average of those reported by Huie and Herron (1975) and Treacy et al. (1992), which are in good agreement. The preferred value of  $k$  at 298 K is an average of the room temperature determinations reported by Huie and Herron (1975), Atkinson et al. (1983), Treacy et al. (1992), Greene and Atkinson (1992) and Wegener et al. (2007), corrected to 298 K, where necessary, using the preferred value of  $E/R$ . These values agree to within  $\pm 7\%$  of the preferred value. The earlier tabulated determinations of Cox and Penkett (1972), Finlayson et al. (1974) and Japar et al. (1974) are also consistent with this recommendation, deviating by less than 25 % from the preferred value.

It is well established that the reaction proceeds by initial addition of  $O_3$  to form an energy-rich “primary ozonide (POZ)” which rapidly decomposes to form acetaldehyde,  $CH_3CHO$ , and one or other of the (excited) Criegee intermediate conformers,  $[E-CH_3CHOO]^*$  and  $[Z-CH_3CHOO]^*$ , as represented in the schematic shown below. Some features of the further chemistry are also shown, with suggested approximate contributions of a number of product pathways at 298 K and atmospheric pressure inferred from reported end product studies.

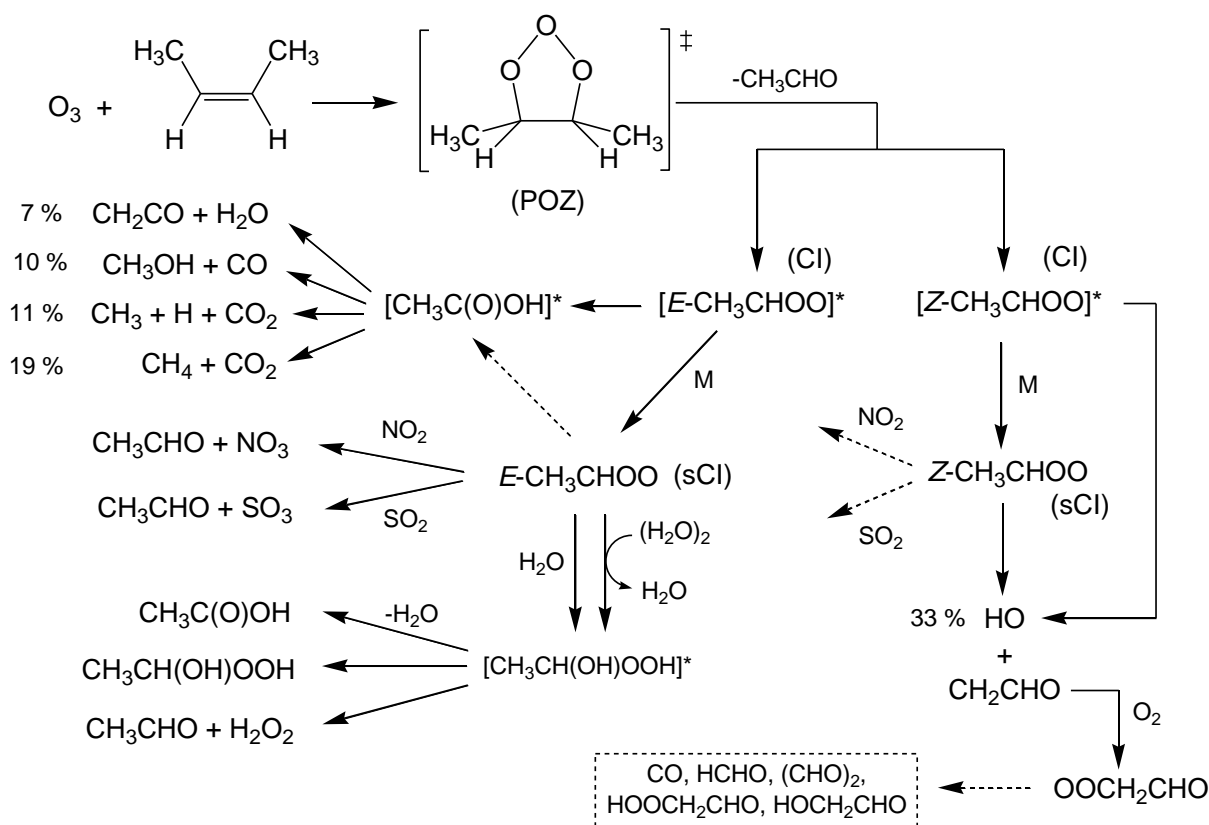

It should be noted that the contributions of the pathways differ from those suggested for  $[E-CH_3CHOO]^*$  and  $[Z-CH_3CHOO]^*$  formed from the reactions of  $O_3$  with both propene (datasheet Ox\_VOC6) and *trans*-but-2-ene (datasheet Ox\_VOC18), indicating that the fates of the Criegee intermediates are probably sensitive to their level of excitation, and that this can differ from one system to another.  $[E-CH_3CHOO]^*$  and  $[Z-CH_3CHOO]^*$  may either decompose via a number of possible pathways, or be collisionally deactivated to form the corresponding stabilized Criegee intermediates (sCI), i.e.  $E-CH_3CHOO$  and  $Z-CH_3CHOO$  (Fenske et al., 2000a).

Direct and indirect evidence for the formation of HO radicals has been reported in numerous studies (e.g. Atkinson and Aschmann, 1993; McGill et al., 1999; Orzechowska and Paulson, 2002; Wegener et al., 2007; Alam et al., 2013), with yields in the range 18–41 % (preferred value,  $33 \pm 7\%$ ). HO is expected to be formed mainly from either  $[Z-CH_3CHOO]^*$  or  $Z-CH_3CHOO$ , by an accepted

decomposition mechanism involving abstraction of a  $\beta$ -hydrogen via a vinyl hydroperoxide intermediate (Fenske et al., 2000b; Kroll et al., 2001), also forming the vinoxy radical ( $\text{CH}_2\text{CHO}$ ) as a co-product.  $\text{CH}_2\text{CHO}$  reacts with  $\text{O}_2$  under atmospheric conditions. At 1 bar, this is expected to form a stabilized peroxy radical, which can undergo conventional bimolecular reactions (e.g. with  $\text{NO}$ ,  $\text{HO}_2$  and other peroxy radicals) to form a number of products as shown. These include  $\text{HCHO}$  which has been reported to be formed with yields in the range 13-18 % in a number of studies (Horie et al., 1994; 1997; Grosjean et al., 1996; Tuazon et al., 1997) and glyoxal,  $(\text{CHO})_2$ , which has been reported to be formed with a yield of about 7 % (Tuazon et al., 1997). At pressures below about 270 mbar, the (chemically-activated) peroxy radical adduct has also been reported to decompose (e.g. to form  $\text{HO} + \text{HCHO} + \text{CO}$ ), thereby providing a small secondary source of  $\text{HO}$  radicals (Oguchi et al., 2004).

Evidence for the decomposition pathways for  $[\text{E-CH}_3\text{CHOO}]^*$  shown in the schematic (proceeding via formation of “hot” acetic acid,  $[\text{CH}_3\text{C}(\text{O})\text{OH}]^*$ ) has been reported in a number of studies, with the suggested contributions approximately based on the yields of  $\text{CO}_2$ , methane ( $\text{CH}_4$ ), methanol ( $\text{CH}_3\text{OH}$ ) and ketene ( $\text{CH}_2\text{CO}$ ) reported by Tuazon et al. (1997) and Horie et al. (1997), and  $\text{HO}_2$  (formed from reaction of  $\text{H}$  with  $\text{O}_2$ ) reported by Alam et al. (2013).

The total yield of stabilized Criegee intermediates ( $\text{E-CH}_3\text{CHOO}$  and  $\text{Z-CH}_3\text{CHOO}$ ) in the system has been measured in a number of studies, with reported values in the range 18–43 %. The preferred value,  $38 \pm 10$  %, is based on that measured by Newland et al. (2015), using scavenging with added  $\text{SO}_2$  and quantification of  $\text{SO}_2$  removed. Consistent with this,  $\text{CH}_3\text{CHO}$  yields slightly greater than unity (1.1-1.2) have been reported in a number of studies in the presence of  $\text{H}_2\text{O}$  (Grosjean et al., 1996; Tuazon et al., 1997; Wegener et al., 2007), suggesting a  $\text{CH}_3\text{CHO}$  yield of about 10-20 % from the reactions of  $\text{sCI}$  under these conditions. Based on the reported rate coefficients for their reactions with  $\text{H}_2\text{O}$ , and the relatively rapid decomposition of  $\text{Z-CH}_3\text{CHOO}$ , it is possible that only  $\text{E-CH}_3\text{CHOO}$  is scavenged significantly by reaction with  $\text{H}_2\text{O}$  in these studies.

Based on reported kinetic data (summarised and evaluated in datasheets CGI\_15 to CGI\_17), the major fate of  $\text{E-CH}_3\text{CHOO}$  under tropospheric conditions is expected to be removal via bimolecular reactions, in particular with  $\text{H}_2\text{O}$  and  $(\text{H}_2\text{O})_2$ , as illustrated in the schematic above. The major fate of  $\text{Z-CH}_3\text{CHOO}$  is expected to be thermal decomposition, as described above.

## References

- Alam, M. S., Rickard, A. R., Camredon, M., Wyche, K. P., Carr, T., Hornsby, K. E., Monks, P. S. and Bloss, W. J.: J. Phys. Chem., 117, 12468, 2013.
- Atkinson, R., Aschmann, S. M., Carter, W. P. L. and Pitts Jr., J. N.: Int. J. Chem. Kinet., 15, 721, 1983.
- Atkinson, R. and Aschmann, S. M.: Environ. Sci. Technol., 27, 1357, 1993.
- Cox, R. A. and Penkett, S. A.: J. Chem. Soc., Faraday Trans. 1, 68, 1735, 1972.
- Fenske, J. D., Hasson, A. S., Ho, A. W. and Paulson, S. E.: J. Phys. Chem. A, 104, 9921, 2000a.
- Fenske, J. D., Hasson, A. S., Paulson, S. E., Kuwata, K. T., Ho, A. and Houk, K. N.: J. Phys. Chem. A, 104, 7821, 2000b.
- Finlayson, B. J., Pitts, J. N. and Atkinson R.: J. Am. Chem. Soc., 96, 5356, 1974.
- Greene, C. R. and Atkinson, R.: Int. J. Chem. Kinet., 24, 803, 1992.
- Grosjean, E., de Andrade, J. B. and Grosjean, D.: Environ. Sci. Technol., 30, 975, 1996.
- Horie, O., Neeb, P. and Moortgat, G. K.: Int. J. Chem. Kinet., 26, 1075, 1994.
- Horie, O., Neeb, P. and Moortgat, G. K.: Int. J. Chem. Kinet., 29, 461, 1997.
- Huie, R. E. and Herron, J. T.: Int. J. Chem. Kinet., Symp. 1, 165, 1975.
- Japar, S. M., Wu, C. H. and Niki, H.: J. Phys. Chem., 78, 2318, 1974.
- Kroll, J. H., Sahay, S. R., Anderson, J. G., Demerjian, K. L. and Donahue, N. M.: J. Phys. Chem. A, 105, 4446, 2001.
- McGill, C. D., Rickard, A. R., Johnson, D. and Marston, G.: Chemosphere, 38, 1205, 1999.

Newland, M. J., Rickard, A. R., Alam, M. S., Vereecken, L., Muñoz, A., Ródenas, M. and Bloss, W. J.: Phys. Chem. Chem. Phys., 17, 4076, 2015.

Oguchi, T, Sato, Y., Matsui, H., 18th Symposium on Gas Kinetics, Bristol, UK, 2004. Poster B13.

Orzechowska, G. and Paulson, S. E.: Atmos. Environ., 36, 571, 2002.

Treacy, J., El Hag, M., O'Farrell, D. and Sidebottom, H.: Ber. Bunsenges. Phys. Chem., 96, 422, 1992.

Tuazon, E. C., Aschmann, S. M., Arey, J. and Atkinson, R.: Environ. Sci. Technol., 31, 3004, 1997.

Wegener, R., Brauers, T., Koppmann, R., Bares, S. R., Rohrer, F., Tillmann, R., Wahner, A., Hansel, A. and Wisthaler, A.: J. Geophys. Res. Atmos., 112, 2007, doi: 10.1029/2006JD007531.

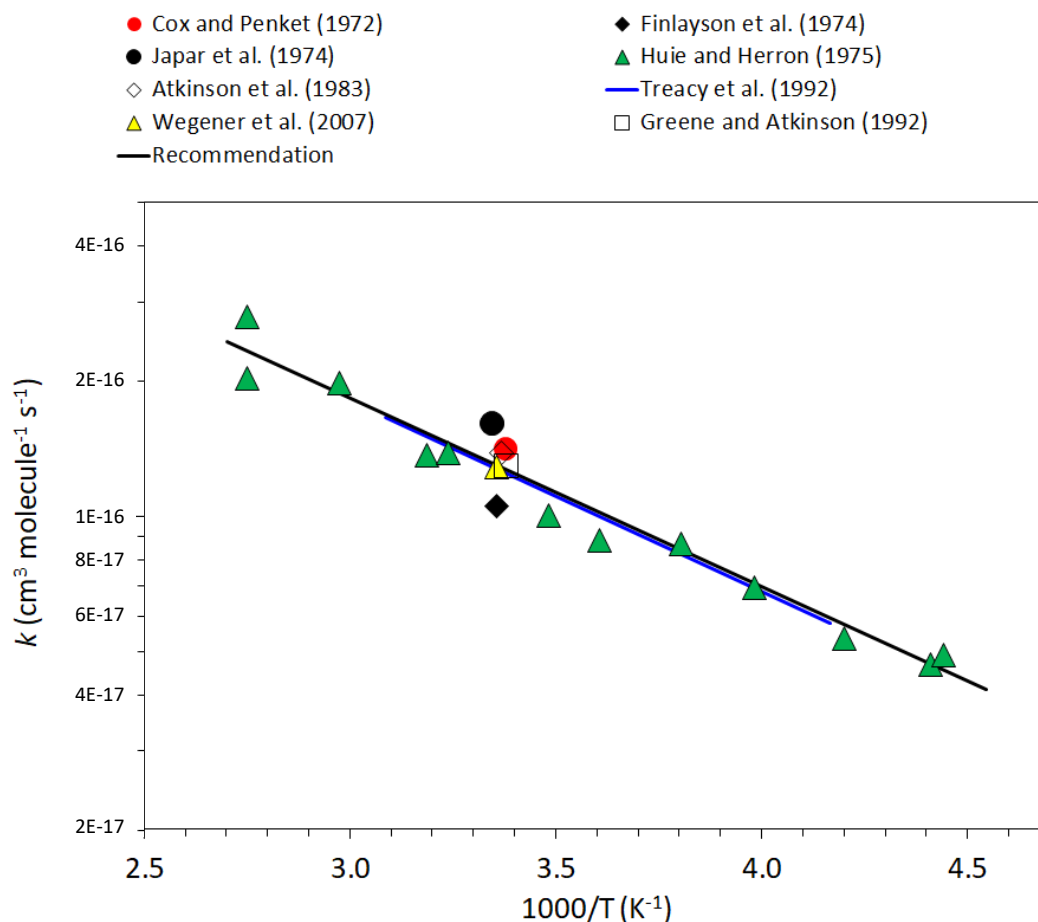

**Ox\_VOC18: *trans*-but-2-ene**

Last evaluated: March 2020; Last change in preferred values: July 2018

**O<sub>3</sub> + *trans*-but-2-ene → products****Rate coefficient data**

| $k/\text{cm}^3 \text{ molecule}^{-1} \text{ s}^{-1}$ | Temp./K     | Reference                 | Technique/Comments  |
|------------------------------------------------------|-------------|---------------------------|---------------------|
| <i>Absolute Rate Coefficients</i>                    |             |                           |                     |
| $2.57 \times 10^{-16}$                               | 296         | Cox and Penkett, 1972     | S-CL/GC-FID (a)     |
| $(2.75 \pm 0.23) \times 10^{-16}$                    | $299 \pm 2$ | Stedman et al., 1973      | S-CL (a)            |
| $(2.60 \pm 0.09) \times 10^{-16}$                    | $299 \pm 2$ | Japar et al., 1974        | S-CL/GC-FID (a)     |
| $5.96 \times 10^{-15} \exp[-(1051 \pm 43)/T]$        | 225-364     | Huie and Herron, 1975     | MS/MS (a)           |
| $1.76 \times 10^{-16}$                               | 298*        |                           |                     |
| $(2.56 \pm 0.15) \times 10^{-16}$                    | $299 \pm 2$ | Japar et al., 1976        | S-CL/GC-FID (a),(b) |
| $2.88 \times 10^{-16}$                               | $294 \pm 2$ | Adeniji et al., 1981      | S-CL (a)            |
| $6.7 \times 10^{-15} \exp[-(1066 \pm 115)/T]$        | 240-324     | Treacy et al., 1992       | S-CL (a)            |
| $(1.81 \pm 0.06) \times 10^{-16}$                    | 298         |                           |                     |
| $(2.38 \pm 0.15) \times 10^{-16}$                    | 298         | Wegener et al., 2007      | S-UVA/GC-FID (c)    |
| <i>Relative Rate Coefficients</i>                    |             |                           |                     |
| $(2.10 \pm 0.10) \times 10^{-16}$                    | $297 \pm 2$ | Nolting et al., 1988      | RR/GC-FID (d)       |
| $(2.17 \pm 0.15) \times 10^{-16}$                    | $296 \pm 2$ | Greene and Atkinson, 1992 | RR/GC-FID (e)       |
| $5.86 \times 10^{-15} \exp[-(1149 \pm 54)/T]$        | 278-353     | Avzianova and Ariya, 2002 | RR/GC-FID (f)       |
| $(1.86 \pm 0.12) \times 10^{-16}$                    | 298         |                           |                     |

**Comments**

- (a)  $k$  determined from the observed first-order rate of ozone decay (measured by the first technique shown) in the presence of known excess concentrations of *trans*-but-2-ene (measured either by the second technique shown, or with the initial concentration determined by quantified dilution of the pure gas).
- (b) Experiments carried out in air and helium diluent gas. The rate coefficient in the table is that measured in air. A slightly higher rate coefficient of  $(2.83 \pm 0.07) \times 10^{-16} \text{ cm}^3 \text{ molecule}^{-1} \text{ s}^{-1}$  was measured in helium diluent, consistent with data from a comprehensive study of the effects of O<sub>2</sub> on the measured rate coefficients for O<sub>3</sub> + propene, which showed that secondary reactions occurred in the absence of O<sub>2</sub>.
- (c) Experiments carried out with comparable concentrations of each reagent, in the presence of excess CO as an HO radical scavenger. The system was simulated using an explicit chemical mechanism, with  $k$  optimized to recreate the observed decays in the concentrations of ozone (measured by the first technique shown) and *trans*-but-2-ene (measured by the second technique shown).
- (d) The concentrations of *trans*-but-2-ene and *cis*-but-2-ene (the reference compound) were measured in the presence of O<sub>3</sub> by GC. It appears from the publication that an HO radical scavenger was not present. The measured rate coefficient ratio  $k(\text{O}_3 + \textit{trans}\text{-but-2-ene})/k(\text{O}_3 + \textit{cis}\text{-but-2-ene})$  is placed on an absolute basis using  $k(\text{O}_3 + \textit{cis}\text{-but-2-ene}) = 1.29 \times 10^{-16} \text{ cm}^3 \text{ molecule}^{-1} \text{ s}^{-1}$  at 297 K (IUPAC, current recommendation).
- (e) Relative rate study, with *n*-octane present to scavenge HO radicals. The concentrations of *trans*-but-2-ene and propene (the reference compound) were measured by GC. The measured value of

$k(\text{O}_3 + \text{trans-but-2-ene})/k(\text{O}_3 + \text{propene}) = 21.5 \pm 1.5$  is placed on an absolute basis using  $k(\text{O}_3 + \text{propene}) = 1.01 \times 10^{-17} \text{ cm}^3 \text{ molecule}^{-1} \text{ s}^{-1}$  at 296 K (IUPAC, current recommendation).

- (f) Relative rate method carried out at 760 Torr (1.013 bar) of air diluent in a 3 L volume Pyrex reactor, with 1,3,5-trimethylbenzene being present to scavenge the HO radicals formed. The concentrations of *trans*-but-2-ene and *cis*-but-2-ene (the reference compound) were monitored by GC. The measured rate coefficient ratios were placed on an absolute basis by Avzianova and Ariya (2002) using the Arrhenius expression of Treacy et al. (1992) for  $\text{O}_3 + \text{cis-but-2-ene}$ . The measured rate coefficient ratios were not tabulated, except at room temperature, assumed to be 298 K. The rate coefficient ratio  $k(\text{O}_3 + \text{trans-but-2-ene})/k(\text{O}_3 + \text{cis-but-2-ene}) = 1.74 \exp[-(179 \pm 54)/T]$ , derived from the data provided in Avzianova and Ariya (2002), is placed on an absolute basis using  $k(\text{O}_3 + \text{cis-but-2-ene}) = 3.37 \times 10^{-15} \exp(-970/T) \text{ cm}^3 \text{ molecule}^{-1} \text{ s}^{-1}$  (IUPAC, current recommendation). The 298 K rate coefficient calculated from the Arrhenius expression ( $1.24 \times 10^{-16} \text{ cm}^3 \text{ molecule}^{-1} \text{ s}^{-1}$ ) is a factor of 1.5 lower than the room temperature rate coefficient cited by Avzianova and Ariya (2002). The Arrhenius expression reported by Avzianova and Ariya (2002) therefore appears to be in error.

### Preferred Values

| Parameter                                              | Value                               | T/K     |
|--------------------------------------------------------|-------------------------------------|---------|
| $k / \text{cm}^3 \text{ molecule}^{-1} \text{ s}^{-1}$ | $2.0 \times 10^{-16}$               | 298     |
| $k / \text{cm}^3 \text{ molecule}^{-1} \text{ s}^{-1}$ | $7.0 \times 10^{-15} \exp(-1060/T)$ | 220-370 |
| <i>Reliability</i>                                     |                                     |         |
| $\Delta \log k$                                        | $\pm 0.1$                           | 298     |
| $\Delta E/R$                                           | $\pm 200$                           | 220-370 |

### Comments on Preferred Values

The preferred value of  $E/R$  is based on the average of those reported by Huie and Herron (1975) and Treacy et al. (1992), which are in good agreement. The Arrhenius parameters given by Avzianova and Ariya (2002) are inconsistent with the reported room temperature value of  $k$  (see comment (f)), although their value of  $E/R$  lies within the uncertainty bounds assigned to the preferred value.

There is some disagreement in the reported room temperature values of  $k$ . The preferred value of  $k$  at 298 K is based on the average of the direct determinations of Huie and Herron (1975), Treacy et al. (1992) and Wegener et al. (2007) and the relative rate determinations of Greene and Atkinson (1992) and Avzianova and Ariya (2002), corrected to 298 K, where necessary, using the preferred value of  $E/R$ . These values are in reasonable agreement, lying within  $\pm 20\%$  of the preferred value. The relative rate experiments of Nolting et al. (1988) were apparently carried out without an ozone scavenger, although their reported value of  $k$  is consistent with the recommendation. The remaining absolute determinations report values of  $k$  lying about 30-50 % higher than the preferred value.

It is well established that the reaction proceeds by initial addition of  $\text{O}_3$  to form an energy-rich “primary ozonide (POZ)” which rapidly decomposes to form acetaldehyde,  $\text{CH}_3\text{CHO}$ , and one or other of the (excited) Criegee intermediate conformers,  $[E\text{-CH}_3\text{CHOO}]^*$  and  $[Z\text{-CH}_3\text{CHOO}]^*$ , as represented in the schematic shown below. Some features of the further chemistry are also shown, with suggested approximate contributions of a number of product pathways at 298 K and atmospheric pressure inferred from reported end product studies.

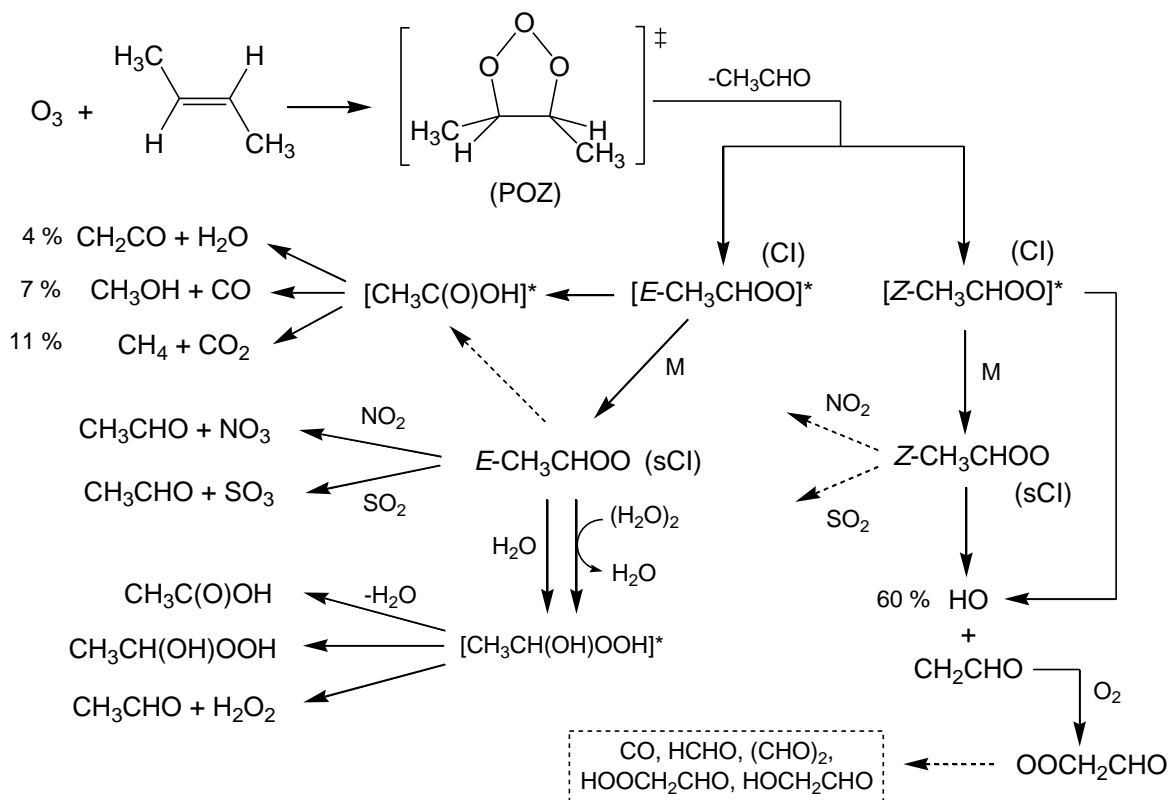

It should be noted that the contributions of the pathways differ from those suggested for  $[E-\text{CH}_3\text{CHOO}]^*$  and  $[Z-\text{CH}_3\text{CHOO}]^*$  formed from the reactions of  $\text{O}_3$  with both propene (datasheet Ox\_VOC6) and *cis*-but-2-ene (datasheet Ox\_VOC17), indicating that the fates of the Criegee intermediates are probably sensitive to their level of excitation, and that this can differ from one system to another.  $[E-\text{CH}_3\text{CHOO}]^*$  and  $[Z-\text{CH}_3\text{CHOO}]^*$  may either decompose via a number of possible pathways, or be collisionally deactivated to form the corresponding stabilized Criegee intermediates (sCI), i.e.  $E-\text{CH}_3\text{CHOO}$  and  $Z-\text{CH}_3\text{CHOO}$  (Fenske et al., 2000a).

Direct and indirect evidence for the formation of HO radicals has been reported in numerous studies (e.g. Atkinson and Aschmann, 1993; McGill et al., 1999; Orzechowska and Paulson, 2002; Hasson et al., 2003; Wegener et al., 2007; Alam et al., 2013), with yields in the range 54–64 % (preferred value,  $60 \pm 6$  %) reported at atmospheric pressure. Similar yields have also been reported at low pressures by Donahue et al. (1998), ( $68 \pm 9$  %), and Kroll et al. (2001),  $\sim 60$  %. HO is expected to be formed mainly from either  $[Z-\text{CH}_3\text{CHOO}]^*$  or  $Z-\text{CH}_3\text{CHOO}$ , by an accepted decomposition mechanism involving abstraction of a  $\beta$ -hydrogen via a vinyl hydroperoxide intermediate (Fenske et al., 2000b; Kroll et al., 2001), also forming the vinyloxy radical ( $\text{CH}_2\text{CHO}$ ) as a co-product.  $\text{CH}_2\text{CHO}$  reacts with  $\text{O}_2$  under atmospheric conditions. At 1 bar, this is expected to form a stabilized peroxy radical, which can undergo conventional bimolecular reactions (e.g. with NO,  $\text{HO}_2$  and other peroxy radicals) to form a number of products as shown. These include HCHO which has been reported to be formed with yields in the range 13–29 % in a number of studies (Horie et al., 1994; 1997; Grosjean et al., 1996; Tuazon et al., 1997) and glyoxal,  $(\text{CHO})_2$ , which has been reported to be formed with a yield of about 10 % (Tuazon et al., 1997). At pressures below about 270 mbar, the (chemically-activated) peroxy radical adduct has also been reported to decompose (e.g. to form  $\text{HO} + \text{HCHO} + \text{CO}$ ), thereby providing a small secondary source of HO radicals (Oguchi et al., 2004).

Evidence for the decomposition pathways for  $[E-\text{CH}_3\text{CHOO}]^*$  shown in the schematic (proceeding via formation of “hot” acetic acid,  $[CH_3C(O)OH]^*$ ) has been reported in a number of studies, with the suggested contributions approximately based on the yields of methane ( $\text{CH}_4$ ), methanol ( $\text{CH}_3\text{OH}$ ) and

ketene ( $\text{CH}_2\text{CO}$ ) reported by Tuazon et al. (1997) and Horie et al. (1997). However, the reported yields of  $\text{CO}_2$  in the same studies (about 23–29%) are not fully accounted for by these contributions.

There have been a number of determinations of the yield of the stabilized Criegee intermediates (*E*- $\text{CH}_3\text{CHOO}$  and *Z*- $\text{CH}_3\text{CHOO}$ ), mainly based on addition of scavengers ( $\text{H}_2\text{O}$ ,  $\text{SO}_2$  and  $\text{CF}_3\text{C}(\text{O})\text{CF}_3$ ) to the system and quantification of the associated reaction products (Cox and Penkett, 1972; Hatakeyama and Akimoto, 1994; Rickard et al., 1999; Horie et al., 1999; Hasson et al., 2001; Berndt et al., 2014; Newland et al., 2015; Hakala and Donahue, 2018). The reported yields show some disagreement, lying in the range 13–53 % (preferred value  $43 \pm 10$  %). Consistent with this,  $\text{CH}_3\text{CHO}$  yields slightly greater than unity (1.1–1.2) have been reported in a number of studies in the presence of  $\text{H}_2\text{O}$  (Grosjean et al., 1996; Tuazon et al., 1997; Hasson et al., 2001), suggesting a  $\text{CH}_3\text{CHO}$  yield of about 10–20 % from the reactions of sCI under these conditions. Based on the reported rate coefficients for their reactions with  $\text{H}_2\text{O}$ , and the relatively rapid decomposition of *Z*- $\text{CH}_3\text{CHOO}$ , it is possible that only *E*- $\text{CH}_3\text{CHOO}$  is scavenged significantly by reaction with  $\text{H}_2\text{O}$  in these studies.

Based on reported kinetic data (summarised and evaluated in datasheets CGI\_15 to CGI\_17), the major fate of *E*- $\text{CH}_3\text{CHOO}$  under tropospheric conditions is expected to be removal via bimolecular reactions, in particular with  $\text{H}_2\text{O}$  and  $(\text{H}_2\text{O})_2$ , as illustrated in the schematic above. The major fate of *Z*- $\text{CH}_3\text{CHOO}$  is expected to be thermal decomposition, as described above.

## References

- Adeniji, A. A., Kerr, J. A. and Williams, M. R.: *Int. J. Chem. Kinet.*, 13, 209, 1981.
- Alam, M. S., Rickard, A. R., Camredon, M., Wyche, K. P., Carr, T., Hornsby, K. E., Monks, P. S. and Bloss, W. J.: *J. Phys. Chem.*, 117, 12468, 2013.
- Atkinson, R. and Aschmann, S. M.: *Environ. Sci. Technol.*, 27, 1357, 1993.
- Avzianova, E. V. and Ariya, P. A.: *Int. J. Chem. Kinet.*, 34, 678, 2002.
- Berndt, T., Jokinen, T., Sipilä, M., Mauldin, R. L., Herrmann, H., Stratmann, F., Junninen, H. and Kulmala, M.: *Atmos. Environ.*, 89, 603, 2014.
- Cox, R. A. and Penkett, S. A.: *J. Chem. Soc., Faraday Trans. 1*, 68, 1735, 1972.
- Donahue, N. M., Kroll, J. H., Anderson, J. G. and Demerjian, K. L.: *Geophys. Res. Lett.*, 25, 59, 1998.
- Fenske, J. D., Hasson, A. S., Ho, A. W. and Paulson, S. E.: *J. Phys. Chem. A*, 104, 9921, 2000a.
- Fenske, J. D., Hasson, A. S., Paulson, S. E., Kuwata, K. T., Ho, A. and Houk, K. N.: *J. Phys. Chem. A*, 104, 7821, 2000b.
- Greene, C. R. and Atkinson, R.: *Int. J. Chem. Kinet.*, 24, 803, 1992.
- Grosjean, E., de Andrade, J. B. and Grosjean, D.: *Environ. Sci. Technol.*, 30, 975, 1996.
- Hakala, J. P. and Donahue, N. M.: *J. Phys. Chem. A*, 122, 9426, 2018.
- Hatakeyama, S. and Akimoto, H.: *Res. Chem. Intermed.*, 20, 503, 1994.
- Hasson, A. S., Orzechowska, G. and Paulson, S. E.: *J. Geophys. Res.*, 106, 34131, 2001.
- Hasson, A. S., Chung, M. Y., Kuwata, K. T., Converse, A. D., Krohn, D. and Paulson, S. E.: *J. Phys. Chem. A*, 107, 6176, 2003.
- Horie, O., Neeb, P. and Moortgat, G. K.: *Int. J. Chem. Kinet.*, 26, 1075, 1994.
- Horie, O., Neeb, P. and Moortgat, G. K.: *Int. J. Chem. Kinet.*, 29, 461, 1997.
- Horie, O., Schafer, C. and Moortgat, G. K.: *Int. J. Chem. Kinet.*, 31, 261, 1999.
- Huie, R. E. and Herron, J. T.: *Int. J. Chem. Kinet., Symp. 1*, 165, 1975.
- Japar, S. M., Wu, C. H. and Niki, H.: *J. Phys. Chem.*, 78, 2318, 1974.
- Japar, S. M., Wu, C. H. and Niki, H.: *J. Phys. Chem.*, 80, 2057, 1976.
- Kroll, J. H., Sahay, S. R., Anderson, J. G., Demerjian, K. L. and Donahue, N. M.: *J. Phys. Chem. A*, 105, 4446, 2001.
- McGill, C. D., Rickard, A. R., Johnson, D. and Marston, G.: *Chemosphere*, 38, 1205, 1999.
- Newland, M. J., Rickard, A. R., Alam, M. S., Vereecken, L., Muñoz, A., Ródenas, M. and Bloss, W. J.: *Phys. Chem. Chem. Phys.*, 17, 4076, 2015.

Oguchi, T, Sato, Y., Matsui, H., 18th Symposium on Gas Kinetics, Bristol, UK, 2004. Poster B13.  
 Orzechowska, G. and Paulson, S. E.: Atmos. Environ., 36, 571, 2002.  
 Nolting, F., Behnke, W. and Zetzsch, C.: J. Atmos. Chem., 6, 47, 1988.  
 Rickard, A. R., Johnson, D., McGill, C. D. and Marston, G.: J. Phys. Chem. A, 103, 7656, 1999.  
 Stedman, D. H., Wu, C. H. and Niki, H.: J. Phys. Chem., 77, 2511, 1973.  
 Treacy, J., El Hag, M., O'Farrell, D. and Sidebottom, H.: Ber. Bunsenges. Phys. Chem., 96, 422, 1992.  
 Tuazon, E. C., Aschmann, S. M., Arey, J. and Atkinson, R.: Environ. Sci. Technol., 31, 3004, 1997.  
 Wegener, R., Brauers, T., Koppmann, R., Bares, S. R., Rohrer, F., Tillmann, R., Wahner, A., Hansel, A. and Wisthaler, A.: J. Geophys. Res. Atmos., 112, 2007, doi: 10.1029/2006JD007531.

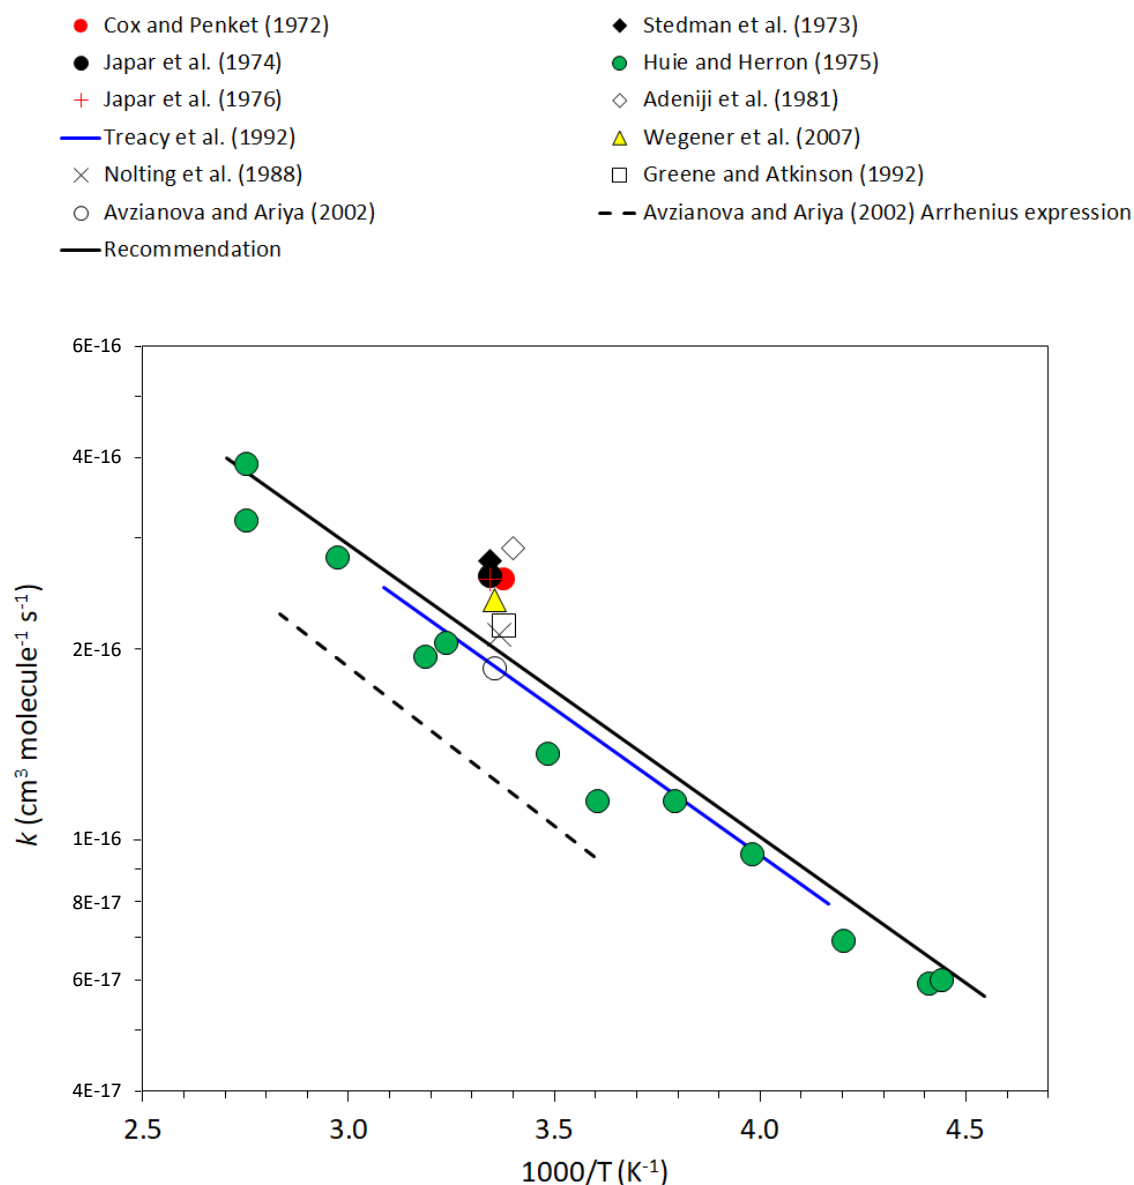



**Ox\_VOC15: 2-methylpropene**

Last evaluated: August 2020; Last change in preferred values: July 2018

**O<sub>3</sub> + 2-methylpropene → products****Rate coefficient data**

| <i>k</i> /cm <sup>3</sup> molecule <sup>-1</sup> s <sup>-1</sup> | Temp./K     | Reference                 | Technique/<br>Comments |
|------------------------------------------------------------------|-------------|---------------------------|------------------------|
| <i>Absolute Rate Coefficients</i>                                |             |                           |                        |
| $1.8 \times 10^{-17}$                                            | 283 ± 2     | Becker et al., 1974       | S-UVA (a)              |
| $(1.36 \pm 0.02) \times 10^{-17}$                                | 299 ± 2     | Japar et al., 1974        | S-CL/GC-FID (a)        |
| $3.17 \times 10^{-15} \exp[-(1671 \pm 23)/T]$                    | 225-363     | Huie and Herron, 1975     | MS/MS (a)              |
| $1.16 \times 10^{-17}$                                           | 298*        |                           |                        |
| $1.45 \times 10^{-17}$                                           | 295 ± 1     | Grimsrud et al., 1975     | F-CL (a)               |
| $1.2 \times 10^{-17}$                                            | 294 ± 2     | Adeniji et al., 1981      | S-CL (a)               |
| $2.5 \times 10^{-15} \exp[-(1592 \pm 115)/T]$                    | 240-324     | Treacy et al., 1992       | S-CL (a)               |
| $(1.09 \pm 0.18) \times 10^{-17}$                                | 298         |                           |                        |
| $1.24 \times 10^{-17}$                                           | 296 ± 2     | Neeb and Moortgat, 1999   | S-FTIR (b)             |
| $(1.11 \pm 0.12) \times 10^{-17}$                                | 298         | Wegener et al., 2007      | S-UVA/GC-FID (c)       |
| $3.39 \times 10^{-15} \exp[-(1697 \pm 52)/T]$                    | 295.6-349.8 | Shi et al., 2011          | S-UVA (a)              |
| $(1.09 \pm 0.02) \times 10^{-17}$                                | 295.6       |                           |                        |
| <i>Relative Rate Coefficients</i>                                |             |                           |                        |
| $(1.15 \pm 0.04) \times 10^{-17}$                                | 296 ± 2     | Greene and Atkinson, 1992 | RR/GC-FID (d)          |
| $1.89 \times 10^{-15} \exp[-(2122 \pm 102)/T]$                   | 278-353     | Avzianova and Ariya, 2002 | RR/GC-FID (e)          |
| $(1.10 \pm 0.07) \times 10^{-17}$                                | 298         |                           |                        |

**Comments**

- (a) *k* determined from the observed first-order rate of ozone decay (measured by the first technique shown) in the presence of known excess concentrations of 2-methylpropene (measured either by the second technique shown, or with the initial concentration determined by quantified dilution of the pure gas).
- (b) *k* determined from the observed first-order rate of propene decay in the presence of known excess concentrations of ozone, with both reagents measured by FTIR. Cyclohexane added to scavenge HO radicals.
- (c) Experiments carried out with comparable concentrations of each reagent, in the presence of excess CO as an HO radical scavenger. The system was simulated using an explicit chemical mechanism, with *k* optimized to recreate the observed decays in the concentrations of ozone (measured by the first technique shown) and 2-methylpropene (measured by the second technique shown).
- (d) Relative rate study, with *n*-octane present to scavenge HO radicals. The concentrations of 2-methylpropene and propene (the reference compound) were measured by GC. The measured value of  $k(\text{O}_3 + 2\text{-methylpropene})/k(\text{O}_3 + \text{propene}) = 1.14 \pm 0.04$  is placed on an absolute basis using  $k(\text{O}_3 + \text{propene}) = 1.01 \times 10^{-17} \text{ cm}^3 \text{ molecule}^{-1} \text{ s}^{-1}$  at 296 K (IUPAC, current recommendation).
- (e) Relative rate method carried out at 760 Torr (1.013 bar) of air diluent in a 3 L volume Pyrex reactor, with 1,3,5-trimethylbenzene being present to scavenge the HO radicals formed. The concentrations of 2-methylpropene and propene (the reference compound) were monitored by GC. The measured rate coefficient ratios were placed on an absolute basis by Avzianova and Ariya

(2002) using the Arrhenius expression of Treacy et al. (1992) for  $\text{O}_3 + \text{propene}$ . The measured rate coefficient ratios were not tabulated, except at room temperature, assumed to be 298 K. The rate coefficient ratio  $k(\text{O}_3 + 2\text{-methylpropene})/k(\text{O}_3 + \text{propene}) = 0.327 \exp[-(242 \pm 102)/T]$ , derived from the data provided in Avzianova and Ariya (2002), is placed on an absolute basis using  $k(\text{O}_3 + \text{propene}) = 5.5 \times 10^{-15} \exp(-1880/T) \text{ cm}^3 \text{ molecule}^{-1} \text{ s}^{-1}$  (IUPAC, current recommendation). The 298 K rate coefficient calculated from the Arrhenius expression ( $1.52 \times 10^{-18} \text{ cm}^3 \text{ molecule}^{-1} \text{ s}^{-1}$ ) is a factor of 7 lower than the room temperature rate coefficient cited by Avzianova and Ariya (2002), and their Arrhenius plots indicate that the temperature dependence for  $\text{O}_3 + 2\text{-methylpropene}$  is similar to that for  $\text{O}_3 + \text{but-1-ene}$  ( $E/R = 1750 \text{ K}$ ). The Arrhenius expression cited by Avzianova and Ariya (2002) is clearly in error.

### Preferred Values

| Parameter                                              | Value                                | T/K     |
|--------------------------------------------------------|--------------------------------------|---------|
| $k / \text{cm}^3 \text{ molecule}^{-1} \text{ s}^{-1}$ | $1.15 \times 10^{-17}$               | 298     |
| $k / \text{cm}^3 \text{ molecule}^{-1} \text{ s}^{-1}$ | $2.92 \times 10^{-15} \exp(-1650/T)$ | 220-370 |
| <i>Reliability</i>                                     |                                      |         |
| $\Delta \log k$                                        | $\pm 0.05$                           | 298     |
| $\Delta E/R$                                           | $\pm 200$                            | 220-370 |

### Comments on Preferred Values

The preferred value of  $E/R$  is based on the average of those reported by Huie and Herron (1975), Treacy et al. (1992) and Shi et al. (2011), which are in good agreement. The Arrhenius parameters given by Avzianova and Ariya (2002) are inconsistent with the reported room temperature value of  $k$  (see comment (e)), and their value of  $E/R$  is significantly greater than the preferred value.

The preferred value of  $k$  at 298 K is based on the average of the direct determinations of Huie and Herron (1975), Treacy et al. (1992), Wegener et al. (2007) and Shi et al. (2011) and the relative rate determinations of Greene and Atkinson (1992) and Avzianova and Ariya (2002), corrected to 298 K, where necessary, using the preferred value of  $E/R$ . These values are in very good agreement, lying within  $\pm 5 \%$  of the preferred value. The absolute determinations of Japar et al. (1974), Adeniji et al. (1981) and Neeb and Moorgat (1999) are also consistent with the preferred value, lying 12-16 % higher. Grimsrud et al. (1975) and Becker et al. (1983) report values of  $k$  lying about 30 % and a factor of two higher, respectively.

It is well established that the reaction proceeds by initial addition of  $\text{O}_3$  to form an energy-rich “primary ozonide” which rapidly decomposes to form two sets of primary carbonyl product plus (excited) Criegee intermediate, as shown in the schematic below. Reported yields of acetone ( $\text{CH}_3\text{C}(\text{O})\text{CH}_3$ ) and formaldehyde ( $\text{HCHO}$ ) suggest important contributions from both decomposition channels, (a) and (b), with  $\text{HCHO}$  also expected to have secondary sources (see below). Values of  $k_a/(k_a+k_b)$  lying in the range 0.28-0.35 can be inferred from the reported molar yields of acetone (Grosjean et al., 1996; Tuazon et al., 1997; Neeb and Moortgat, 1999; Newland et al., 2020), consistent with the value given in the schematic.

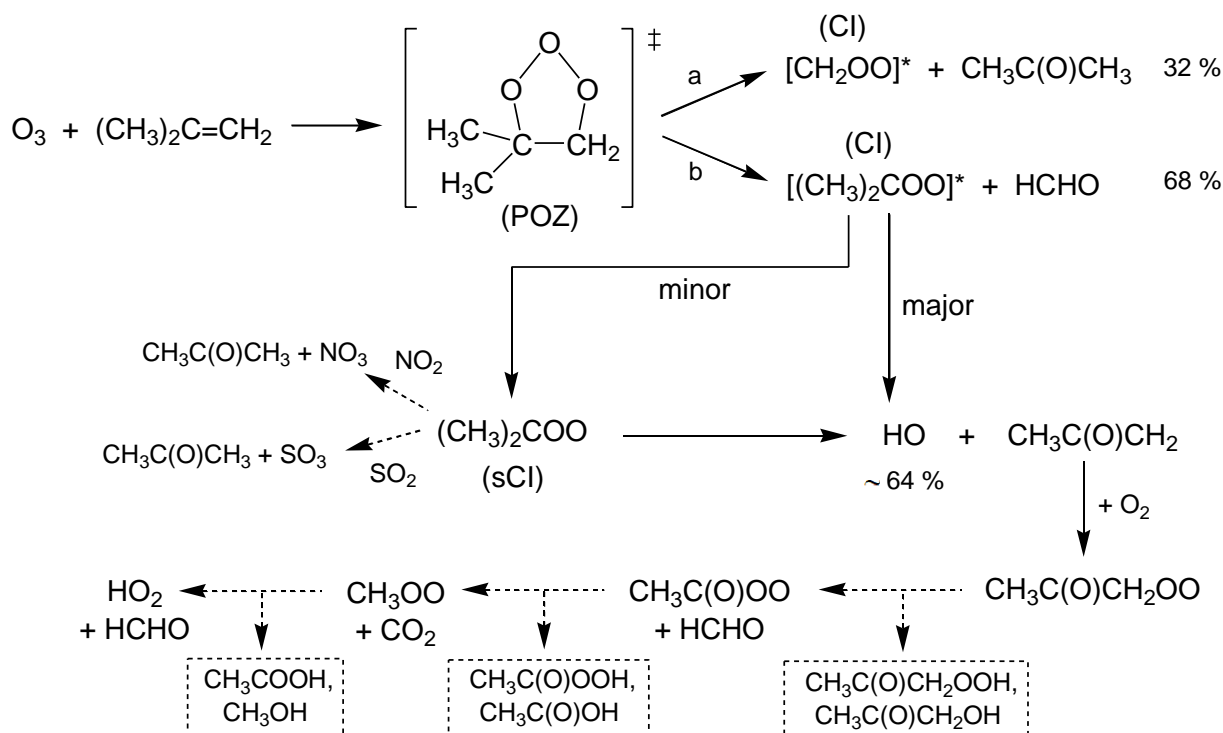

The further chemistry of  $[\text{CH}_2\text{OO}]^*$  is expected to follow the pathways described in the data sheet for the  $\text{O}_3 + \text{C}_2\text{H}_4$  reaction (Ox\_VOC5), although their relative importance is not necessarily the same. The schematic above shows some established features of the further chemistry of  $[(\text{CH}_3)_2\text{COO}]^*$ , with suggested approximate contributions of the product pathways at 298 K and atmospheric pressure inferred from reported end product studies.

$[(\text{CH}_3)_2\text{COO}]^*$  may either decompose, or be collisionally deactivated to form the stabilized Criegee intermediate  $(\text{CH}_3)_2\text{COO}$  (sCI). The total yield of stabilized Criegee intermediates (i.e.  $\text{CH}_2\text{OO}$  and  $(\text{CH}_3)_2\text{COO}$ ) has been determined by scavenging with added  $\text{SO}_2$  and quantifying the associated products,  $\text{H}_2\text{SO}_4$  (Hatekayama et al., 1986) or  $\text{HCHO}$  and  $\text{CH}_3\text{C}(\text{O})\text{CH}_3$  (Newland et al., 2020). The recommended total yield, based on these studies, is  $21 \pm 5 \%$ . Newland et al. (2020) report that  $\text{CH}_2\text{OO}$  and  $(\text{CH}_3)_2\text{COO}$  account for about 70 % and 30 % of the total sCI yield, respectively. Consistent with this, Neeb et al. (1997) inferred a yield of 13 % specifically for  $\text{CH}_2\text{OO}$ , based on scavenging with added  $\text{H}_2\text{O}$  and quantification of the product  $\text{HOCH}_2\text{OOH}$ . This suggests that the major fate of  $[(\text{CH}_3)_2\text{COO}]^*$  formed from 2-methylpropene ozonolysis is decomposition, with only a minor fraction stabilized to form  $(\text{CH}_3)_2\text{COO}$ .

The dominant decomposition route for both  $[(\text{CH}_3)_2\text{COO}]^*$  and  $(\text{CH}_3)_2\text{COO}$  is expected to form HO radicals by an accepted decomposition mechanism involving abstraction of a  $\beta$ -hydrogen via a vinyl hydroperoxide intermediate (Fenske et al., 2000; Kroll et al., 2001), also forming the 1-methylvinoxy or acetylonyl radical  $\text{CH}_3\text{C}(\text{O})\text{CH}_2$  as a co-product. Direct and indirect evidence for the formation of HO radicals has been reported in numerous studies (e.g. Atkinson and Aschmann, 1993; Neeb and Moortgat, 1999; Paulson et al., 1999; Rickard et al., 1999; Wegener et al., 2007; Alam et al., 2013), with yields in the range 60–84 % (preferred value, 69 %). A minor contribution to HO formation may also result from decomposition of  $[\text{CH}_2\text{OO}]^*$ . Assuming that the relative importance of the reaction pathways for  $[\text{CH}_2\text{OO}]^*$  formed from 2-methylpropene are similar to those for  $[\text{CH}_2\text{OO}]^*$  formed from ethene, this contribution is estimated to be about 5 %, suggesting that decomposition of  $[(\text{CH}_3)_2\text{COO}]^*$  and  $(\text{CH}_3)_2\text{COO}$  contributes about 64 %. Based on reported kinetic data (summarised and evaluated in datasheets CGI\_14 and CGI\_18 to CGI\_20), decomposition is also expected to be the major fate of  $(\text{CH}_3)_2\text{COO}$  under tropospheric conditions.

The acetyl radical ( $\text{CH}_3\text{C}(\text{O})\text{CH}_2$ ) reacts with  $\text{O}_2$  under atmospheric conditions. This is expected to form a stabilized peroxy radical, which can undergo conventional bimolecular reactions (e.g. with  $\text{NO}$ ,  $\text{HO}_2$  and other peroxy radicals) initiating reaction sequences forming a large number of potential products, with examples shown in the schematic. These include methyl glyoxal ( $\text{CH}_3\text{C}(\text{O})\text{CHO}$ ), hydroxyacetone ( $\text{CH}_3\text{C}(\text{O})\text{CH}_2\text{OH}$ ), methanol ( $\text{CH}_3\text{OH}$ ) and  $\text{CO}_2$ , which have been reported to be formed with respective yields of about 15 %, 7 %, 5 % and 28 % (Neeb and Moortgat, 1999; Tuazon et al., 1997).  $\text{CO}_2$  may also be formed from the decomposition of  $[\text{CH}_2\text{OO}]^*$ , with an estimated yield of about 7 % (assuming the relative importance of the pathways is similar to those in the ethene system). The chemistry also results in significant secondary formation of  $\text{HCHO}$ . Total molar yields in the range 95–119 % have been reported by Grosjean et al. (1996), Tuazon et al. (1997), Neeb and Moortgat (1999) and Newland et al. (2020), which is consistent with major primary and secondary sources in the system.

## References

- Adeniji, A. A., Kerr, J. A. and Williams, M. R.: *Int. J. Chem. Kinet.*, 13, 209, 1981.
- Alam, M. S., Rickard, A. R., Camredon, M., Wyche, K. P., Carr, T., Hornsby, K. E., Monks, P. S. and Bloss, W. J.: *J. Phys. Chem.*, 117, 12468, 2013.
- Becker, K. H., Schurath, U. and Seitz, H.: *Int. J. Chem. Kinet.*, 6, 725, 1974.
- Atkinson, R. and Aschmann, S. M.: *Environ. Sci. Technol.*, 27, 1357, 1993.
- Avzianova, E. V. and Ariya, P. A.: *Int. J. Chem. Kinet.*, 34, 678, 2002.
- Fenske, J. D., Hasson, A. S., Paulson, S. E., Kuwata, K. T., Ho, A. and Houk, K. N.: *J. Phys. Chem. A*, 104, 7821, 2000.
- Greene, C. R. and Atkinson, R.: *Int. J. Chem. Kinet.*, 24, 803, 1992.
- Grimsrud, E. P., Westberg, H. H. and Rasmussen, R. A.: *Int. J. Chem. Kinet., Symp. 1*, 183, 1975.
- Grosjean, E., de Andrade, J. B. and Grosjean, D.: *Environ. Sci. Technol.*, 30, 975, 1996.
- Huie, R. E. and Herron, J. T.: *Int. J. Chem. Kinet., Symp. 1*, 165, 1975.
- Japar, S. M., Wu, C. H. and Niki, H.: *J. Phys. Chem.*, 78, 2318, 1974.
- Kroll, J. H., Sahay, S. R., Anderson, J. G., Demerjian, K. L. and Donahue, N. M.: *J. Phys. Chem. A*, 105, 4446, 2001.
- Shi, Y. Z., Xu, Y. F. and Jia, L.: *Int. J. Chem. Kinet.*, 43, 238, 2011.
- Neeb, P. and Moortgat, G. K.: *J. Phys. Chem. A*, 103, 9003, 1999.
- Neeb, P., Sauer, F., Horie, O. and Moortgat, G. K.: *Atmos. Environ.*, 31, 1417, 1997.
- Newland, M. J., Nelson, B. S., Muñoz, A., Ródenas, M., Vera, T., Tárrega, J., and Rickard, A. R.: *Phys. Chem. Chem. Phys.*, 22, 13698, 2020.
- Paulson, S. E., Chung, M. Y., Hasson, A. S.: *J. Phys. Chem. A*, 103, 8125, 1999.
- Rickard, A. R., Johnson, D., McGill, C. D. and Marston, G.: *J. Phys. Chem. A*, 103, 7656, 1999.
- Treacy, J., El Hag, M., O'Farrell, D. and Sidebottom, H.: *Ber. Bunsenges. Phys. Chem.*, 96, 422, 1992.
- Tuazon, E. C., Aschmann, S. M., Arey, J. and Atkinson, R.: *Environ. Sci. Technol.*, 31, 3004, 1997.
- Wegener, R., Brauers, T., Koppmann, R., Bares, S. R., Rohrer, F., Tillmann, R., Wahner, A., Hansel, A. and Wisthaler, A.: *J. Geophys. Res. Atmos.*, 112, 2007, doi: 10.1029/2006JD007531.

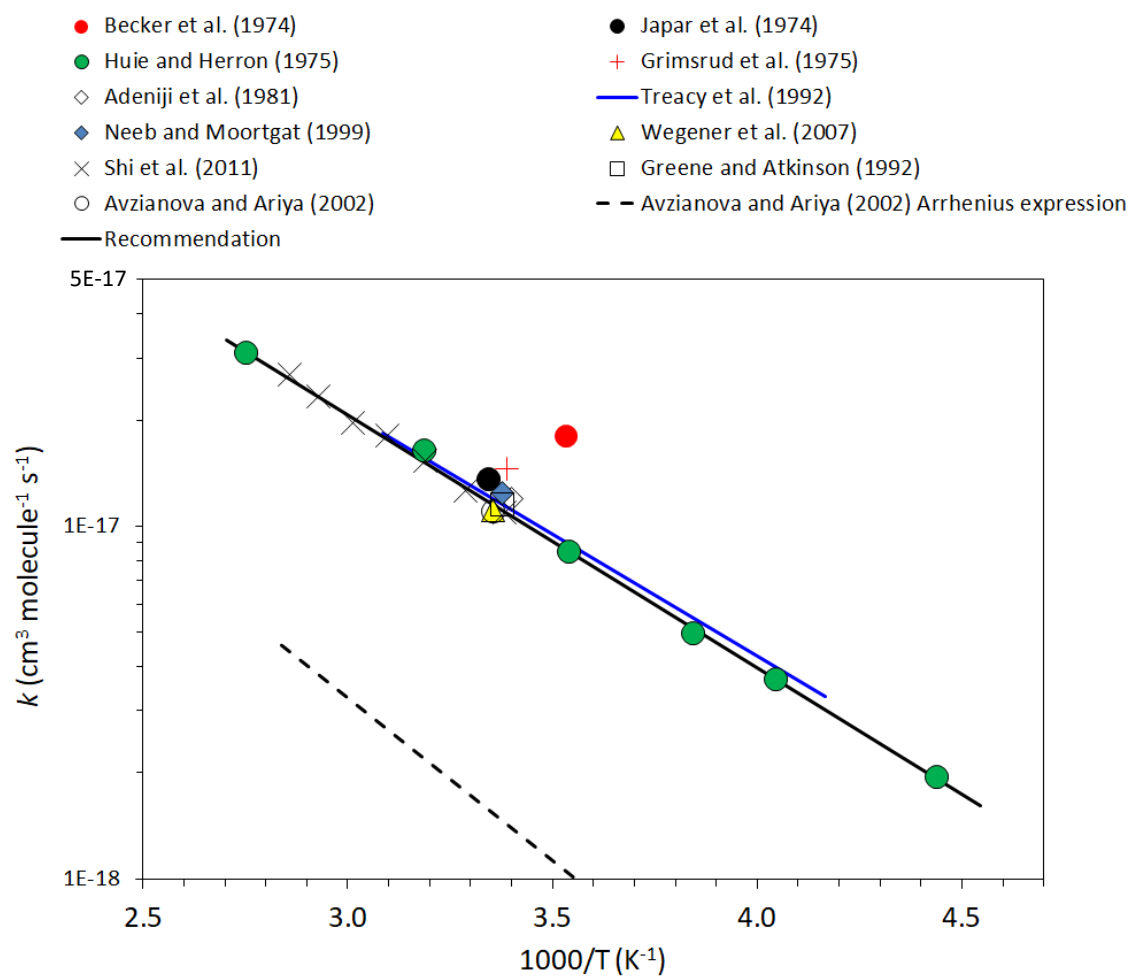

**Ox\_VOC41: 2,3-dimethylbut-2-ene**

Last evaluated: August 2020; Last change in preferred values: July 2018

**O<sub>3</sub> + 2,3-dimethylbut-2-ene → products****Rate coefficient data**

| <i>k</i> /cm <sup>3</sup> molecule <sup>-1</sup> s <sup>-1</sup> | Temp./K   | Reference                 | Technique/Comments |
|------------------------------------------------------------------|-----------|---------------------------|--------------------|
| <i>Absolute Rate Coefficients</i>                                |           |                           |                    |
| (1.51 ± 0.08) × 10 <sup>-15</sup>                                | 299 ± 2   | Japar et al., 1974        | S-CL/GC-FID (a)    |
| 2.82 × 10 <sup>-15</sup> exp[-(294 ± 196)/T]                     | 227-363   | Huie and Herron, 1975     | MS/MS (a)          |
| 1.05 × 10 <sup>-15</sup>                                         | 298*      |                           |                    |
| (1.0 ± 0.2) × 10 <sup>-15</sup>                                  | 295 ± 0.5 | Witter et al., 2002       | S-UVA/FTIR (b)     |
| <i>Relative Rate Coefficients</i>                                |           |                           |                    |
| (1.24 ± 0.11) × 10 <sup>-16</sup>                                | 296 ± 2   | Greene and Atkinson, 1992 | RR/GC-FID (c)      |

**Comments**

- (a) *k* determined from the observed first-order rate of ozone decay (measured by the first technique shown) in the presence of known excess concentrations of 2,3-dimethylbut-2-ene (measured by the second technique shown) in air.
- (b) Experiments carried out with comparable concentrations of each reagent, in the absence of an HO radical scavenger. The system was simulated using an explicit chemical mechanism, with *k* optimized to recreate the observed decays in the concentrations of ozone (measured by the first technique shown) and 2,3-dimethylbut-2-ene (measured by the second technique shown).
- (c) Relative rate study, with *n*-octane present to scavenge HO radicals. The concentrations of 2,3-dimethylbut-2-ene and propene (the reference compound) were measured by GC. The measured value of  $k(\text{O}_3 + 2,3\text{-dimethylbut-2-ene})/k(\text{O}_3 + \text{propene}) = 123 \pm 11$  is placed on an absolute basis using  $k(\text{O}_3 + \text{propene}) = 1.01 \times 10^{-17} \text{ cm}^3 \text{ molecule}^{-1} \text{ s}^{-1}$  at 296 K (IUPAC, current recommendation).

**Preferred Values**

| Parameter                                                        | Value                               | T/K     |
|------------------------------------------------------------------|-------------------------------------|---------|
| <i>k</i> /cm <sup>3</sup> molecule <sup>-1</sup> s <sup>-1</sup> | 1.1 × 10 <sup>-15</sup>             | 298     |
| <i>k</i> /cm <sup>3</sup> molecule <sup>-1</sup> s <sup>-1</sup> | 3.0 × 10 <sup>-15</sup> exp(-300/T) | 220-370 |
| <i>Reliability</i>                                               |                                     |         |
| Δ log <i>k</i>                                                   | ± 0.08                              | 298     |
| Δ E/R                                                            | ± 200                               | 220-370 |

### Comments on Preferred Values

The preferred value of  $E/R$  is based on the approximate, sole determination of Huie and Herron (1975). The preferred value of  $k$  at 298 K is based on the average of the direct determinations of Huie and Herron (1975) and Witter et al. (2002), and the relative rate determination of Greene and Atkinson (1992), corrected to 298 K, where necessary, using the preferred value of  $E/R$ . These values are in good agreement, lying within  $\pm 15\%$  of the preferred value. Japar et al. (1974) report a comparable value of  $k$ , lying about 35 % higher than the preferred value.

It is well established that the reaction proceeds by initial addition of  $O_3$  to form an energy-rich “primary ozonide (POZ)” which rapidly decomposes to form an (excited) Criegee intermediate (CI),  $[(CH_3)_2COO]^*$ , and acetone,  $CH_3C(O)CH_3$ , as represented in the schematic shown below. The schematic also shows some established features of the further chemistry of  $[(CH_3)_2COO]^*$ , with suggested approximate contributions of the product pathways at 298 K and atmospheric pressure inferred from reported end product studies.

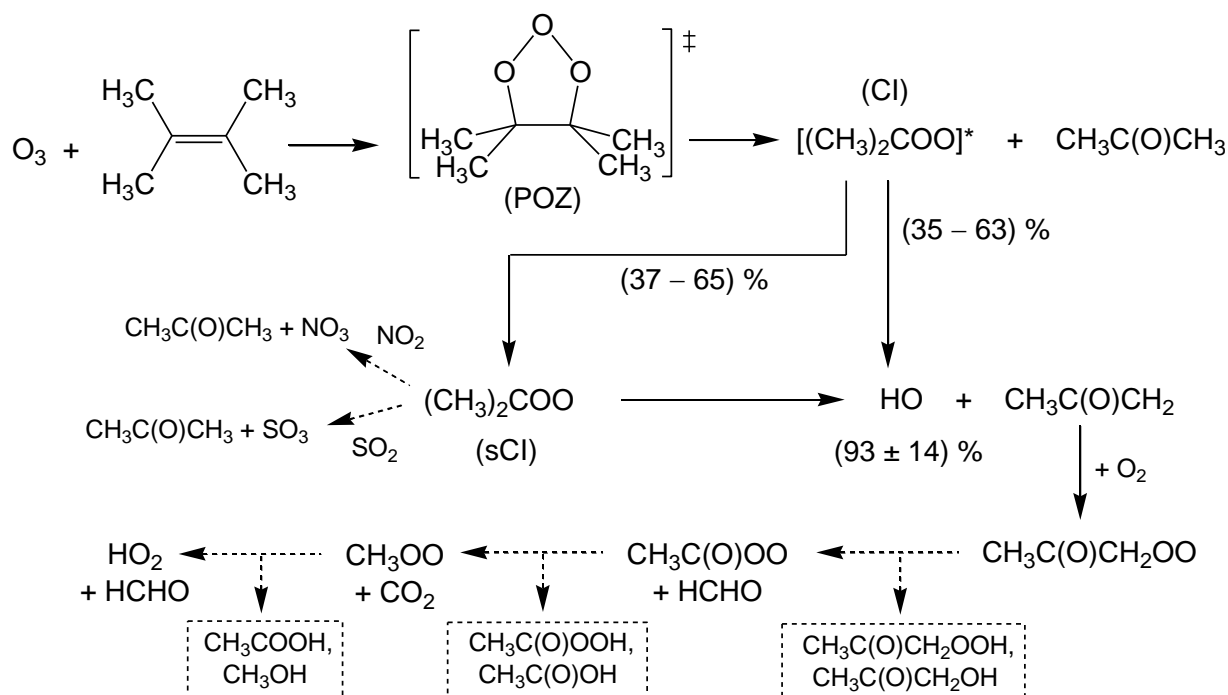

$[(CH_3)_2COO]^*$  may either decompose, or be collisionally deactivated to form the stabilized Criegee intermediate  $(CH_3)_2COO$  (sCI). The yield of sCI has been determined in a number of studies, based on scavenging with added  $SO_2$ , and quantification of the product  $H_2SO_4$ . The yield has been shown to be dependent on pressure (Drodz et al., 2011; Hakala and Donahue, 2016; Campos-Pineda and Zhang, 2017), suggesting a small nascent yield of sCI, 12–15 %, at zero pressure. There is some disagreement in the yields measured at higher pressures, although more recent studies (Berndt et al., 2014; Newland et al., 2015, 2020; Hakala and Donahue, 2016) report relatively consistent values in the range 31–45 % at atmospheric pressure (preferred value  $38 \pm 10\%$ ).

The dominant decomposition route for both the excited and stabilized Criegee intermediates is expected to form HO radicals by an accepted decomposition mechanism involving abstraction of a  $\beta$ -hydrogen via a vinyl hydroperoxide intermediate (Fenske et al., 2000; Kroll et al., 2001), also forming the methylvinoyl or acetyl radical ( $CH_3C(O)CH_2$ ) as a co-product. Direct and indirect evidence for the formation of HO radicals has been reported in numerous studies (e.g. Chew and Atkinson, 1996; Rickard et al., 1999; Fenske et al., 2000; Siese et al., 2001; Orzechowska and Paulson, 2002; Aschmann et al., 2003; Berndt and Böge, 2006; Alam et al., 2013), with yields in the range 80–107 % at close to atmospheric pressure (preferred value,  $93 \pm 14\%$ ). This suggests that decomposition is almost the

exclusive fate for  $(\text{CH}_3)_2\text{COO}$  under typical experimental conditions, with only a minor fraction removed by bimolecular reaction. Consistent with this, reported yields of acetone ( $\text{CH}_3\text{C}(\text{O})\text{CH}_3$ ) in experiments employing an HO radical scavenger are close to unity (e.g. Grosjean and Grosjean, 1996; Tuazon et al., 1997; Wedian and Atkinson, 2010; Newland et al., 2020) indicating that its secondary formation from bimolecular reactions of  $(\text{CH}_3)_2\text{COO}$  is limited. Based on reported kinetic data (summarised and evaluated in datasheets CGI\_14 and CGI\_18 to CGI\_20), decomposition is also the major fate of  $(\text{CH}_3)_2\text{COO}$  under tropospheric conditions.

The acetonyl radical ( $\text{CH}_3\text{C}(\text{O})\text{CH}_2$ ) reacts with  $\text{O}_2$  under atmospheric conditions. This is expected to form a stabilized peroxy radical, which can undergo conventional bimolecular reactions (e.g. with NO,  $\text{HO}_2$  and other peroxy radicals) initiating reaction sequences forming a large number of potential products, with examples shown in the schematic. These include formaldehyde ( $\text{HCHO}$ ), methyl glyoxal ( $\text{CH}_3\text{C}(\text{O})\text{CHO}$ ), hydroxyacetone ( $\text{CH}_3\text{C}(\text{O})\text{CH}_2\text{OH}$ ), methanol ( $\text{CH}_3\text{OH}$ ) and  $\text{CO}_2$ , which have been reported to be formed in experimental studies employing HO scavengers (e.g. Grosjean and Grosjean, 1996; Tuazon et al., 1997; Wedian and Atkinson, 2010). The approximate reported yields are 29-43 % for  $\text{HCHO}$ , 30 % for methyl glyoxal and hydroxyacetone collectively, 6 % for  $\text{CH}_3\text{OH}$  and 28 % for  $\text{CO}_2$ .

## References

- Alam, M. S., Rickard, A. R., Camredon, M., Wyche, K. P., Carr, T., Hornsby, K. E., Monks, P. S. and Bloss, W. J.: *J. Phys. Chem.*, 117, 12468, 2013.
- Aschmann, S. M., Tuazon, E. C., Arey, J. and Atkinson, R.: *J. Phys. Chem. A*, 107, 2247, 2003.
- Berndt, T. and Böge, O.: *Phys. Chem. Chem. Phys.*, 8, 1205, 2006.
- Berndt, T., Jokinen, T., Sipilä, M., Mauldin, R. L., Herrmann, H., Stratmann, F., Junninen, H. and Kulmala, M.: *Atmos. Environ.*, 89, 603, 2014.
- Campos-Pineda, M. and Zhang, J.: *Chem. Phys. Lett.*, 683, 647, 2017.
- Chew, A. A. and Atkinson, R.: *J. Geophys. Res.*, 101, 28649, 1996.
- Drozd, G. T., Kroll, J. and Donahue, N. M.: *J. Phys. Chem. A*, 115, 161, 2011.
- Fenske, J. D., Hasson, A. S., Paulson, S. E., Kuwata, K. T., Ho, A. and Houk, K. N.: *J. Phys. Chem. A*, 104, 7821, 2000.
- Greene, C. R. and Atkinson, R.: *Int. J. Chem. Kinet.*, 24, 803, 1992.
- Grosjean, E. and Grosjean, D.: *Environ. Sci. Technol.* 30, 2036, 1996.
- Hakala, J. P. and Donahue, N. M.: *J. Phys. Chem. A*, 120, 2173, 2016.
- Huie, R. E. and Herron, J. T.: *Int. J. Chem. Kinet., Symp.* 1, 165, 1975.
- Japar, S. M., Wu, C. H. and Niki, H.: *J. Phys. Chem.*, 78, 2318, 1974.
- Kroll, J. H., Sahay, S. R., Anderson, J. G., Demerjian, K. L. and Donahue, N. M.: *J. Phys. Chem. A*, 105, 4446, 2001.
- Newland, M. J., Rickard, A. R., Alam, M. S., Vereecken, L., Muñoz, A., Ródenas, M. and Bloss, W. J.: *Phys. Chem. Chem. Phys.*, 17, 4076, 2015.
- Newland, M. J., Nelson, B. S., Muñoz, A., Ródenas, M., Vera, T., Tárrega, J., and Rickard, A. R.: *Phys. Chem. Chem. Phys.*, 22, 13698, 2020.
- Orzechowska, G. and Paulson, S. E.: *Atmos. Environ.*, 36, 571, 2002.
- Rickard, A. R., Johnson, D., McGill, C. D. and Marston, G.: *J. Phys. Chem. A*, 103, 7656, 1999.
- Siese, M., Becker, K. H., Brockmann, K. J., Geiger, H., Hofzumahaus, A., Holland, F., Mihelcic, D. and Wirtz, K.: *Environ. Sci. Technol.*, 35, 4660, 2001.
- Tuazon, E. C., Aschmann, S. M., Arey, J. and Atkinson, R.: *Environ. Sci. Technol.*, 31, 3004, 1997.
- Wedian, F. Z. and Atkinson, D. B.: *J. Atmos. Chem.*, 66, 65, 2010.
- Witter, M., Berndt, T., Böge, O., Stratmann, F. and Heintzenberg, J.: *Int. J. Chem. Kinet.*, 34, 394, 2002.



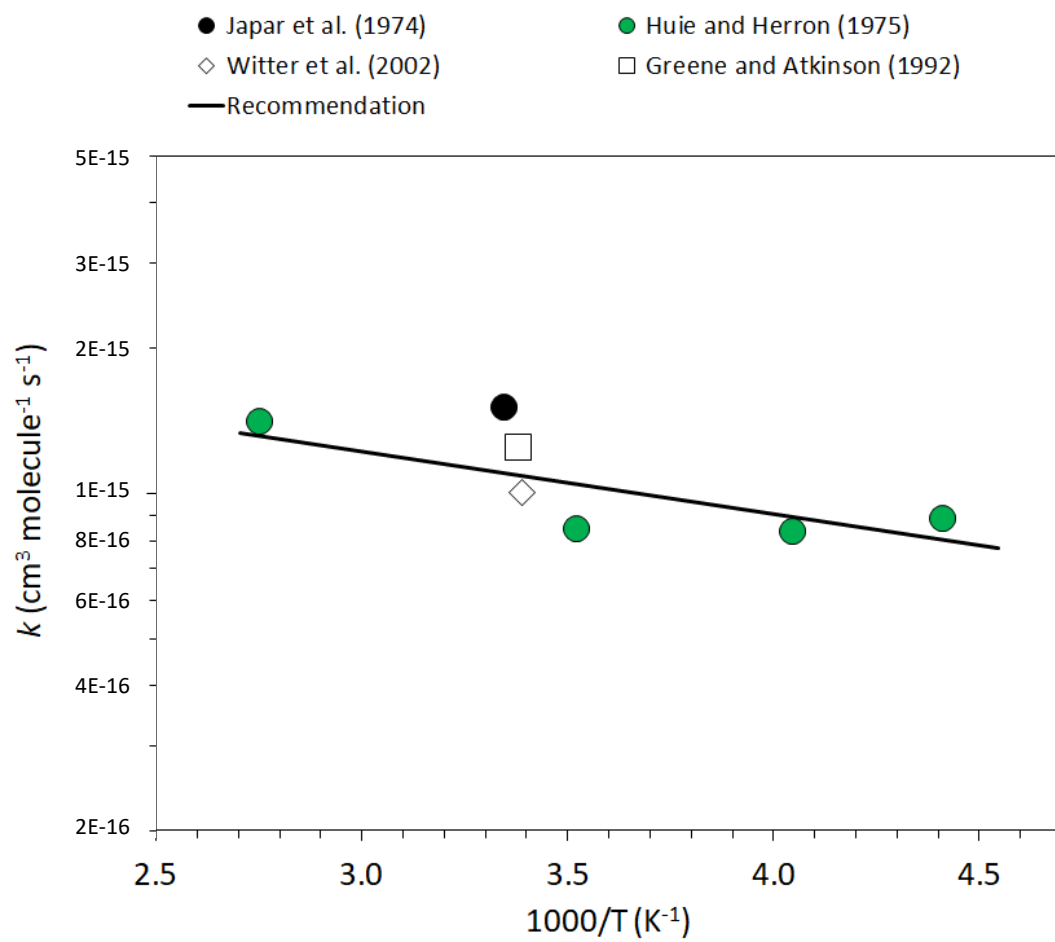

**Ox\_VOC7: isoprene**

Last evaluated: March 2020; Last change in preferred values: July 2018

**O<sub>3</sub> + CH<sub>2</sub>=C(CH<sub>3</sub>)CH=CH<sub>2</sub> (isoprene) → products****Rate coefficient data**

| <i>k</i> /cm <sup>3</sup> molecule <sup>-1</sup> s <sup>-1</sup> | Temp./K | Reference                       | Technique/<br>Comments |
|------------------------------------------------------------------|---------|---------------------------------|------------------------|
| <i>Absolute Rate Coefficients</i>                                |         |                                 |                        |
| 1.27 × 10 <sup>-17</sup>                                         | 295 ± 1 | Arnts and Gay, 1979             | S-CL/GC (a)            |
| 7.0 × 10 <sup>-18</sup>                                          | 260 ± 2 | Adeniji et al., 1981            | S-CL/GC-FID (a)        |
| 1.65 × 10 <sup>-17</sup>                                         | 294 ± 2 |                                 |                        |
| 1.54 × 10 <sup>-14</sup> exp[-(2153 ± 430)/T]                    | 278-323 | Atkinson et al., 1982           | S-CL/GC-FID (a)        |
| (1.17 ± 0.19) × 10 <sup>-17</sup>                                | 296 ± 2 |                                 |                        |
| 7.8 × 10 <sup>-15</sup> exp[-(1913 ± 139)/T]                     | 242-323 | Treacy et al., 1992             | S-CL (a)               |
| (1.28 ± 0.12) × 10 <sup>-17</sup>                                | 298     |                                 |                        |
| (8.95 ± 0.25) × 10 <sup>-18</sup>                                | 293 ± 2 | Grosjean et al., 1993           | S-UVA/FTIR (a)         |
| (1.13 ± 0.32) × 10 <sup>-17</sup>                                | 291 ± 2 | Grosjean and Grosjean, 1996     | S-UVA/FTIR (a)         |
| 1.30 × 10 <sup>-17</sup>                                         | 296 ± 2 | Neeb et al., 1999               | S-FTIR (b)             |
| (1.19 ± 0.09) × 10 <sup>-17</sup>                                | 293 ± 2 | Klawatsch-Carrasco et al., 2004 | S-FTIR (c)             |
| (9.6 ± 0.7) × 10 <sup>-18</sup>                                  | 286     | Karl et al., 2004               | S-UVA/GC-FID (d)       |
| (1.24 ± 0.03) × 10 <sup>-17</sup>                                | 298 ± 1 | Sato et al., 2013               | S-FTIR (e)             |
| (1.13 ± 0.17) × 10 <sup>-17</sup>                                | 294 ± 2 | Ren et al., 2017                | S-UVA/FTIR (f)         |
| (9.3 ± 0.7) × 10 <sup>-18</sup>                                  | 285 ± 2 |                                 |                        |
| (8.6 ± 0.5) × 10 <sup>-18</sup>                                  | 285 ± 2 | Ren et al., 2017                | S-UVA/FTIR (a)         |
| <i>Relative Rate Coefficients</i>                                |         |                                 |                        |
| (1.22 ± 0.02) × 10 <sup>-17</sup>                                | 296 ± 2 | Greene and Atkinson, 1992       | RR/GC-FID (g)          |
| 9.96 × 10 <sup>-15</sup> exp[-(1973 ± 42)/T]                     | 257-324 | Khamaganov and Hites, 2001      | RR-MS (h,i)            |
| (1.31 ± 0.08) × 10 <sup>-17</sup>                                | 298     |                                 |                        |
| 1.69 × 10 <sup>-14</sup> exp[-(2080 ± 120)/T]                    | 242-324 | Khamaganov and Hites, 2001      | RR-MS (h,j)            |
| (1.56 ± 0.13) × 10 <sup>-17</sup>                                | 298     |                                 |                        |
| 1.31 × 10 <sup>-14</sup> exp[-(2056 ± 87)/T]                     | 242-324 | Khamaganov and Hites, 2001      | RR-MS (h,k)            |
| (1.31 ± 0.07) × 10 <sup>-17</sup>                                | 298     |                                 |                        |
| 9.45 × 10 <sup>-15</sup> exp[-(1963 ± 72)/T]                     | 258-324 | Khamaganov and Hites, 2001      | RR-MS (h,l)            |
| (1.31 ± 0.08) × 10 <sup>-17</sup>                                | 298     |                                 |                        |
| 1.43 × 10 <sup>-14</sup> exp[-(2015 ± 149)/T]                    | 278-353 | Avzianova and Ariya, 2002       | RR/GC-FID (m)          |
| (1.23 ± 0.03) × 10 <sup>-17</sup>                                | 298     |                                 |                        |

**Comments**

- (a) *k* determined from the observed first-order rate of ozone decay (measured by the first technique shown) in the presence of known excess concentrations of isoprene (measured either by the second technique shown, or with the initial concentration determined by quantified dilution of the pure gas).
- (b) *k* determined from the observed first-order rate of isoprene decay in the presence of known excess concentrations of ozone, with both reagents measured by FTIR. Cyclohexane added to scavenge HO radicals.
- (c) Both reagents measured by FTIR. Experiments carried out with isoprene in slight excess, in the presence of excess CO as an HO radical scavenger. A value of *k* was retrieved for each time point during reagent decay in two experiments, based on the observed loss of ozone and the measured

concentration of isoprene. The quoted value of  $k$  was based on the average of 27 time point determinations.

- (d)  $k$  determined from the observed rate of isoprene decay (measured by GC-FID) in the presence of known excess, but changing, concentrations of ozone (measured by UVA), using numerical integration. CO added to scavenge HO radicals.
- (e)  $k$  determined from the observed rate of isoprene decay in the presence of known excess, but changing, concentrations of ozone, using numerical integration. Both reagents were measured by FTIR. Experiments were carried out using four HO scavengers (cyclohexane, CO, hexane and diethyl ether), leading to respective values of  $k$  (in units  $10^{-17} \text{ cm}^3 \text{ molecule}^{-1} \text{ s}^{-1}$ ) of  $1.22 \pm 0.07$ ,  $1.24 \pm 0.07$ ,  $1.28 \pm 0.03$  and  $1.23 \pm 0.09$ . The tabulated value is the average of these determinations. A higher value of  $(1.47 \pm 0.04) \times 10^{-17} \text{ cm}^3 \text{ molecule}^{-1} \text{ s}^{-1}$  was obtained in the absence of an HO scavenger.
- (f)  $k$  determined from the observed first-order rate of isoprene decay (measured by FTIR) in the presence of known excess concentrations of ozone (measured by UVA). Cyclohexane added to scavenge HO radicals. Rate coefficients approximately 15 % higher value were obtained in the absence of an HO scavenger.
- (g) Relative rate study, with *n*-octane present to scavenge HO radicals. The concentrations of isoprene and propene (the reference compound) were measured by GC. The measured value of  $k(\text{O}_3 + \text{isoprene})/k(\text{O}_3 + \text{propene}) = 1.21 \pm 0.02$  is placed on an absolute basis using  $k(\text{O}_3 + \text{propene}) = 1.01 \times 10^{-17} \text{ cm}^3 \text{ molecule}^{-1} \text{ s}^{-1}$  at 296 K (IUPAC, current recommendation).
- (h) Relative rate method carried out at 760 Torr (1.013 bar) of helium diluent in a 192  $\text{cm}^3$  volume cylindrical quartz reactor, with ethanol or acetaldehyde being present to scavenge the HO radicals formed. The concentrations of isoprene and the reference compound were monitored by MS.
- (i) With 2-methylpropene as the reference compound. The measured rate coefficient ratios  $k(\text{O}_3 + \text{isoprene})/k(\text{O}_3 + 2\text{-methylpropene})$  are placed on an absolute basis using a rate coefficient of  $k(\text{O}_3 + 2\text{-methylpropene}) = 2.92 \times 10^{-15} \exp(-1650/T) \text{ cm}^3 \text{ molecule}^{-1} \text{ s}^{-1}$  (IUPAC current recommendation). Note that in Table 3 of Khamaganov and Hites (2001), the rate coefficient ratios stated to be relative to 2-methylpropene appear (Table 7 and Figure 4) to be relative to but-1-ene, and *vice versa*.
- (j) With *cis*-but-2-ene as the reference compound. The measured rate coefficient ratios  $k(\text{O}_3 + \text{isoprene})/k(\text{O}_3 + \text{cis-but-2-ene})$  are placed on an absolute basis using  $k(\text{O}_3 + \text{cis-2-butene}) = 3.37 \times 10^{-15} \exp(-970/T) \text{ cm}^3 \text{ molecule}^{-1} \text{ s}^{-1}$  (IUPAC current recommendation).
- (k) With 1-butene as the reference compound. The measured rate coefficient ratios [see Comment (e)]  $k(\text{O}_3 + \text{isoprene})/k(\text{O}_3 + \text{but-1-ene})$  are placed on an absolute basis using  $k(\text{O}_3 + 1\text{-butene}) = 3.55 \times 10^{-15} \exp(-1750/T) \text{ cm}^3 \text{ molecule}^{-1} \text{ s}^{-1}$  (IUPAC current recommendation).
- (l) With 2,3-dimethyl-1,3-butadiene as the reference compound. The measured rate coefficient ratios  $k(\text{O}_3 + \text{isoprene})/k(\text{O}_3 + 2,3\text{-dimethyl-but-1,3-diene})$  are placed on an absolute basis using  $k(\text{O}_3 + 2,3\text{-dimethyl-1,3-butadiene}) = 6.9 \times 10^{-15} \exp(-1668/T) \text{ cm}^3 \text{ molecule}^{-1} \text{ s}^{-1}$  (Atkinson and Arey, 2003).
- (m) Relative rate study, with 1,3,5-trimethylbenzene present to scavenge HO radicals. The concentrations of isoprene and propene (the reference compound) were measured by GC. The measured rate coefficient ratios were not tabulated, except at room temperature, assumed to be 298 K. The expression  $k(\text{O}_3 + \text{isoprene})/k(\text{O}_3 + \text{propene}) = 2.47 \exp[(135 \pm 149)/T]$ , derived from the data, is placed on an absolute basis using  $k(\text{O}_3 + \text{propene}) = 5.77 \times 10^{-15} \exp(-1880/T) \text{ cm}^3 \text{ molecule}^{-1} \text{ s}^{-1}$  (IUPAC, current recommendation). Note that the 298 K rate coefficient calculated from the reported Arrhenius expression is about 30 % higher than the measured value (see table).

## Preferred Values

| Parameter                                              | Value                                | T/K     |
|--------------------------------------------------------|--------------------------------------|---------|
| $k / \text{cm}^3 \text{ molecule}^{-1} \text{ s}^{-1}$ | $1.28 \times 10^{-17}$               | 298     |
| $k / \text{cm}^3 \text{ molecule}^{-1} \text{ s}^{-1}$ | $1.05 \times 10^{-14} \exp(-2000/T)$ | 240-360 |
| <i>Reliability</i>                                     |                                      |         |
| $\Delta \log k$                                        | $\pm 0.08$                           | 298     |
| $\Delta E/R$                                           | $\pm 200$                            | 240-360 |

### Comments on Preferred Values

The kinetics determinations are in generally good agreement, with consistent values of the temperature coefficient ( $E/R$ ) reported in a number of studies. The preferred value of  $E/R$  is the average of those reported by Treacy et al. (1992), Khamaganov and Hites (2001) and Avzianova and Ariya (2002). The preferred value of  $k$  at 298 K is an average of the room temperature determinations reported by Atkinson et al. (1982), Treacy et al. (1992), Greene and Atkinson (1992), Grosjean and Grosjean (1996), Neeb and Moortgat (1999), Khamaganov and Hites (2001), Avzianova and Ariya (2002), Karl et al. (2004), Sato et al. (2013) and Ren et al. (2017), corrected to 298 K, where necessary, using the preferred value of  $E/R$ .

It is well established that the reaction proceeds by initial addition of  $\text{O}_3$  to either of the  $\text{C}=\text{C}$  bonds in the conjugated diene system, forming a pair of energy-rich primary ozonides (POZ-1 and POZ-2) as shown in the schematic below.

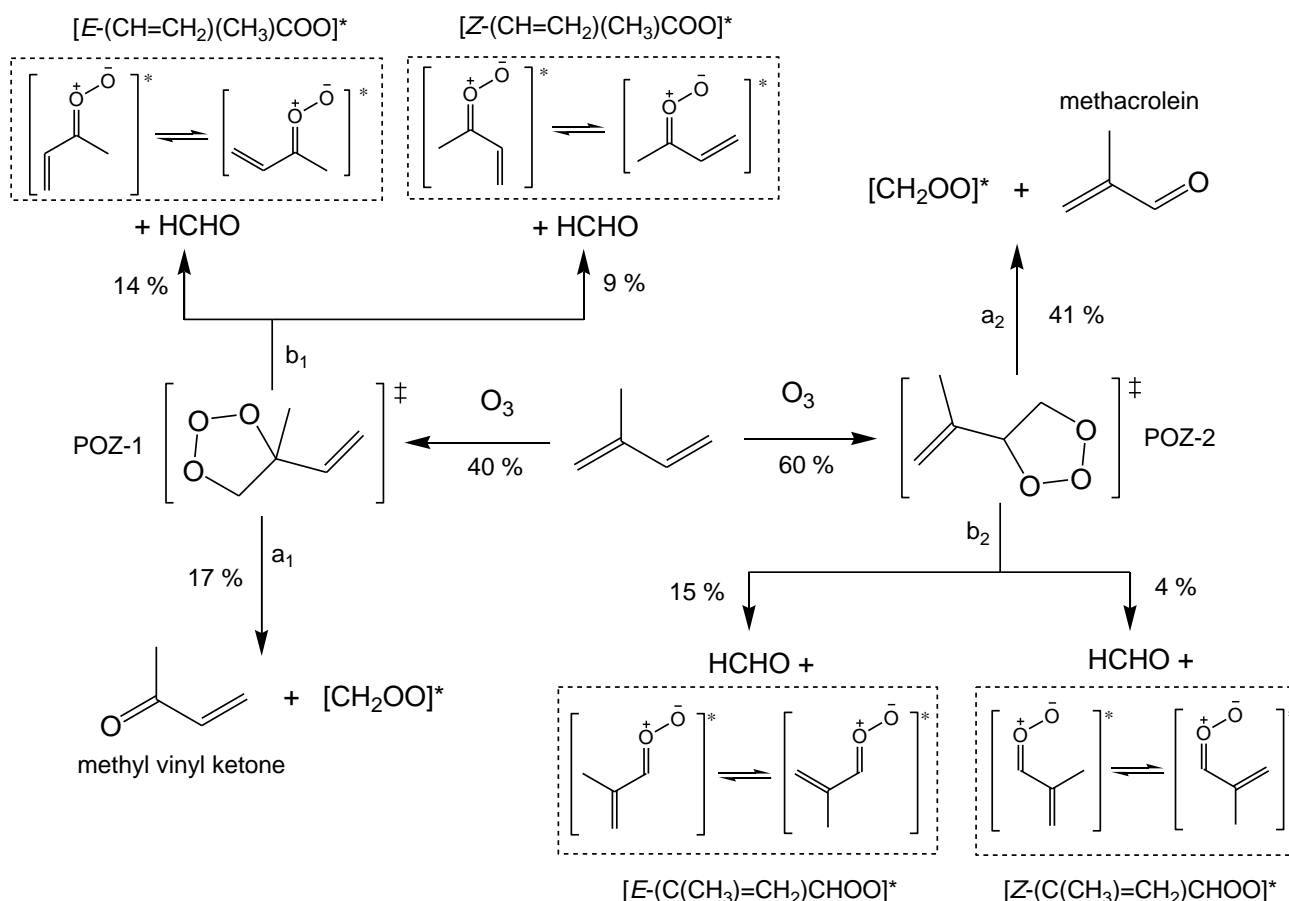

POZ-1 rapidly decomposes to form either methyl vinyl ketone and the (excited) Criegee intermediate,  $[\text{CH}_2\text{OO}]^*$  (route  $a_1$ ); or formaldehyde (HCHO) in conjunction with either  $[E-(\text{CH}=\text{CH}_2)(\text{CH}_3)\text{COO}]^*$  or  $[Z-(\text{CH}=\text{CH}_2)(\text{CH}_3)\text{COO}]^*$  (route  $b_1$ ). Similarly, POZ-2 decomposes to form either methacrolein and  $[\text{CH}_2\text{OO}]^*$  (route  $a_2$ ); or HCHO in conjunction with either  $[E-(\text{C}(\text{CH}_3)=\text{CH}_2)\text{CHOO}]^*$  or  $[Z-(\text{C}(\text{CH}_3)=\text{CH}_2)\text{CHOO}]^*$  (route  $b_2$ ). Reported molar yields of the  $\text{C}_4$  carbonyls, methacrolein (0.32 – 0.44) and methyl vinyl ketone (0.13 – 0.18) are consistent with their formation mainly as primary products (e.g. Aschmann and Atkinson, 1994; Grosjean et al., 1993; Rickard et al., 1999; Nguyen et al., 2016). These yields suggest significant contributions from initial addition of  $\text{O}_3$  to each  $\text{C}=\text{C}$  bond in isoprene, and from decomposition routes  $a_1$  for POZ-1 and  $a_2$  for POZ-2. Reported molar yields of HCHO (0.79 – 0.90; Grosjean et al., 1993; Nguyen et al., 2016) are consistent with the operation of decomposition routes  $b_1$  and  $b_2$ , with HCHO formed directly and from the subsequent chemistry of both sets of  $\text{C}_4$  Criegee intermediate and  $[\text{CH}_2\text{OO}]^*$ . The contributions assigned to the channels in the schematic are taken from Nguyen et al. (2016), and are a combination of their results and information from the literature.

The excited Criegee intermediates may either decompose/isomerize, or be collisionally deactivated to form the corresponding stabilized Criegee intermediates (sCI). A number of relatively recent studies report total sCI yields that are in good agreement, based on scavenging with added  $\text{SO}_2$  or  $\text{H}_2\text{O}$  and quantification of the associated products or reagent removal (Sipilä et al., 2014; Newland et al., 2015; Nguyen et al., 2016). We recommend a yield of  $0.65 \pm 0.10$ , based on consideration of these results (see data sheet CGI\_21). The information suggests that  $\text{CH}_2\text{OO}$  makes a major contribution to the total, as a result of near-quantitative stabilization of  $[\text{CH}_2\text{OO}]^*$ . The contribution of the  $\text{C}_4$  sCI isomers is therefore believed to be comparatively limited (particularly under atmospheric conditions), partly because they are not stabilized to the same extent as  $\text{CH}_2\text{OO}$ , but also because very rapid unimolecular reactions are estimated to be available for stabilized  $Z-(\text{CH}=\text{CH}_2)(\text{CH}_3)\text{COO}$  and  $Z-(\text{C}(\text{CH}_3)=\text{CH}_2)\text{CHOO}$  (Vereecken et al., 2017), with decomposition likely also the major fate for  $E-(\text{CH}=\text{CH}_2)(\text{CH}_3)\text{COO}$ . Based on reported kinetic data (summarised and evaluated in datasheets CGI\_1 to CGI\_12), the major fate of  $\text{CH}_2\text{OO}$  under tropospheric conditions is expected to be removal via bimolecular reactions, e.g. with  $(\text{H}_2\text{O})_2$ ,  $\text{NO}_2$  and  $\text{SO}_2$ .

Direct and indirect evidence for the formation of HO radicals has been reported in numerous studies (e.g. Aschmann et al., 1996; Paulson et al., 1998; Neeb and Moortgat, 1999; Malkin et al., 2010; Nguyen et al., 2016; Ren et al., 2017), with yields in the range 0.24-0.28 (preferred value,  $0.26 \pm 0.04$ ). An important contribution to HO formation is expected to result from (excited or stabilized)  $E-(\text{CH}=\text{CH}_2)(\text{CH}_3)\text{COO}$ , by an accepted decomposition mechanism involving migration of a  $\beta$ -hydrogen from the  $-\text{CH}_3$  group via a vinyl hydroperoxide intermediate (Fenske et al., 2000; Kroll et al., 2001; Barber et al., 2018), also forming the  $\text{CH}_2=\text{CHC}(=\text{O})\text{CH}_2$  radical as a co-product. However, additional indirect HO formation may result from the further chemistry of  $\text{CH}_2=\text{CHC}(=\text{O})\text{CH}_2$ , and following decomposition of the other  $\text{C}_4$  Criegee intermediates, as described in the detailed mechanisms presented by Nguyen et al. (2016). These mechanisms also include significant secondary sources of HCHO, and can account for the reported formation of a number of  $\text{C}_1$ - $\text{C}_3$  products (e.g. pyruvic acid and methyl glyoxal) in low yields (Grosjean et al., 1993).

## References

- Adeniji, S. A., Kerr, J. A. and Williams, M. R.: Int. J. Chem. Kinet., 13, 209, 1981.
- Arnts, R. R. and Gay Jr., B. W.: Photochemistry of Some Naturally Emitted Hydrocarbons, U.S. Environmental Protection Agency Report No. EPA-600/3-79-081, Environmental Sciences Research Laboratory, Office of Research and Development, Research Triangle Park, NC, September 1979.
- Aschmann, S. M. and Atkinson, R.: Environ. Sci. Technol., 28, 1539, 1994.
- Aschmann, S. M., Arey, J., and Atkinson, R.: Atmos. Environ., 30, 2939-2943, 1996.

- Atkinson, R., Winer, A. M. and Pitts Jr., J. N.: *Atmos. Environ.*, 16, 1017, 1982.
- Avzianova, E. V. and Ariya, P. A.: *Int. J. Chem. Kinet.*, 34, 678, 2002.
- Barber, V. P., Pandit, S., Green, A. M., Trongsiwat, N., Walsh, P. J., Klippenstein, S. R. and Lester, M. I.: *J. Am. Chem. Soc.*, 140, 10866, 2018.
- Fenske, J. D., Hasson, A. S., Paulson, S. E., Kuwata, K. T., Ho, A. and Houk, K. N.: *J. Phys. Chem. A*, 104, 7821, 2000b.
- Greene, C. R. and Atkinson, R.: *Int. J. Chem. Kinet.*, 24, 803, 1992.
- Grosjean, D., Williams II, E. L. and Grosjean, E.: *Environ. Sci. Technol.*, 27, 830, 1993.
- Grosjean, E. and Grosjean, D.: *Int. J. Chem. Kinet.*, 28, 911, 1996.
- Karl, M., Brauers, Th., Dorn, H.-P., Holland, F., Komenda, M., Poppe, D., Rohrer, F., Rupp, L., Schaub, A. and Wahner, A.: *Geophys. Res. Lett.*, 31, L05117, doi: 10.1029/2003GL019189, 2004.
- Khamaganov, V. G. and Hites, R. A.: *J. Phys. Chem. A*, 105, 815, 2001.
- Klawatsch-Carrasco, N., Doussin, J. F. and Carlier, P.: *Int. J. Chem. Kinet.*, 36, 152, 2004.
- Kroll, J. H., Sahay, S. R., Anderson, J. G., Demerjian, K. L. and Donahue, N. M.: *J. Phys. Chem. A*, 105, 4446, 2001.
- Malkin, T. L., Goddard, A., Heard, D. E. and Seakins, P. W.: *Atmos. Chem. Phys.*, 10, 1441-1459, 2010.
- Neeb, P. and Moortgat, G. K.: *J. Phys. Chem. A*, 103, 9003, 1999.
- Newland, M. J., Rickard, A. R., Vereecken, L., Muñoz, A., Ródenas, M., and Bloss, W. J.: *Atmos. Chem. Phys.*, 15, 9521-9536, <https://doi.org/10.5194/acp-15-9521-2015>, 2015.
- Nguyen, T. B., Tyndall, G. S., Crounse, J. D., Teng, A. P., Bates, K. H., Schwantes, R. H., Coggon, M. M., Zhang, L., Feiner, P., Müller, D. O., Skog, K. M., Rivera-Rios, J. C., Dorris, M., Olson, K. F., Koss, A., Wild, R. J., Brown, S. S., Goldstein, A. H., de Gouw, J. A., Brune, W. H., Keutsch, F. N., Seinfeld, J. H. and Wennberg, P. O.: *Phys. Chem. Chem. Phys.*, 18, 10241, 2016.
- Paulson, S. E., Chung, M., Sen, A. D. and Orzechowska, G.: *J. Geophys. Res.-Atmos.*, 103, 25533-25539, 1998.
- Ren, Y., Grosselin, B., Daële, V. and Mellouki, A.: *Faraday Discuss.*, 200, 289, 2017.
- Rickard, A. R., Johnson, D., McGill, C. D. and Marston, G.: *J. Phys. Chem. A*, 103, 7656, 1999.
- Sato, K., Inomata, S., Xing, J.-H., Imamura, T., Uchida, R., Fukuda, S., Nakagawa, K., Hirokawa, J., Okumura, M. and Tohno, S.: *Atmos. Environ.*, 79, 147, 2013.
- Sipilä, M., Jokinen, T., Berndt, T., Richters, S., Makkonen, R., Donahue, N. M., Mauldin III, R. L., Kurtén, T., Paasonen, P., Sarnela, N., Ehn, M., Junninen, H., Rissanen, M. P., Thornton, J., Stratmann, F., Herrmann, H., Worsnop, D. R., Kulmala, M., Kerminen, V.-M., and Petäjä, T.: *Atmos. Chem. Phys.*, 14, 12143, <https://doi.org/10.5194/acp-14-12143-2014>, 2014.
- Treacy, J., El Haag, M., O'Farrell, D. and Sidebottom, H.: *Ber. Bunsenges. Phys. Chem.*, 96, 422, 1992.
- Vereecken, L., Novelli, A. and Taraborrelli, D.: *Phys. Chem. Chem. Phys.*, 19, 31599, 2017.

- △ Arnts and Gay (1979)
- ▲ Atkinson et al. (1982)
- Grosjean et al. (1993)
- ◇ Neeb and Moortgat (1999)
- Karl et al. (2004)
- Ren et al. (2017) isoprene excess
- Greene and Atkinson (1992)
- △ Khamanagov and Hites (2001) relative to cis-but-2-ene
- + Khamanagov and Hites (2001) relative to 2,3-dimethyl-buta-1,3-diene
- - - Avzianova and Ariya (2002) Arrhenius expression
- Adeniji et al. (1981)
- Treacy et al. (1992)
- ▲ Grosjean and Grosjean (1996)
- Klawatsch-Carrasco et al. (2004)
- ◇ Sato et al. (2013)
- Ren et al. (2017) ozone excess
- Khamanagov and Hites (2001) relative to 2-methylpropene
- ◇ Khamanagov and Hites (2001) relative to but-1-ene
- Avzianova and Ariya (2002)
- Recommendation

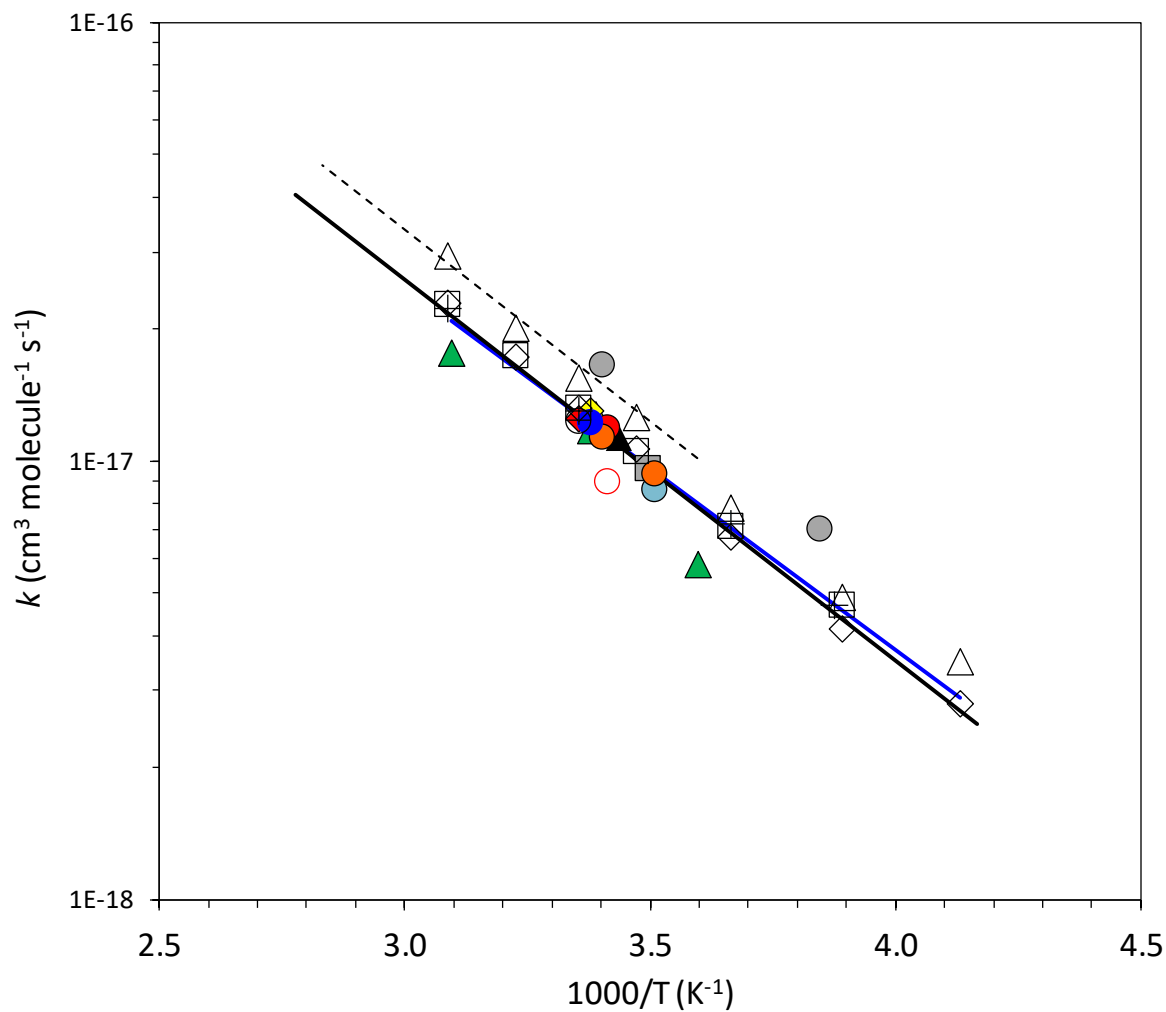

## A2. Data sheets for reactions of O<sub>3</sub> with monoterpenes

### Ox\_VOC8: $\alpha$ -pinene

Last evaluated: August 2020; Last change in preferred values: August 2018

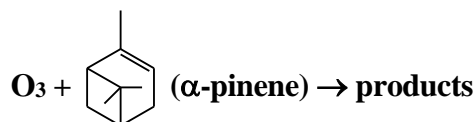

#### Rate coefficient data

| $k/\text{cm}^3 \text{ molecule}^{-1} \text{ s}^{-1}$ | Temp./K       | Reference                  | Technique/<br>Comments |
|------------------------------------------------------|---------------|----------------------------|------------------------|
| <i>Absolute Rate Coefficients</i>                    |               |                            |                        |
| $1.6 \times 10^{-16}$                                | 294           | Ripperton et al., 1972     | S-CL                   |
| $(3.3 \pm 0.3) \times 10^{-16}$                      | 298           | Japar et al., 1974         | S-CL                   |
| $1.45 \times 10^{-16}$                               | $295 \pm 1$   | Grimsrud et al., 1975      | F-CL                   |
| $9.4 \times 10^{-16} \exp[-(731 \pm 173)/T]$         | 276-324       | Atkinson et al., 1982      | S-CL/GC (a)            |
| $(8.4 \pm 1.9) \times 10^{-17}$                      | $296 \pm 2$   |                            |                        |
| $(9.71 \pm 1.06) \times 10^{-17}$                    | $296 \pm 2$   | Atkinson et al., 1990      | S-CL/GC (b)            |
| $1.4 \times 10^{-15} \exp[-(833 \pm 86)/T]$          | 243.1-303.2   | Tillmann et al., 2009      | S-UVA/MS (c)           |
| $(9.0 \pm 0.6) \times 10^{-17}$                      | 303.2         |                            |                        |
| $(1.1 \pm 0.1) \times 10^{-16}$                      | $296 \pm 1$   | Bernard et al., 2012       | F-CL (d)               |
| <i>Relative Rate Coefficients</i>                    |               |                            |                        |
| $(8.54 \pm 1.29) \times 10^{-17}$                    | $297 \pm 2$   | Nolting et al., 1988       | RR-GC (e)              |
| $6.0 \times 10^{-16} \exp[-(560 \pm 87)/T]$          | 288-363       | Khamaganov and Hites, 2001 | RR-MS (f,g)            |
| $(9.39 \pm 0.46) \times 10^{-17}$                    | 298           |                            |                        |
| $3.8 \times 10^{-16} \exp[-(447 \pm 303)/T]$         | 288-343       | Khamaganov and Hites, 2001 | RR-MS (f,h)            |
| $(8.26 \pm 0.34) \times 10^{-17}$                    | 298           |                            |                        |
| $(1.06 \pm 0.09) \times 10^{-16}$                    | $295 \pm 0.5$ | Witter et al., 2002        | RR-GC (i)              |
| $(9.26 \pm 0.84) \times 10^{-17}$                    | $302 \pm 1$   | Bernard et al., 2012       | RR-IR (j,k)            |
| $(1.03 \pm 0.04) \times 10^{-16}$                    | $302 \pm 1$   |                            | RR-IR (j,l)            |
| $(1.13 \pm 0.14) \times 10^{-16}$                    | $298 \pm 2$   | Stewart et al., 2013       | RR-GC (m)              |

$\alpha$ -pinene is 2,6,6-trimethyl-bicyclo[3.1.1]hept-2-ene

#### Comments

- (a)  $k$  determined from the observed first-order rate of ozone decay (measured with a chemiluminescence analyzer) in the presence of known excess concentrations of  $\alpha$ -pinene (measured by GC-FID). Experiments were carried out either in a 175 L Teflon bag or in the SAPRC 5800 L Teflon-coated environmental chamber.
- (b)  $k$  determined from the observed first-order rate of ozone decay (measured with a chemiluminescence analyzer) in the presence of known excess concentrations of  $\alpha$ -pinene (measured by GC-FID). Experiments were carried out in a 160 L Teflon chamber. From measurements of the absolute rate coefficient for the reaction of O<sub>3</sub> with sabinene and the ratio  $k(\text{O}_3 + \alpha\text{-pinene})/k(\text{O}_3 + \text{sabinene})$ , a rate coefficient of  $k(\text{O}_3 + \alpha\text{-pinene}) = (7.99 \pm 1.20) \times 10^{-17} \text{ cm}^3 \text{ molecule}^{-1} \text{ s}^{-1}$  was also derived.



- (c)  $k$  determined from the observed first-order rate of ozone decay (measured with a UV absorption monitor) in the presence of known excess concentrations of  $\alpha$ -pinene (measured by PTR-MS) and cyclohexane to scavenge HO radicals. Experiments were carried out at atmospheric pressure in a thermostatically-controlled 84.3 m<sup>3</sup> aluminium chamber.
- (d)  $k$  determined from the observed first-order rate of ozone decay (measured with a chemiluminescence analyzer) in the presence of known excess concentrations of  $\alpha$ -pinene, in a flow reactor at a total pressure of  $\sim 1$  bar.
- (e) The concentrations of a series of alkenes (including  $\alpha$ -pinene and *cis*-but-2-ene, the reference compound) were monitored by GC in a 520 L Pyrex chamber at  $\sim 1$  bar pressure of purified air in the presence of O<sub>3</sub>. The measured rate coefficient ratio  $k(\text{O}_3 + \alpha\text{-pinene})/k(\text{O}_3 + \textit{cis}\text{-but-2-ene})$  is placed on an absolute basis using a rate coefficient at 297 K of  $k(\text{O}_3 + \textit{cis}\text{-but-2-ene}) = 1.29 \times 10^{-16} \text{ cm}^3 \text{ molecule}^{-1} \text{ s}^{-1}$  (IUPAC, current recommendation). Details concerning the reactant mixtures and the presence or absence of an HO radical scavenger were not reported.
- (f) The concentrations of  $\alpha$ -pinene and but-1-ene or 2-methylpropene (the reference compounds) were monitored by MS in reacting O<sub>3</sub> -  $\alpha$ -pinene - but-1-ene (or 2-methylpropene) - acetaldehyde (or ethanol) [HO radical scavengers] - He mixtures in a 192 cm<sup>3</sup> volume quartz vessel at  $\sim 1$  bar pressure. The measured rate coefficient ratios  $k(\text{O}_3 + \alpha\text{-pinene})/k(\text{O}_3 + \text{but-1-ene}) = 0.17 \exp[(1190 \pm 87)/T]$  and  $k(\text{O}_3 + \alpha\text{-pinene})/k(\text{O}_3 + 2\text{-methylpropene}) = 0.13 \exp[(1203 \pm 303)/T]$  are placed on an absolute basis using  $k(\text{O}_3 + \text{but-1-ene}) = 3.55 \times 10^{-15} \exp(-1750/T)$  and  $k(\text{O}_3 + 2\text{-methylpropene}) = 2.92 \times 10^{-15} \exp(-1650/T) \text{ cm}^3 \text{ molecule}^{-1} \text{ s}^{-1}$  (IUPAC, current recommendations). Khamaganov and Hites (2001) also report the Arrhenius expression,  $k(\text{O}_3 + \alpha\text{-pinene}) = 4.8 \times 10^{-16} \exp[-(530 \pm 150)/T] \text{ cm}^3 \text{ molecule}^{-1} \text{ s}^{-1}$  over the temperature range 288-363 K and  $k(\text{O}_3 + \alpha\text{-pinene}) = (8.41 \pm 0.74) \times 10^{-17} \text{ cm}^3 \text{ molecule}^{-1} \text{ s}^{-1}$  at 298 K, based on the combined data.
- (g) Relative to  $k(\text{O}_3 + \text{but-1-ene})$ .
- (h) Relative to  $k(\text{O}_3 + 2\text{-methylpropene})$ .
- (i) The concentrations of  $\alpha$ -pinene and 2-methylbut-2-ene (the reference compound) were monitored by GC in reacting O<sub>3</sub> -  $\alpha$ -pinene - 2-methylbut-2-ene - *m*-xylene (the HO radical scavenger) - air mixtures in a flow system at 100 mbar pressure. The measured rate coefficient ratio of  $k(\text{O}_3 + \alpha\text{-pinene})/k(\text{O}_3 + 2\text{-methylbut-2-ene}) = 0.270 \pm 0.022$  is placed on an absolute basis using a rate coefficient at 295 K of  $k(\text{O}_3 + 2\text{-methylbut-2-ene}) = 3.92 \times 10^{-16} \text{ cm}^3 \text{ molecule}^{-1} \text{ s}^{-1}$  (Atkinson and Arey, 2003a).
- (j) The concentrations of  $\alpha$ -pinene and cyclohexene or *cis*-cyclooctene (the reference compounds) were monitored by FT-IR in reacting O<sub>3</sub> -  $\alpha$ -pinene - reference compound - cyclohexane (HO radical scavenger) - air mixtures in a 7300 L Teflon chamber at  $\sim 1$  bar pressure. The measured rate coefficient ratios,  $k(\text{O}_3 + \alpha\text{-pinene})/k(\text{O}_3 + \text{cyclohexene}) = 1.09 \pm 0.10$  and  $k(\text{O}_3 + \alpha\text{-pinene})/k(\text{O}_3 + \textit{cis}\text{-cyclooctene}) = 0.27 \pm 0.01$ , are placed on an absolute basis using  $k(\text{O}_3 + \text{cyclohexene}) = 8.50 \times 10^{-17}$  and  $k(\text{O}_3 + \textit{cis}\text{-cyclooctene}) = 3.80 \times 10^{-16} \text{ cm}^3 \text{ molecule}^{-1} \text{ s}^{-1}$  at 302 K (Atkinson and Arey, 2003a).
- (k) Relative to  $k(\text{O}_3 + \text{cyclohexene})$ .
- (l) Relative to  $k(\text{O}_3 + \textit{cis}\text{-cyclooctene})$ .
- (m) The concentrations of  $\alpha$ -pinene and cycloheptene (the reference compound) were monitored by GC-FID in flowing mixtures of O<sub>3</sub>,  $\alpha$ -pinene, cycloheptene, cyclohexane (the HO radical scavenger) and air at 760 Torr (1.013 bar) pressure. The measured rate coefficient ratio of  $k(\text{O}_3 + \alpha\text{-pinene})/k(\text{O}_3 + \text{cycloheptene}) = 0.453 \pm 0.036$  is placed on an absolute basis using a rate coefficient at 298 K of  $k(\text{O}_3 + \text{cycloheptene}) = 2.50 \times 10^{-16} \text{ cm}^3 \text{ molecule}^{-1} \text{ s}^{-1}$  (Atkinson and Arey, 2003a).

## Preferred Values

| Parameter                                              | Value                               | T/K     |
|--------------------------------------------------------|-------------------------------------|---------|
| $k / \text{cm}^3 \text{ molecule}^{-1} \text{ s}^{-1}$ | $9.6 \times 10^{-17}$               | 298     |
| $k / \text{cm}^3 \text{ molecule}^{-1} \text{ s}^{-1}$ | $8.22 \times 10^{-16} \exp(-640/T)$ | 240-370 |
| <i>Reliability</i>                                     |                                     |         |
| $\Delta \log k$                                        | $\pm 0.15$                          | 298     |
| $\Delta E/R$                                           | $\pm 300$                           | 240-370 |

### Comments on Preferred Values

The room temperature rate coefficients reported by Ripperton et al. (1972), Japar et al. (1974) and Grimsrud et al. (1975) are significantly higher than the more recent measurements of Atkinson et al. (1982, 1990), Nolting et al. (1988), Khamaganov and Hites (2001), Witter et al. (2002), Tillmann et al. (2009), Bernard et al. (2012) and Stewart et al. (2013); although there is still a significant amount of scatter between the room temperature rate coefficients of these more recent measurements. The preferred temperature dependence is obtained from a simple average of the temperature dependences obtained by Atkinson et al. (1982), Khamaganov and Hites (2001) and Tillmann et al. (2009). The preferred 298 K rate coefficient is an average of those of Atkinson et al. (1982, 1990), Nolting et al. (1988), Khamaganov and Hites (2001), Witter et al. (2002), Tillmann et al. (2009), Bernard et al. (2012) and Stewart et al. (2013), corrected to 298 K where necessary using the preferred temperature dependence. The pre-exponential factor is adjusted to fit the 298 K preferred value.

Product yields and mechanistic information have been reported in a number of studies, as summarized in the reviews of Atkinson and Arey (2003b) and Johnson and Marston (2008). The reaction proceeds by initial addition of  $\text{O}_3$  to the  $\text{C}=\text{C}$  bond in  $\alpha$ -pinene to form a “primary ozonide (POZ)” which rapidly decomposes, mainly to form two carbonyl-substituted Criegee intermediates ((I) and (II)), as represented in the following schematic:

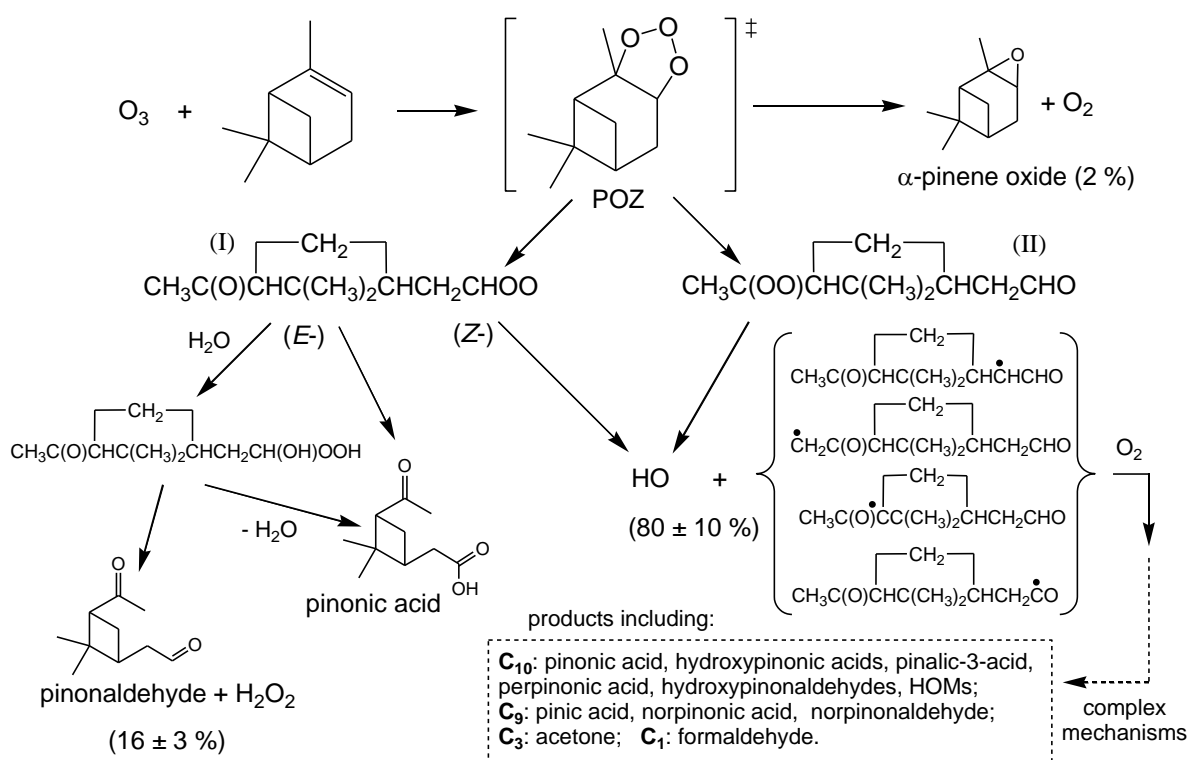

The stabilization of the Criegee intermediates is reported to be limited, with a preferred stabilized Criegee intermediate (sCI) yield of  $0.18 \pm 0.05$  recommended at atmospheric pressure, based on the determinations of Sipilä et al. (2014) (adjusted using the preferred value of  $k$ ) and Newland et al. (2018), and also consistent with Drozd and Donahue (2011). Whether excited or stabilized, the *Z*- conformer of Criegee intermediate (I) and Criegee intermediate (II) mainly decompose to form HO radicals and a number of  $\beta$ -oxo alkyl radicals, as shown in the schematic. The further chemistry of the  $\beta$ -oxo alkyl radicals may form a number of reported multifunctional organic products containing hydroxy, hydroperoxy, carbonyl and acid functionalities (e.g. Johnson and Marston, 2008), including a small yield of highly oxidized multifunctional organic compounds, HOMs, with very high oxygen to carbon ratios (e.g. Ehn et al., 2012). Direct and indirect evidence for the formation of HO radicals has been reported in numerous studies (Atkinson et al., 1992; Chew and Atkinson, 1996; Paulson et al., 1998; Rickard et al., 1999; Siese et al., 2001; Aschmann et al., 2002; Berndt et al., 2003; Presto and Donahue, 2004; Forester and Wells, 2011), with yields in the range 0.68-0.91 (preferred value,  $0.80 \pm 0.10$ ). Formation of HO via the accepted decomposition mechanism (involving abstraction of a  $\beta$ -hydrogen via a vinyl hydroperoxide intermediate) is not possible for the *E*- conformer of Criegee Intermediate (I) (e.g. see Johnson and Marston, 2008). If stabilized, this is expected to react predominantly with H<sub>2</sub>O under atmospheric conditions, leading to the formation of pinonaldehyde and H<sub>2</sub>O<sub>2</sub>, or pinonic acid. Consensus yields are shown for  $\alpha$ -pinene oxide and pinonaldehyde.

## References

- Aschmann, S. M., Arey, J. and Atkinson, R.: Atmos. Environ., 36, 4347, 2002.
- Atkinson, R. and Arey, J.: Chem. Rev., 103, 4605, 2003a.
- Atkinson, R. and Arey, J.: Atmos. Environ., 37 Suppl. 2, S197, 2003b.
- Atkinson, R., Winer, A. M. and Pitts Jr., J. N.: Atmos. Environ., 16, 1017, 1982.
- Atkinson, R., Hasegawa, D. and Aschmann, S. M.: Int. J. Chem. Kinet., 22, 871, 1990.
- Atkinson, R., Aschmann, S. M., Arey, J. and Shorees, B.: J. Geophys. Res., 97, 6065, 1992.
- Bernard, F., Fedioun, I., Peyroux, F., Quilgars, A., Daële, V. and Mellouki, A.: J. Aerosol Sci., 43, 14, 2012.
- Berndt, T., Böge, O and Stratmann, F: Atmos. Environ., 37, 3933, 2003.
- Chew, A. A. and Atkinson, R.: J. Geophys. Res., 101, 28649, 1996.
- Drozd, G. T. and Donahue, N. M.: J. Phys. Chem. A, 115, 4381, 2011.
- Ehn, M., Kleist, E., Junninen, H., Petäjä, T., Lönn, G., Schobesberger, S., Dal Maso, M., Trimborn, A., Kulmala, M., Worsnop, D. R., Wahner, A., Wildt, J., and Mentel, Th. F.: Atmos. Chem. Phys., 12, 5113, 2012.
- Forester, C. D. and Wells, J. R.: Indoor Air, 21, 400, 2011.
- Grimsrud, E. P., Westberg, H. H. and Rasmussen, R. A.: Int. J. Chem. Kinet., Symp. 1, 183, 1975.
- Japar, S. M., Wu, C. H. and Niki, H.: Environ. Lett., 7, 245, 1974.
- Johnson, D. and Marston, G.: Chem. Soc. Rev., 37, 699, 2008.
- Khamaganov, V. G. and Hites, R. A.: J. Phys. Chem. A, 105, 815, 2001.
- Newland, M. J., Rickard, A. R., Sherwen, T., Evans, M. J., Vereecken, L., Muñoz, A., Ródenas, M., and Bloss, W. J.: Atmos. Chem. Phys., 18, 6095, 2018.
- Nolting, F., Behnke, W. and Zetzsch, C.: J. Atmos. Chem., 6, 47, 1988.
- Paulson, S. E., Chung, M., Sen, A. D. and Orzechowska, G.: J. Geophys. Res.-Atmos., 103, 25533, 1998.
- Presto, A. A. and Donahue, N. M.: J. Phys. Chem. A, 108, 9096, 2004.
- Rickard, A. R., Johnson, D., McGill, C. D. and Marston, G.: J. Phys. Chem. A, 103, 7656, 1999.
- Ripperton, L. A., Jeffries, H. E. and White, O.: Adv. Chem. Ser., 113, 219, 1972.
- Siese, M., Becker, K. H., Brockmann, K. J., Geiger, H., Hofzumahaus, A., Holland, F., Mihelcic, D. and Wirtz, K.: Environ. Sci. Technol., 35, 4660, 2001.

Sipilä, M., Jokinen, T., Berndt, T., Richters, S., Makkonen, R., Donahue, N. M., Mauldin III, R. L., Kurtén, T., Paasonen, P., Sarnela, N., Ehn, M., Junninen, H., Rissanen, M. P., Thornton, J., Stratmann, F., Herrmann, H., Worsnop, D. R., Kulmala, M., Kerminen, V.-M., and Petäjä, T.: Atmos. Chem. Phys., 14, 12143, 2014.

Stewart, D. J., Almarok, S. H., Lockhart, J. P., Mohamed, O. M., Nutt, D. R., Pfrang, C., Marston, G.: Atmos. Environ., 70, 227, 2013.

Tillmann, R., Saathoff, H., Brauers, T., Kiendler-Scharra, A. and Mentel, T. F.: Phys. Chem. Chem. Phys., 11, 2323, 2009.

Witter, M., Berndt, T., Böge, O., Stratmann, F. and Heintzenberg, J.: Int. J. Chem. Kinet., 34, 394, 2002.

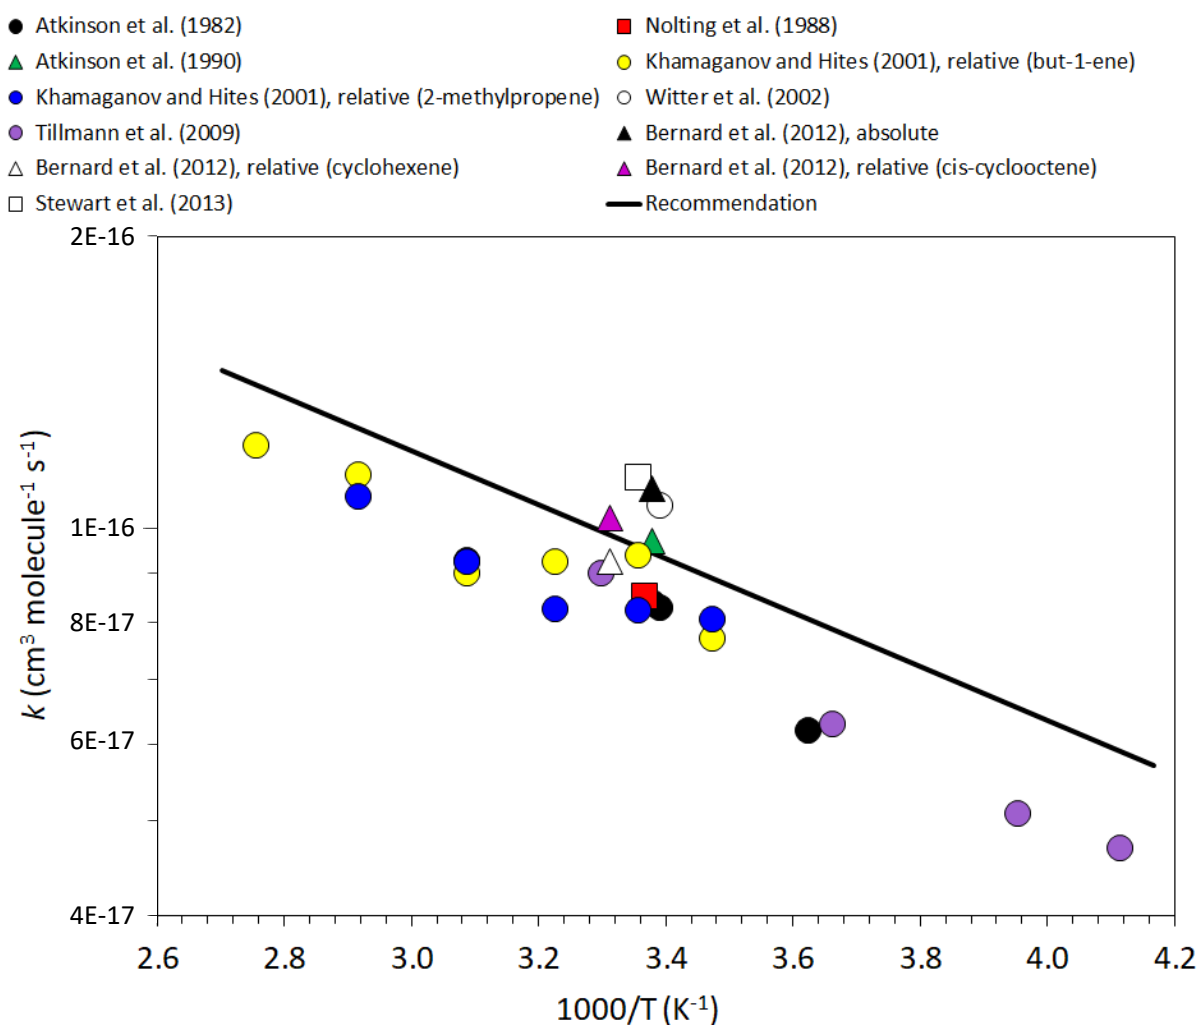

**Ox\_VOC19:  $\beta$ -pinene**

Last evaluated: August 2020; Last change in preferred values: August 2018

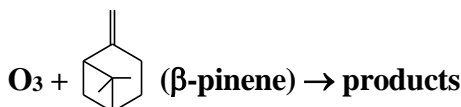**Rate coefficient data**

| $k/\text{cm}^3 \text{ molecule}^{-1} \text{ s}^{-1}$ | Temp./K     | Reference                  | Technique/ Comments |
|------------------------------------------------------|-------------|----------------------------|---------------------|
| <i>Absolute Rate Coefficients</i>                    |             |                            |                     |
| $6.5 \times 10^{-17}$                                | 294         | Ripperton et al., 1972     | S-CL                |
| $3.6 \times 10^{-17}$                                | $295 \pm 1$ | Grimsrud et al., 1975      | F-CL                |
| $(2.1 \pm 0.5) \times 10^{-17}$                      | $296 \pm 2$ | Atkinson et al., 1982      | S-CL/GC (a)         |
| $(1.48 \pm 0.17) \times 10^{-17}$                    | $296 \pm 2$ | Atkinson et al., 1990      | S-CL/GC (b)         |
| $(1.22 \pm 0.13) \times 10^{-17}$                    | $295 \pm 1$ | Grosjean et al., 1993      | S-UVA (c)           |
| <i>Relative Rate Coefficients</i>                    |             |                            |                     |
| $(1.39 \pm 0.20) \times 10^{-17}$                    | $297 \pm 2$ | Nolting et al., 1988       | RR-GC (d)           |
| $(1.82 \pm 0.22) \times 10^{-17}$                    | $296 \pm 2$ | Atkinson et al., 1990      | RR-GC (e)           |
| $(2.39 \pm 0.27) \times 10^{-17}$                    | $298 \pm 2$ | Johnson et al., 2000       | RR-GC (f)           |
| $1.72 \times 10^{-15} \exp[-(1278 \pm 84)/T]$        | 298-363     | Khamaganov and Hites, 2001 | RR-MS (g,h)         |
| $(2.34 \pm 0.13) \times 10^{-17}$                    | 298         |                            |                     |
| $(2.25 \pm 0.19) \times 10^{-17}$                    | 298         | Khamaganov and Hites, 2001 | RR-MS (g,i)         |

 $\beta$ -pinene is 6,6-dimethyl-2-methylene-bicyclo[3.1.1]heptane**Comments**

- (a)  $k$  determined from the observed first-order rate of ozone decay (measured with a chemiluminescence analyzer) in the presence of known excess concentrations of  $\beta$ -pinene (measured by GC-FID). Experiments were carried out either in a 175 L Teflon bag or in the SAPRC 5800 L Teflon-coated environmental chamber.
- (b)  $k$  determined from the observed first-order rate of ozone decay (measured with a chemiluminescence analyzer) in the presence of known excess concentrations of  $\beta$ -pinene (measured by GC-FID). Experiments were carried out in a 160 L Teflon chamber.
- (c)  $k$  determined from the observed first-order rate of ozone decay (measured by UV photometry) in the presence of excess concentrations of  $\beta$ -pinene, with cyclohexane to scavenge HO radicals. Experiments were carried out in a 3.5 m<sup>3</sup> Teflon chamber.
- (d) The concentrations of a series of alkenes (including  $\beta$ -pinene and *cis*-but-2-ene, the reference compound) were monitored by GC in a 520 L Pyrex chamber at ~1 bar pressure of purified air in the presence of O<sub>3</sub>. The measured rate coefficient ratio  $k(\text{O}_3 + \beta\text{-pinene})/k(\text{O}_3 + \textit{cis}\text{-but-2-ene})$  is placed on an absolute basis using a rate coefficient of  $k(\text{O}_3 + \textit{cis}\text{-but-2-ene}) = 1.29 \times 10^{-16} \text{ cm}^3 \text{ molecule}^{-1} \text{ s}^{-1}$  at 297 K (IUPAC, current recommendation). Details concerning the reactant mixtures and the presence or absence of an HO radical scavenger were not reported.
- (e) The concentrations of a series of alkenes (including  $\beta$ -pinene and  $\alpha$ -pinene, the reference compound), with cyclohexane to scavenge HO radicals, were monitored by GC-FID in a 3600 L Teflon chamber at 740 Torr (990 mbar) pressure of purified air in the presence of O<sub>3</sub>. The measured rate coefficient ratio  $k(\text{O}_3 + \beta\text{-pinene})/k(\text{O}_3 + \alpha\text{-pinene})$  is placed on an absolute basis using  $k(\text{O}_3 +$

- $\alpha$ -pinene) =  $9.46 \times 10^{-17} \text{ cm}^3 \text{ molecule}^{-1} \text{ s}^{-1}$  at 296 K (IUPAC, current recommendation).
- (f) The concentrations of  $\beta$ -pinene and 2-methylpropene (the reference compound), with cyclohexane to scavenge HO radicals, were monitored by GC-FID in a 50 L collapsible Teflon chamber at 760 Torr (1013 mbar) pressure of purified air in the presence of  $\text{O}_3$ . The measured rate coefficient ratio  $k(\text{O}_3 + \beta\text{-pinene})/k(\text{O}_3 + 2\text{-methylpropene})$  is placed on an absolute basis using  $k(\text{O}_3 + 2\text{-methylpropene}) = 1.15 \times 10^{-17} \text{ cm}^3 \text{ molecule}^{-1} \text{ s}^{-1}$  at 298 K (IUPAC, current recommendation).
- (g) The concentrations of  $\beta$ -pinene and *cis*-but-2-ene or but-1-ene (the reference compounds) were monitored by MS in reacting  $\text{O}_3$  -  $\beta$ -pinene - *cis*-but-2-ene (or but-1-ene) - acetaldehyde (or ethanol) - He mixtures in a  $192 \text{ cm}^3$  volume quartz vessel at  $\sim 1$  bar pressure, with acetaldehyde or ethanol being present to scavenge HO radicals. The measured rate coefficient ratios  $k(\text{O}_3 + \beta\text{-pinene})/k(\text{O}_3 + \textit{cis}$ -but-2-ene) =  $0.51 \exp[(-308 \pm 84)/T]$  and  $k(\text{O}_3 + \beta\text{-pinene})/k(\text{O}_3 + \text{but-1-ene}) = (2.25 \pm 0.19)$  at 298 K are placed on an absolute basis using  $k(\text{O}_3 + \textit{cis}$ -but-2-ene) =  $3.37 \times 10^{-15} \exp(-970/T)$  and  $k(\text{O}_3 + \text{but-1-ene}) = 1.0 \times 10^{-17} \text{ cm}^3 \text{ molecule}^{-1} \text{ s}^{-1}$  at 298 K (IUPAC, current recommendations).
- (h) Relative to  $k(\text{O}_3 + \textit{cis}$ -but-2-ene). Identical rate coefficients obtained at 298 K for two enantiomers of  $\beta$ -pinene, (+)- $\beta$ -pinene and (-)- $\beta$ -pinene, indicating no associated steric effects on the reaction. Measurements at other temperatures obtained using (+)- $\beta$ -pinene.
- (i) Relative to  $k(\text{O}_3 + \text{but-1-ene})$ , using (+)- $\beta$ -pinene.

#### Preferred Values

| Parameter                                              | Value                                | T/K     |
|--------------------------------------------------------|--------------------------------------|---------|
| $k / \text{cm}^3 \text{ molecule}^{-1} \text{ s}^{-1}$ | $1.9 \times 10^{-17}$                | 298     |
| $k / \text{cm}^3 \text{ molecule}^{-1} \text{ s}^{-1}$ | $1.39 \times 10^{-15} \exp(-1280/T)$ | 290-370 |
| <i>Reliability</i>                                     |                                      |         |
| $\Delta \log k$                                        | $\pm 0.25$                           | 298     |
| $\Delta E/R$                                           | $\pm 300$                            | 290-370 |

#### Comments on Preferred Values

The room temperature rate coefficients reported by Ripperton et al. (1972) and Grimsrud et al. (1975) are significantly higher than the more recent measurements of Atkinson et al. (1982, 1990), Nolting et al. (1988), Grosjean et al. (1993), Johnson et al. (2000) and Khamaganov and Hites (2001); although there is still a significant amount of scatter between the room temperature rate coefficients of these more recent measurements. The preferred temperature dependence is based on that reported by Khamaganov and Hites (2001). The preferred 298 K rate coefficient is an average of those of Atkinson et al. (1982, 1990), Nolting et al. (1988), Grosjean et al. (1993), Johnson et al. (2000) and Khamaganov and Hites (2001), corrected to 298 K where necessary using the preferred temperature dependence. The pre-exponential factor is adjusted to fit the 298 K preferred value.

The reaction proceeds by initial addition of  $\text{O}_3$  to the C=C bond to form a “primary ozonide (POZ)” which rapidly decomposes to form two sets of “primary” carbonyl product plus Criegee intermediate, as shown in the following schematic:

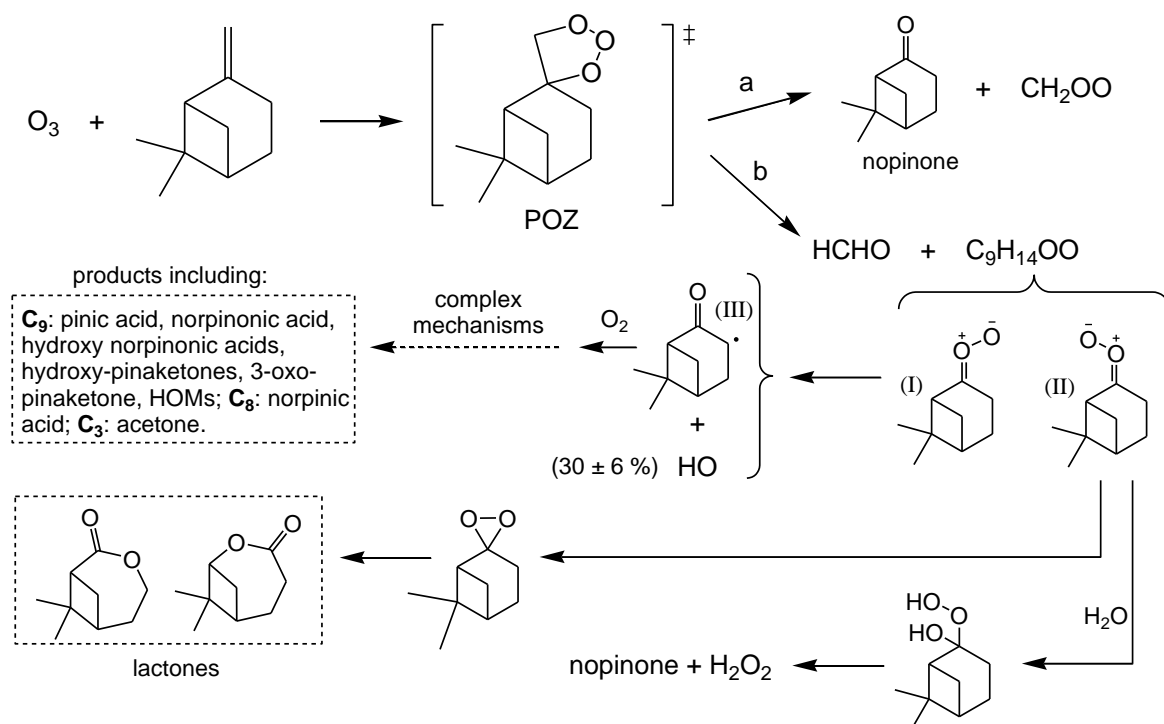

Product yields have been reported in a number of studies, allowing some possible features of the subsequent mechanism to be characterized. The carbonyl compound, nopinone, has been reported to be formed with yields in the range 16 % to 23 % under dry conditions in the presence of an HO radical scavenger (Grosjean et al., 1993; Hakola et al., 1994; Yu et al., 1999; Winterhalter et al., 2000; Ma and Marston, 2008), suggesting a relative importance of the two decomposition channels,  $k_b/k_a \approx 4$ . The dominance of channel (b) is also supported by the results of theoretical studies (Zhang and Zhang, 2005; Nguyen et al., 2009). Reported yields of HCHO are also consistent with channel (b) being the major decomposition route for POZ (e.g. Atkinson and Arey, 2003), although it is likely partially sequestered in the form of a secondary ozonide following reaction with the C<sub>9</sub> Criegee intermediate, C<sub>9</sub>H<sub>14</sub>OO, under many reported experimental conditions (e.g. see Winterhalter et al., 2000; Carlsson et al., 2012).

The Criegee intermediate, CH<sub>2</sub>OO (formed from the minor channel (a)), is expected to be almost fully stabilised at atmospheric pressure (Nguyen et al., 2009). Based on reported kinetic data (summarised and evaluated in datasheets CGI\_1 to CGI\_12), the major fate of CH<sub>2</sub>OO under tropospheric conditions is expected to be removal via bimolecular reactions, particularly with (H<sub>2</sub>O)<sub>2</sub>. Substantial stabilisation of the major C<sub>9</sub> Criegee intermediate, C<sub>9</sub>H<sub>14</sub>OO (formed from channel (b)), has also been reported (Winterhalter et al., 2000; Ahrens et al., 2014), based on scavenging with added H<sub>2</sub>O or SO<sub>2</sub> and quantification of the additional nopinone formed. A corresponding yield of  $0.35 \pm 0.05$  was reported by Winterhalter et al. (2000), with support from the subsequent theoretical study of Nguyen et al. (2009). Taking account of the additional contribution of CH<sub>2</sub>OO, this is consistent with a total stabilised Criegee intermediate (sCI) yield of about 0.5, which agrees with that reported by Newland et al (2018),  $0.60 \pm 0.03$ , based on scavenging of both CH<sub>2</sub>OO and C<sub>9</sub>H<sub>14</sub>OO and with added SO<sub>2</sub> and quantifying its removal. Based on these observations, we recommend an sCI yield of  $0.55 \pm 0.10$ .

Indirect evidence for the formation of HO radicals from  $\beta$ -pinene ozonolysis has been reported by Atkinson et al. (1992) and Rickard et al. (1999), with respective yields of  $0.35^{+0.18}_{-0.12}$  and  $0.26 \pm 0.06$  (preferred value,  $0.30 \pm 0.06$ ). This is expected to result from reactions of the Criegee intermediate C<sub>9</sub>H<sub>14</sub>OO formed in channel (b), which has the two conformers, (I) and (II), shown in the schematic. In practice, formation of HO via the accepted decomposition mechanism (involving abstraction of a  $\beta$ -hydrogen via a vinyl hydroperoxide intermediate) may only be possible for conformer (I), owing to the relevant  $\beta$ -hydrogen in conformer (II) being at the bridgehead of a constrained bicyclic structure (e.g. see

Rickard et al., 1999; Nguyen et al., 2009); and this helps to explain the relatively low HO yield from  $\beta$ -pinene ozonolysis. The alternative decomposition route, via a dioxirane intermediate, is available for conformer (II), and formation of the lactone products has been reported (Griesbaum et al., 1998). However, if stabilized, conformer (II) is likely to react predominantly with  $\text{H}_2\text{O}$  under atmospheric conditions (Vereecken et al., 2017), forming additional nopinone and  $\text{H}_2\text{O}_2$ , for which evidence was reported by Winterhalter et al. (2000) and Ma and Marston (2008). The generation of HO is accompanied by the formation of the  $\beta$ -oxo alkyl radical (III), the further chemistry of which may form a number of reported multifunctional organic products containing hydroxy, carbonyl and acid functionalities (e.g. Winterhalter et al., 2000; Ma and Marston, 2008), including a small yield of highly oxidized multifunctional organic compounds, HOMs, with very high oxygen to carbon ratios (e.g. Ehn et al., 2012).

## References

- Ahrens, J., Carlsson, P. T. M., Hertl, N., Olzmann, M., Pfeifle, M., Wolf, J. L. and Zeuch, T.: *Angew. Chem. Int. Ed.*, 53, 715, 2014.
- Atkinson, R. and Arey, J.: *Atmos. Environ.*, 37 Suppl. 2, S197, 2003.
- Atkinson, R., Winer, A. M. and Pitts Jr., J. N.: *Atmos. Environ.*, 16, 1017, 1982.
- Atkinson, R., Hasegawa, D. and Aschmann, S. M.: *Int. J. Chem. Kinet.*, 22, 871, 1990.
- Atkinson, R., Aschmann, S. M., Arey, J. and Shorees, B.: *J. Geophys. Res.*, 97, 6065, 1992.
- Carlsson, P. T. M., Keunecke, C., Krüger, B. C., Maaß, M. C. and Zeuch, T.: *Phys. Chem. Chem. Phys.*, 14, 15637, 2012.
- Ehn, M., Kleist, E., Junninen, H., Petäjä, T., Lönn, G., Schobesberger, S., Dal Maso, M., Trimborn, A., Kulmala, M., Worsnop, D. R., Wahner, A., Wildt, J., and Mentel, Th. F.: *Atmos. Chem. Phys.*, 12, 5113, 2012.
- Griesbaum, K., Miclaus, V., and Jung, I. C.: *Environ. Sci. Technol.*, 32, 647, 1998.
- Grimsrud, E. P., Westberg, H. H. and Rasmussen, R. A.: *Int. J. Chem. Kinet., Symp.* 1, 183, 1975.
- Grosjean, D., Williams II, E. L., Grosjean, E., Andino, J. M. and Seinfeld, J. H.: *Environ. Sci. Technol.*, 27, 2754, 1993.
- Hakola, H., Arey, J., Aschmann, S. M., and Atkinson, R.: *J. Atmos. Chem.* 18, 75, 1994.
- Hatakeyama, S., Izumi, K., Fukuyama, T., and Akimoto, H.: *J. Geophys. Res.*, 94, 13013, 1989.
- Johnson, D., Rickard, A. R., McGill, C. D. and Marston, G.: *Phys. Chem. Chem. Phys.*, 2, 323, 2000.
- Khamaganov, V. G. and Hites, R. A.: *J. Phys. Chem. A*, 105, 815, 2001.
- Ma, Y. and Marston, G.: *Phys. Chem. Chem. Phys.*, 10, 6115, 2008.
- Newland, M. J., Rickard, A. R., Sherwen, T., Evans, M. J., Vereecken, L., Muñoz, A., Ródenas, M., and Bloss, W. J.: *Atmos. Chem. Phys.*, 18, 6095, 2018.
- Nguyen, T. L., Peeters, J. and Vereecken, L.: *Phys. Chem. Chem. Phys.*, 11, 5643, 2009.
- Nolting, F., Behnke, W. and Zetzsch, C.: *J. Atmos. Chem.*, 6, 47, 1988.
- Rickard, A. R., Johnson, D., McGill, C. D. and Marston, G.: *J. Phys. Chem. A*, 103, 7656, 1999.
- Ripperton, L. A., Jeffries, H. E. and White, O.: *Adv. Chem. Ser.*, 113, 219, 1972.
- Vereecken, L., Novelli, A. and Taraborrelli, D.: *Phys. Chem. Chem. Phys.*, 19, 31599, 2017.
- Winterhalter, R., Neeb, P., Grossmann, D., Kolloff, A., Horie, O. and Moortgat, G.: *J. Atmos. Chem.*, 35, 165, 2000.
- Yu, J., Cocker III, D. R., Griffin, R. J., Flagan, R. C. and Seinfeld, J. H.: *J. Atmos. Chem.*, 34, 207, 1999.
- Zhang, D. and Zhang, R.: *J. Chem. Phys.*, 122, 114308, 2005.



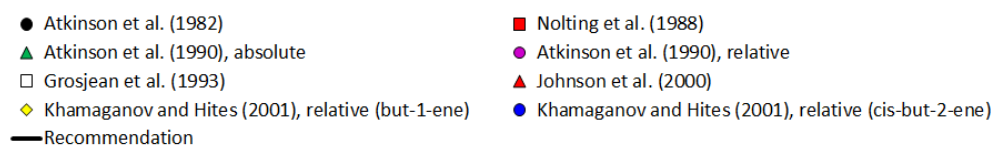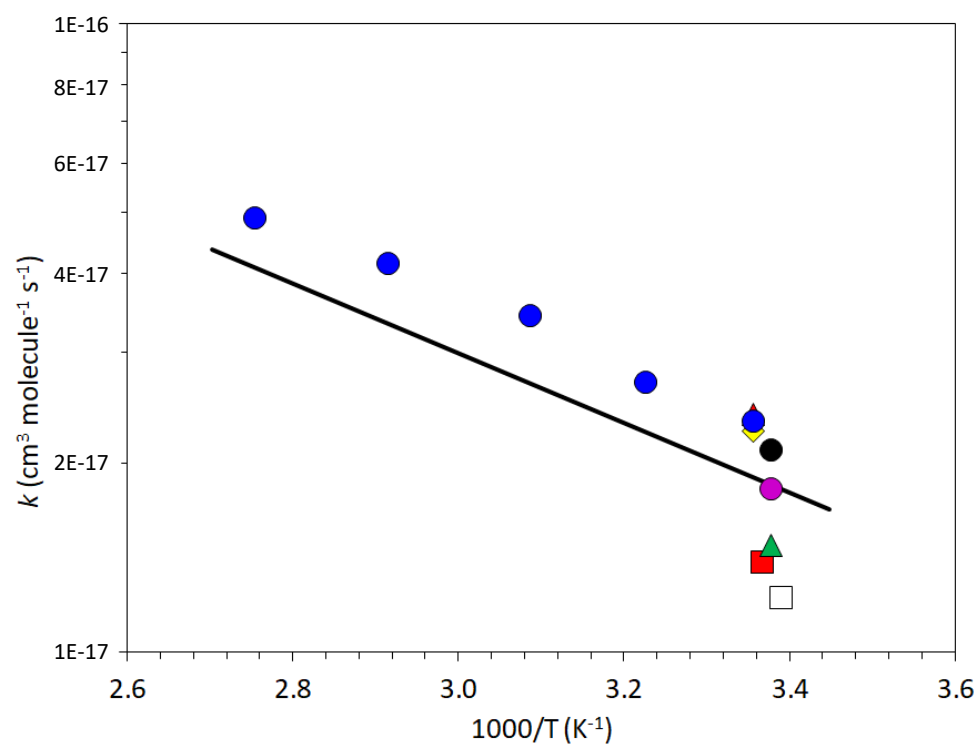

**Ox\_VOC20: limonene**

Last evaluated: August 2020; Last change in preferred values: August 2018

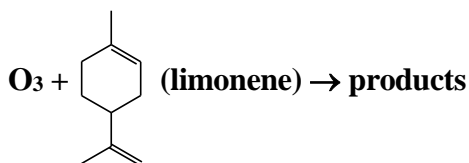**Rate coefficient data**

| $k/\text{cm}^3 \text{ molecule}^{-1} \text{ s}^{-1}$ | Temp./K       | Reference                  | Technique/Comments |
|------------------------------------------------------|---------------|----------------------------|--------------------|
| <i>Absolute Rate Coefficients</i>                    |               |                            |                    |
| $6.4 \times 10^{-16}$                                | $295 \pm 1$   | Grimsrud et al., 1975      | F-CL               |
| $3.5 \times 10^{-16}$                                | 297.3         | Zhang et al., 1994         | S-CL/GC (a)        |
| $(3.8 \pm 0.3) \times 10^{-16}$                      | $297 \pm 1$   | Bernard et al., 2012       | F-CL (b)           |
| <i>Relative Rate Coefficients</i>                    |               |                            |                    |
| $(2.27 \pm 0.23) \times 10^{-16}$                    | $296 \pm 2$   | Atkinson et al., 1990      | RR-GC (c)          |
| $(2.10 \pm 0.07) \times 10^{-16}$                    | $296 \pm 2$   | Shu and Atkinson, 1994     | RR-GC (d)          |
| $2.97 \times 10^{-15} \exp[-(771 \pm 76)/T]$         | 298-363       | Khamaganov and Hites, 2001 | RR-MS (e,f)        |
| $(2.24 \pm 0.16) \times 10^{-16}$                    | 298           |                            |                    |
| $(2.20 \pm 0.19) \times 10^{-16}$                    | 298           | Khamaganov and Hites, 2001 | RR-MS (e,g)        |
| $(2.06 \pm 0.21) \times 10^{-16}$                    | 298           | Khamaganov and Hites, 2001 | RR-MS (e,h)        |
| $(2.44 \pm 0.30) \times 10^{-16}$                    | $295 \pm 0.5$ | Witter et al., 2002        | RR-GC (i)          |
| $(1.95 \pm 0.17) \times 10^{-16}$                    | $302 \pm 1$   | Bernard et al., 2012       | RR-IR (j,k)        |
| $(2.10 \pm 0.31) \times 10^{-16}$                    | $303 \pm 1$   |                            | RR-IR (j,l)        |

limonene is 4-isopropenyl-1-methyl-cyclohexene

**Comments**

- (a)  $k$  determined from the observed first-order rate of ozone decay (measured with a chemiluminescence analyzer) in an experiment with a known excess concentration of limonene (measured by GC-FID), in a 4300 L Teflon chamber.
- (b)  $k$  determined from the observed first-order rate of ozone decay (measured with a chemiluminescence analyzer) in the presence of known excess concentrations of limonene, in a flow reactor at a total pressure of ~1 bar.
- (c) The concentrations of a series of alkenes (including limonene and  $\alpha$ -pinene, the reference compound), with cyclohexane to scavenge HO radicals, were monitored by GC-FID in a 3600 L Teflon chamber at 740 Torr (990 mbar) pressure of purified air in the presence of O<sub>3</sub>. The measured rate coefficient ratio  $k(\text{O}_3 + \text{limonene})/k(\text{O}_3 + \alpha\text{-pinene})$  is placed on an absolute basis using  $k(\text{O}_3 + \alpha\text{-pinene}) = 9.46 \times 10^{-17} \text{ cm}^3 \text{ molecule}^{-1} \text{ s}^{-1}$  at 296 K (IUPAC, current recommendation).
- (d) The concentrations of limonene and *cis*-but-2-ene (the reference compound), with cyclohexane to scavenge HO radicals, were monitored by GC-FID in 6400–6900 L all Teflon chambers at 740 Torr (990 mbar) pressure of purified air in the presence of O<sub>3</sub>. The measured rate coefficient ratio  $k(\text{O}_3 + \text{limonene})/k(\text{O}_3 + \text{cis-but-2-ene})$  is placed on an absolute basis using  $k(\text{O}_3 + \text{cis-but-2-ene}) = 1.27 \times 10^{-16} \text{ cm}^3 \text{ molecule}^{-1} \text{ s}^{-1}$  at 296 K (IUPAC, current recommendation).
- (e) The concentrations of limonene and *cis*-but-2-ene, but-1-ene or 2-methylpropene (the reference compounds) were monitored by MS in reacting O<sub>3</sub> - limonene - reference compound - acetaldehyde (or ethanol) - He mixtures in a 192 cm<sup>3</sup> volume quartz vessel at ~1 bar pressure, with acetaldehyde or

ethanol being present to scavenge HO radicals. The measured rate coefficient ratios  $k(\text{O}_3 + \text{limonene})/k(\text{O}_3 + \text{cis-but-2-ene}) = 0.88 \exp[(-199 \pm 76)/T]$ ; and  $k(\text{O}_3 + \text{limonene})/k(\text{O}_3 + \text{but-1-ene}) = (22.04 \pm 1.92)$  and  $k(\text{O}_3 + \text{limonene})/k(\text{O}_3 + \text{2-methylpropene}) = (17.88 \pm 1.84)$  at 298 K are placed on an absolute basis using  $k(\text{O}_3 + \text{cis-but-2-ene}) = 3.37 \times 10^{-15} \exp(-970/T) \text{ cm}^3 \text{ molecule}^{-1} \text{ s}^{-1}$ ; and  $k(\text{O}_3 + \text{but-1-ene}) = 1.0 \times 10^{-17} \text{ cm}^3 \text{ molecule}^{-1} \text{ s}^{-1}$  and  $k(\text{O}_3 + \text{2-methylpropene}) = 1.15 \times 10^{-17} \text{ cm}^3 \text{ molecule}^{-1} \text{ s}^{-1}$  at 298 K (IUPAC, current recommendations).

- (f) Relative to  $k(\text{O}_3 + \text{cis-but-2-ene})$ .
- (g) Relative to  $k(\text{O}_3 + \text{but-1-ene})$ .
- (h) Relative to  $k(\text{O}_3 + \text{2-methylpropene})$ .
- (i) The concentrations of limonene and 2-methylbut-2-ene (the reference compound) were monitored by GC in reacting  $\text{O}_3$  - limonene - 2-methylbut-2-ene - *m*-xylene (the HO radical scavenger) - air mixtures in a flow system at 100 mbar pressure. The measured rate coefficient ratio of  $k(\text{O}_3 + \text{limonene})/k(\text{O}_3 + \text{2-methylbut-2-ene}) = 0.622 \pm 0.024$  is placed on an absolute basis using  $k(\text{O}_3 + \text{2-methylbut-2-ene}) = 3.92 \times 10^{-16} \text{ cm}^3 \text{ molecule}^{-1} \text{ s}^{-1}$  at 295 K (Atkinson and Arey, 2003).
- (j) The concentrations of limonene and cyclohexene or *cis*-cyclooctene (the reference compounds) were monitored by FT-IR in reacting  $\text{O}_3$  - limonene - reference compound - cyclohexane (HO radical scavenger) - air mixtures in a 7300 L Teflon chamber at ~1 bar pressure. The measured rate coefficient ratios,  $k(\text{O}_3 + \text{limonene})/k(\text{O}_3 + \text{cyclohexene}) = 2.3 \pm 0.2$  and  $k(\text{O}_3 + \text{limonene})/k(\text{O}_3 + \text{cis-cyclooctene}) = 0.55 \pm 0.08$ , are placed on an absolute basis using  $k(\text{O}_3 + \text{cyclohexene}) = 8.50 \times 10^{-17} \text{ cm}^3 \text{ molecule}^{-1} \text{ s}^{-1}$  at 302 K and  $k(\text{O}_3 + \text{cis-cyclooctene}) = 3.81 \times 10^{-16} \text{ cm}^3 \text{ molecule}^{-1} \text{ s}^{-1}$  at 303 K (Atkinson and Arey, 2003).
- (k) Relative to  $k(\text{O}_3 + \text{cyclohexene})$ .
- (l) Relative to  $k(\text{O}_3 + \text{cis-cyclooctene})$ .

### Preferred Values

| Parameter                                              | Value                               | T/K     |
|--------------------------------------------------------|-------------------------------------|---------|
| $k / \text{cm}^3 \text{ molecule}^{-1} \text{ s}^{-1}$ | $2.2 \times 10^{-16}$               | 298     |
| $k / \text{cm}^3 \text{ molecule}^{-1} \text{ s}^{-1}$ | $2.91 \times 10^{-15} \exp(-770/T)$ | 290-370 |
| <i>Reliability</i>                                     |                                     |         |
| $\Delta \log k$                                        | $\pm 0.10$                          | 298     |
| $\Delta E/R$                                           | $\pm 300$                           | 290-370 |

### Comments on Preferred Values

The preferred value of the rate coefficient at 298 K is an average of the relative rate coefficient determinations of Atkinson et al. (1990), Shu and Atkinson (1994), Khamaganov and Hites (2001), Witter et al. (2002) and Bernard et al. (2012), which are in very good agreement. The absolute rate coefficient determinations of Zhang et al. (1994) and Bernard et al. (2012) provide measurements of  $k$  that are approaching a factor of two higher than the relative rate determinations. The reason for this consistent discrepancy is currently unknown. The earlier absolute rate coefficient determinations reported by Grimsrud et al. (1975) for limonene, and also for several other terpenes, appear to be systematically high. The preferred temperature dependence is based on that reported by Khamaganov and Hites (2001), with the pre-exponential factor adjusted to return the 298 K preferred value.

The reaction may proceed by initial addition of  $\text{O}_3$  to either of the endocyclic or exocyclic C=C bonds in limonene. Comparison of  $k$  for the reaction of ozone with limonene with that reported for the

reaction of ozone with the limonene oxidation product, limononaldehyde (3-isopropenyl-6-oxo-heptanal), which retains the “exocyclic” C=C bond (Calogirou et al., 1999), suggests that the reaction of O<sub>3</sub> with limonene occurs predominantly (≈ 95 %) at the endocyclic bond. Support for this comes from the low reported yield (≈ 2 %) of the product limona ketone (4-acetyl-1-methylcyclohexene), which is an expected significant product of the ozonolysis of the exocyclic bond (Grosjean et al., 1993; Forester and Wells, 2009).

The addition of O<sub>3</sub> to the endocyclic C=C bond in limonene forms a “primary ozonide (POZ)” which rapidly decomposes, mainly to form two carbonyl-substituted Criegee intermediates ((I) and (II)), as represented in the following schematic:

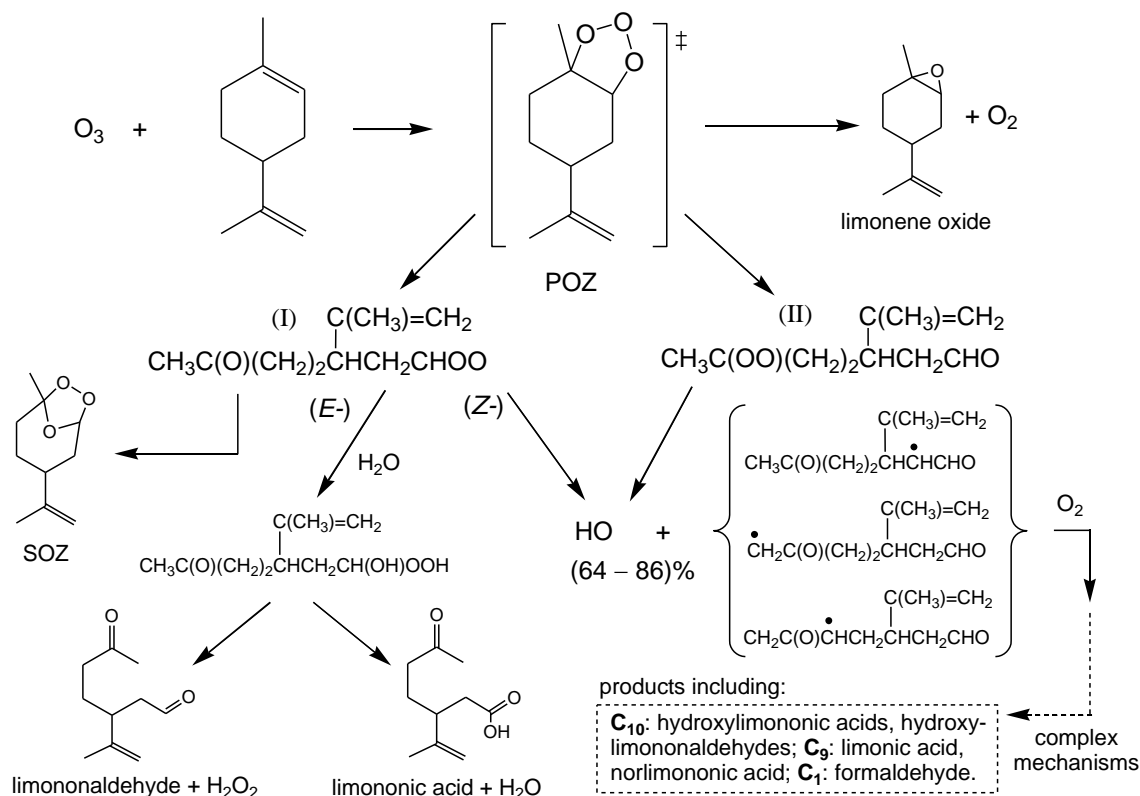

The Criegee intermediates are only partially stabilized under atmospheric conditions, with a preferred stabilized Criegee intermediate (sCI) yield of  $0.27 \pm 0.10$  recommended at atmospheric pressure, based on the determinations Sipilä et al. (2014) (adjusted using the preferred value of  $k$ ) and Newland et al. (2018). Whether excited or stabilized, the Z- conformer of Criegee intermediate (I) and Criegee intermediate (II) mainly decompose to form HO radicals, which are expected to be formed in conjunction with a number of β-oxo alkenyl radicals, as shown in the schematic. HO radical yields in the range 64 % – 86 % (preferred value  $66 \pm 4$  %) have been reported (Atkinson et al., 1992; Aschmann et al., 2002; Herrmann et al., 2010; Forester and Wells, 2011). The further chemistry of the β-oxo alkenyl radicals may form a number of reported multifunctional organic products containing hydroxy, carbonyl and acid functionalities (Glasius et al., 2000; Warscheid and Hoffmann, 2001; Leungsakul et al., 2005; Nørgaard et al., 2013; Hammes et al., 2019), and also formaldehyde, which has been reported to be formed with a yield of 10 % (Grosjean et al., 1993) and 19 % (Ruppert et al., 1999). A contribution (< 5 %) to the formaldehyde yield also probably results from the minor ozonolysis of the exocyclic C=C bond in limonene.

Products likely to be produced from alternative reactions of the Criegee intermediates have also been detected, for example the “secondary ozonide (SOZ)” (Nørgaard et al., 2013), which can potentially be formed from ring closure of either (I) or (II). Limononic acid (3-isopropenyl-6-oxo-heptanoic acid) has

been reported to be formed in very low yield from the ozonolysis of limonene under nominally dry conditions (Hammes et al., 2019). A systematic increase was observed in the presence of water vapour, consistent with its formation from the reaction of H<sub>2</sub>O with the (stabilized) *E*- conformer of Criegee intermediate (I). Limononaldehyde (3-isopropenyl-6-oxo-heptanal) has also been reported to be formed in low yield (between 0.4 % and 4 %) (Glasius et al., 2000; Clausen et al., 2001; Forester et al., 2009) under nominally dry conditions. Although no systematic investigations of the effect of water vapour on the yield have apparently been reported, limononaldehyde is also predicted to be formed (with H<sub>2</sub>O<sub>2</sub>) from reaction of H<sub>2</sub>O with the (stabilized) *E*- conformer of Criegee intermediate (I). Some support for this comes from the reported high yield ( $\approx$  33 %) of H<sub>2</sub>O<sub>2</sub> from limonene ozonolysis at close to 100 % relative humidity (Hewitt and Kok, 1991).

## References

- Aschmann, S. M., Arey, J. and Atkinson, R.: Atmos. Environ., 36, 4347, 2002.
- Atkinson, R. and Arey, J.: Chem. Rev., 103, 4605, 2003.
- Atkinson, R., Hasegawa, D. and Aschmann, S. M.: Int. J. Chem. Kinet., 22, 871, 1990.
- Atkinson, R., Aschmann, S. M., Arey, J. and Shorees, B.: J. Geophys. Res., 97, 6065, 1992.
- Bernard, F., Fedioun, I., Peyroux, F., Quilgars, A., Daële, V. and Mellouki, A.: J. Aerosol Sci., 43, 14, 2012.
- Calogirou, A., Jensen, N. R., Nielsen, C. J., Kotzias, D. and Hjorth, J.: Environ. Sci. Technol., 33, 453, 1999.
- Clausen, P. A., Wilkins, C. K., Wolkoff, P. and Nielsen, G. D: Environ. Int., 26, 511, 2001.
- Forester, C. D. and Wells, J. R.: Environ. Sci. Technol., 43, 3561, 2009.
- Forester, C. D. and Wells, J. R.: Indoor Air, 21, 400, 2011.
- Glasius, M., Lahaniati, M., Calogirou, A., Di Bella, D., Jensen, N. R., Hjorth, J., Kotzias, D. and Larsen, B. R.: Environ. Sci. Technol., 34, 1001, 2000.
- Grimsrud, E. P., Westberg, H. H. and Rasmussen, R. A.: Int. J. Chem. Kinet., Symp. 1, 183, 1975.
- Grosjean, D., Williams II, E. L., Grosjean, E., Andino, J. M. and Seinfeld, J. H.: Environ. Sci. Technol., 27, 2754, 1993.
- Hammes, J., Lutz, A., Mentel, T., Faxon, C., and Hallquist, M.: Atmos. Chem. Phys., 19, 13037, 2019.
- Herrmann, F., Winterhalter, R., Moortgat, G. K. and Williams, J.: Atmos. Environ., 44, 3458, 2010.
- Hewitt, C. N. and Kok, G. L.: J. Atmos. Chem., 12, 181, 1991.
- Khamaganov, V. G. and Hites, R. A.: J. Phys. Chem. A, 105, 815, 2001.
- Leungsakul, S., Jaoui, M. and Kamens, R. M.: Environ. Sci. Technol., 39, 9583, 2005.
- Newland, M. J., Rickard, A. R., Sherwen, T., Evans, M. J., Vereecken, L., Muñoz, A., Ródenas, M., and Bloss, W. J.: Atmos. Chem. Phys., 18, 6095, 2018.
- Nørgaard, A. W., Vibenholt, A., Benassi, M., Clausen, P.A., Wolkoff, P.: J. Am. Soc. Mass Spectrom., 24, 1090, 2013.
- Ruppert, L., Becker, K. H., Nozière, B. and Spittler, M.: In: Borrell, P.M., Borrell, P. (Eds.), Transport and Chemical Transformation in the Troposphere. Proceedings of the EUROTRAC-2 Symposium '98. WIT press, Southampton, UK, pp. 63–68.
- Shu, Y. and Atkinson, R.: Int. J. Chem. Kinet., 26, 1193, 1994.
- Sipilä, M., Jokinen, T., Berndt, T., Richters, S., Makkonen, R., Donahue, N. M., Mauldin III, R. L., Kurtén, T., Paasonen, P., Sarnela, N., Ehn, M., Junninen, H., Rissanen, M. P., Thornton, J., Stratmann, F., Herrmann, H., Worsnop, D. R., Kulmala, M., Kerminen, V.-M., and Petäjä, T.: Atmos. Chem. Phys., 14, 12143, 2014.
- Warscheid, B. and Hoffmann, T.: Rapid Commun. Mass Spectrom., 15, 2259, 2001.
- Witter, M., Berndt, T., Böge, O., Stratmann, F. and Heintzenberg, J.: Int. J. Chem. Kinet., 34, 394, 2002.
- Zhang, J., Wilson, W. E., and Liroy, P. J.: Environ. Sci. Technol., 28, 1975, 1994.

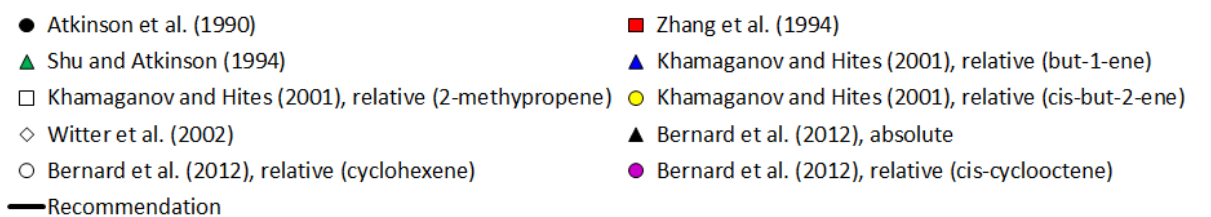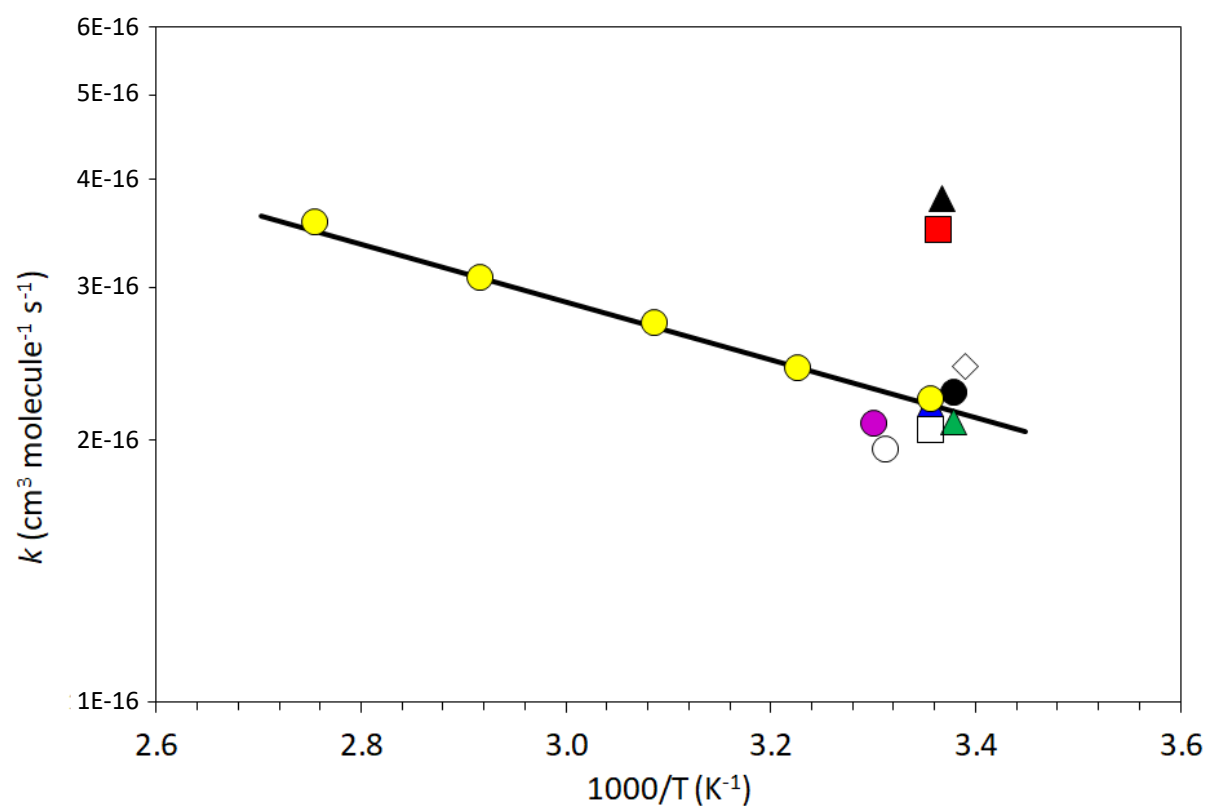

**Ox\_VOC21: camphene**

Last evaluated: August 2018; Last change in preferred values: August 2018

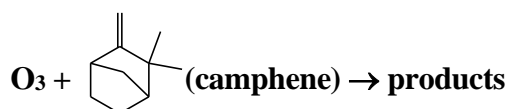**Rate coefficient data**

| $k/\text{cm}^3 \text{ molecule}^{-1} \text{ s}^{-1}$ | Temp./K     | Reference                 | Technique/Comments |
|------------------------------------------------------|-------------|---------------------------|--------------------|
| <i>Absolute Rate Coefficients</i>                    |             |                           |                    |
| $(9.0 \pm 1.7) \times 10^{-19}$                      | $296 \pm 2$ | Atkinson et al., 1990     | S-CL/GC (a)        |
| <i>Relative Rate Coefficients</i>                    |             |                           |                    |
| $(4.3 \pm 0.5) \times 10^{-19}$                      | $298 \pm 2$ | Johnson et al., 2000      | RR-GC (b)          |
| $(5.5 \pm 1.2) \times 10^{-19}$                      | $298 \pm 2$ | Gaona-Colmán et al., 2017 | RR-FTIR (c)        |
| $9.8 \times 10^{-18} \exp[(-859 \pm 53)/T]$          | 288-311     |                           |                    |

camphene is 2,2-dimethyl-3-methylene-bicyclo[2.2.1]heptane

**Comments**

- (a)  $k$  determined from the observed first-order rate of ozone decay (measured with a chemiluminescence analyzer) in the presence of known excess concentrations of camphene (measured by GC-FID). Experiments were carried out at a total pressure of 980 mbar in a 160 L Teflon chamber.  $k$  was corrected to account for the presence of a ~10 % monoterpene impurity of comparable ozone reactivity in the camphene sample, which was tentatively identified as the structurally-similar monoterpene,  $\alpha$ -fenchene.
- (b) The concentrations of camphene and ethene (the reference compound), with cyclohexane to scavenge HO radicals, were monitored by GC-FID in a 50 L collapsible Teflon chamber at 760 Torr (1013 mbar) pressure of purified air in the presence of  $\text{O}_3$ . The measured rate coefficient ratio  $k(\text{O}_3 + \text{camphene})/k(\text{O}_3 + \text{ethene})$  is placed on an absolute basis using  $k(\text{O}_3 + \text{ethene}) = 1.55 \times 10^{-18} \text{ cm}^3 \text{ molecule}^{-1} \text{ s}^{-1}$  at 298 K (IUPAC, current recommendation).
- (c) The concentrations of camphene and ethene or o-cresol (the reference compounds), with cyclohexane to scavenge HO radicals, were monitored by GC-FID in a 50 L collapsible Teflon chamber at 760 Torr (1013 mbar) pressure of purified air in the presence of  $\text{O}_3$ . Experiments performed at 298 K carried out using both ethene and o-cresol as reference compounds; with only ethene used at other temperatures. The measured rate coefficient ratios  $k(\text{O}_3 + \text{camphene})/k(\text{O}_3 + \text{ethene})$  and  $k(\text{O}_3 + \text{camphene})/k(\text{O}_3 + \text{o-cresol})$  are placed on an absolute basis using  $k(\text{O}_3 + \text{ethene}) = 6.82 \times 10^{-15} \exp(-2500/T) \text{ cm}^3 \text{ molecule}^{-1} \text{ s}^{-1}$  and  $k(\text{O}_3 + \text{o-cresol}) = 2.6 \times 10^{-19} \text{ cm}^3 \text{ molecule}^{-1} \text{ s}^{-1}$  at 298 K (IUPAC, current recommendations).

### Preferred Values

| Parameter                                              | Value                              | T/K     |
|--------------------------------------------------------|------------------------------------|---------|
| $k / \text{cm}^3 \text{ molecule}^{-1} \text{ s}^{-1}$ | $5.0 \times 10^{-19}$              | 298     |
| $k / \text{cm}^3 \text{ molecule}^{-1} \text{ s}^{-1}$ | $9.0 \times 10^{-18} \exp(-860/T)$ | 285-315 |
| <i>Reliability</i>                                     |                                    |         |
| $\Delta \log k$                                        | $\pm 0.30$                         | 298     |
| $\Delta E/R$                                           | $\pm 500$                          | 285-315 |

### Comments on Preferred Values

The preferred value of  $E/R$  is based on the sole temperature dependence study of Gaona-Colmán et al. (2017), which covered only a narrow temperature range. Confirmatory studies of the temperature dependence are required. The preferred 298 K rate coefficient is a rounded average of the relative rate determinations of Johnson et al. (2000) and Gaona-Colmán et al. (2017), which are in good agreement. The absolute determination of Atkinson et al. (1990) required correction for the presence of an impurity, but the reported value of  $k$  lies within the assigned uncertainty range in the preferred value.

The reaction proceeds by initial addition of  $\text{O}_3$  to the  $\text{C}=\text{C}$  bond to form a “primary ozonide (POZ)” which rapidly decomposes to form two sets of “primary” carbonyl product plus Criegee intermediate, as shown in the schematic below:

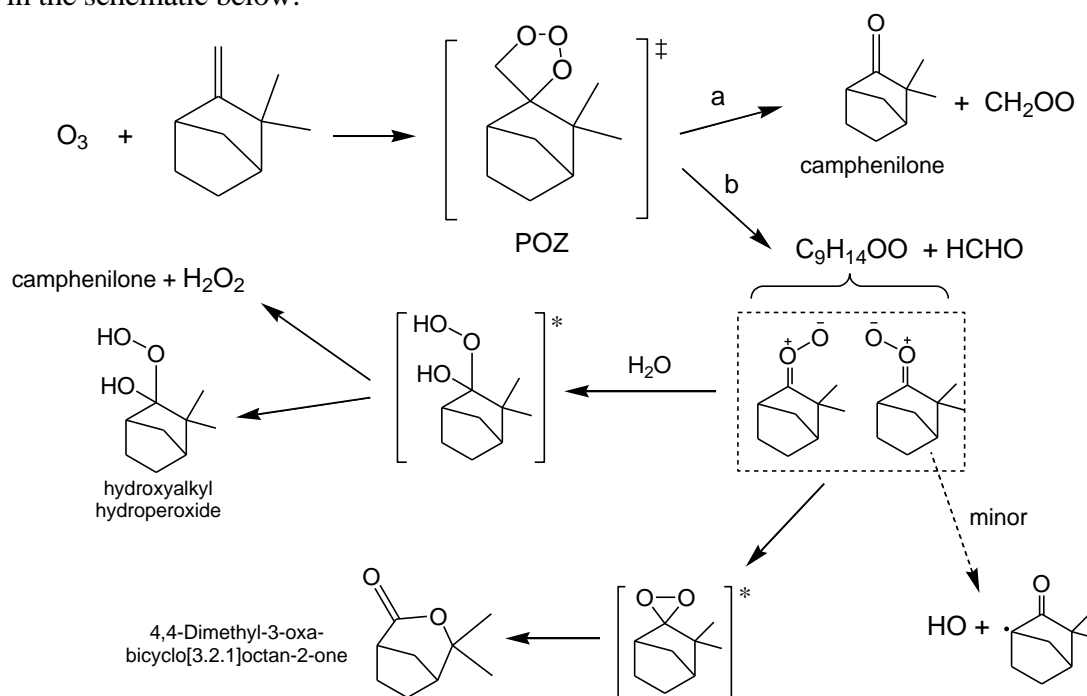

Camphenilone (3,3-dimethyl-bicyclo[2.2.1]heptan-2-one) is expected to be formed in conjunction with the Criegee intermediate  $\text{CH}_2\text{OO}$  (channel (a)), and has been reported as a significant product, formed with a yield of  $(36 \pm 6) \%$  (Hakola et al., 1994). Channel (b) is expected to form  $\text{HCHO}$  and the Criegee intermediate  $\text{C}_9\text{H}_{14}\text{OO}$ , although there have been no reported measurements of the yield of  $\text{HCHO}$ .

The Criegee intermediate,  $\text{CH}_2\text{OO}$  (formed from channel (a)), is expected to be almost fully stabilised at atmospheric pressure, by analogy with the  $\beta$ -pinene system (Nguyen et al., 2009). Based on reported kinetic data (summarised and evaluated in datasheets CGI\_1 to CGI\_12), the major fate of  $\text{CH}_2\text{OO}$  under tropospheric conditions is expected to be removal via bimolecular reactions, particularly



with (H<sub>2</sub>O)<sub>2</sub>. Partial stabilisation of the C<sub>9</sub> Criegee intermediate, C<sub>9</sub>H<sub>14</sub>OO (formed from channel (b)), has also been inferred by Hasson et al. (2001), based on scavenging with added H<sub>2</sub>O and observation of the corresponding products.

Atkinson et al. (1992) have reported an upper limit HO yield of  $\leq 18\%$  for the reaction of O<sub>3</sub> with camphene, indicating that HO formation from the decomposition of C<sub>9</sub>H<sub>14</sub>OO is also a minor route. The formation of HO via the accepted decomposition mechanism (involving abstraction of a  $\beta$ -hydrogen via a vinyl hydroperoxide intermediate) may be inhibited owing to the only  $\beta$ -hydrogen in C<sub>9</sub>H<sub>14</sub>OO being at the bridgehead of a constrained bicyclic structure, as discussed by Rickard et al. (1999) and Nguyen et al. (2009) for the structurally-similar isomeric Criegee intermediate formed from  $\beta$ -pinene ozonolysis. The alternative well-documented decomposition route, via a dioxirane intermediate (e.g. Johnson and Marston, 2008), leads to the formation of a lactone (4,4-dimethyl-3-oxa-bicyclo[3.2.1]octan-2-one), which has been reported to be a significant product (yield  $\approx 20\%$ ) by Hakola et al. (1994). If stabilized, C<sub>9</sub>H<sub>14</sub>OO may also potentially react with H<sub>2</sub>O under atmospheric conditions. Based on the results of Hasson et al. (2001), this leads mainly to formation of the hydroxyalkyl hydroperoxide shown in the schematic, with minor formation of camphenilone and H<sub>2</sub>O<sub>2</sub>.

## References

- Atkinson, R., Aschmann, S. M. and Arey, J.: Atmos. Environ., 24A, 2647, 1990.  
 Atkinson, R., Aschmann, S. M., Arey, J. and Shorees, B.: J. Geophys. Res., 97, 6065, 1992.  
 Gaona-Colmán, E., Blanco, M. B., Barnes, I., Wiesen, P. and Teruel, M. A.: RSC Adv., 7, 2733, 2017.  
 Hakola, H., Arey, J., Aschmann, S. M. and Atkinson, R.: J. Atmos. Chem., 18, 75, 1994.  
 Hasson, A. A., Ho, A. W., Kuwata, K. T. and Paulson, S. E.: J. Geophys. Res., 106, 34143, 2001.  
 Johnson, D. and Marston, G.: Chem. Soc. Rev., 37, 699, 2008.  
 Johnson, D., Rickard, A. R., McGill, C. D. and Marston, G.: Phys. Chem. Chem. Phys., 2, 323, 2000.  
 Nguyen, T. L., Peeters, J. and Vereecken, L.: Phys. Chem. Chem. Phys., 11, 5643, 2009.  
 Rickard, A. R., Johnson, D., McGill, C. D. and Marston, G.: J. Phys. Chem. A, 103, 7656, 1999.

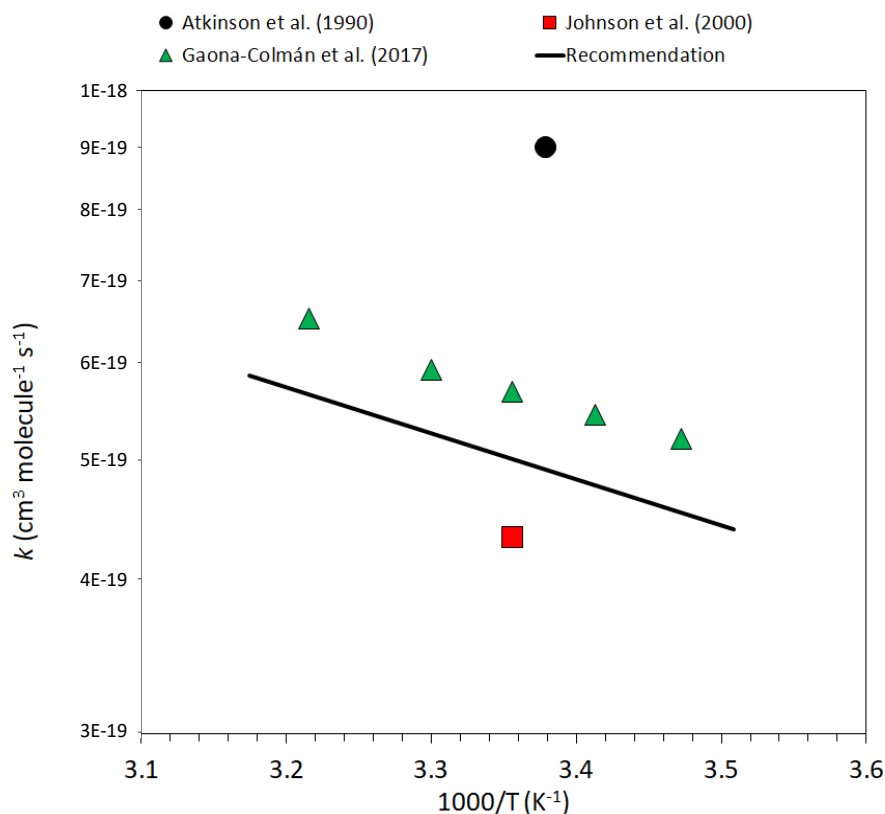

**Ox\_VOC22: 2-carene**

Last evaluated: August 2018; Last change in preferred values: September 2013

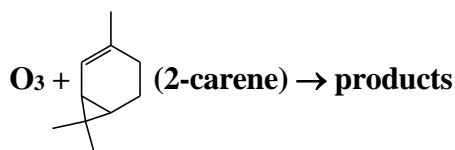**Rate coefficient data**

| $k/\text{cm}^3 \text{ molecule}^{-1} \text{ s}^{-1}$ | Temp./K     | Reference             | Technique/Comments |
|------------------------------------------------------|-------------|-----------------------|--------------------|
| <i>Absolute Rate Coefficients</i>                    |             |                       |                    |
| $(2.32 \pm 0.30) \times 10^{-16}$                    | $296 \pm 2$ | Atkinson et al., 1990 | S-CL/GC (a)        |
| <i>Relative Rate Coefficients</i>                    |             |                       |                    |
| $(2.56 \pm 0.27) \times 10^{-16}$                    | $296 \pm 2$ | Atkinson et al., 1990 | RR-GC (b)          |

2-carene is 3,7,7-trimethyl-bicyclo[4.1.0]hept-2-ene

**Comments**

- (a)  $k$  determined from the observed first-order rate of ozone decay (measured with a chemiluminescence analyzer) in the presence of known excess concentrations of 2-carene (measured by GC-FID). Experiments were carried out in a 160 L Teflon chamber.
- (b) The concentrations of a series of alkenes (including 2-carene and  $\alpha$ -pinene, the reference compound), with cyclohexane to scavenge HO radicals, were monitored by GC-FID in a 3600 L Teflon chamber at 740 Torr (990 mbar) pressure of purified air in the presence of  $\text{O}_3$ . The measured rate coefficient ratio  $k(\text{O}_3 + \text{2-carene})/k(\text{O}_3 + \alpha\text{-pinene})$  is placed on an absolute basis using  $k(\text{O}_3 + \alpha\text{-pinene}) = 9.46 \times 10^{-17} \text{ cm}^3 \text{ molecule}^{-1} \text{ s}^{-1}$  at 296 K (IUPAC, current recommendation).

**Preferred Values**

| Parameter                                              | Value                 | T/K |
|--------------------------------------------------------|-----------------------|-----|
| $k / \text{cm}^3 \text{ molecule}^{-1} \text{ s}^{-1}$ | $2.4 \times 10^{-16}$ | 298 |
| <i>Reliability</i>                                     |                       |     |
| $\Delta \log k$                                        | $\pm 0.20$            | 298 |

**Comments on Preferred Values**

The preferred value of the rate coefficient is the average of the absolute and relative rate coefficients reported by Atkinson et al. (1990), the only study of the kinetics of the reaction to date. Confirmatory studies are required.

There has been only limited product and mechanistic information reported in the literature. Based on general understanding of the reactions of ozone with alkenes and terpenes, the reaction is expected to proceed by initial addition of  $\text{O}_3$  to the C=C bond in 2-carene to form a “primary ozonide (POZ)” which rapidly decomposes, mainly to form two carbonyl-substituted Criegee intermediates ((I) and (II)), as represented in the following schematic:

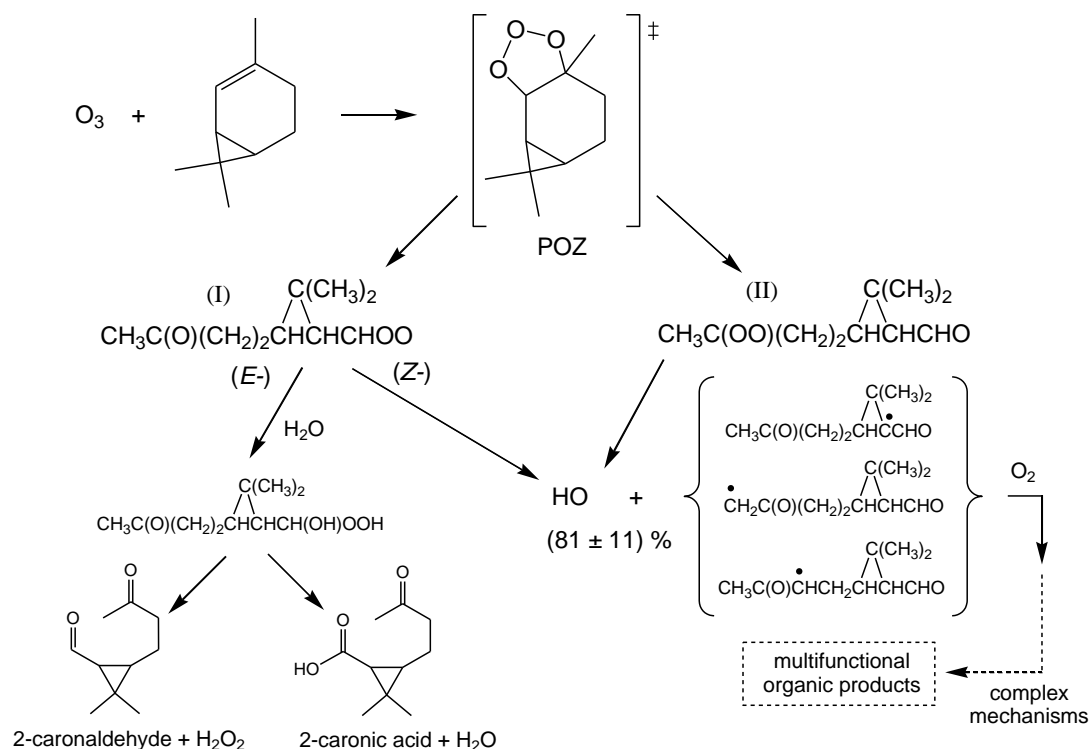

Based on the high reported yield of HO radicals, (81 ± 11 %) (Aschmann et al., 2002), it is likely that the Criegee intermediates mainly decompose to form HO radicals and a number of  $\beta$ -oxo alkyl radicals, as shown above. The further chemistry of the  $\beta$ -oxo alkyl radicals is expected to form a number of multifunctional organic products containing hydroxy, hydroperoxy, carbonyl and acid functionalities, but there have been no reported studies identifying organic products.

Formation of HO via the accepted decomposition mechanism (involving abstraction of a  $\beta$ -hydrogen via a vinyl hydroperoxide intermediate) is not possible for the *E*- conformer of Criegee Intermediate (I) (e.g. see Johnson and Marston, 2008). If stabilized, this is expected to react predominantly with  $\text{H}_2\text{O}$  under atmospheric conditions, leading to the formation of 2-caronaldehyde and  $\text{H}_2\text{O}_2$ , or 2-caronic acid. Some support for this comes from the significant yield ( $\approx 18$  %) of  $\text{H}_2\text{O}_2$  from 2-carene ozonolysis at close to 100 % relative humidity (Hewitt and Kok, 1991).

## References

- Aschmann, S. M., Arey, J. and Atkinson, R.: Atmos. Environ., 36, 4347, 2002.  
 Atkinson, R., Hasegawa, D. and Aschmann, S. M.: Int. J. Chem. Kinet., 22, 871, 1990.  
 Hewitt, C. N. and Kok, G. L.: J. Atmos. Chem., 12, 181, 1991.  
 Johnson, D. and Marston, G.: Chem. Soc. Rev., 37, 699, 2008.

**Ox\_VOC23: 3-carene**

Last evaluated: August 2018; Last change in preferred values: September 2013

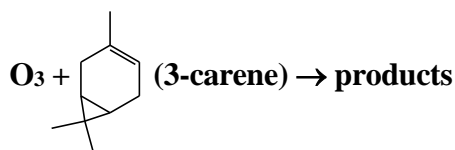**Rate coefficient data**

| $k/\text{cm}^3 \text{ molecule}^{-1} \text{ s}^{-1}$ | Temp./K       | Reference             | Technique/Comments |
|------------------------------------------------------|---------------|-----------------------|--------------------|
| <i>Absolute Rate Coefficients</i>                    |               |                       |                    |
| $1.2 \times 10^{-16}$                                | $295 \pm 1$   | Grimsrud et al., 1975 | F-CL               |
| $(5.20 \pm 0.56) \times 10^{-17}$                    | $296 \pm 2$   | Atkinson et al., 1990 | S-CL/GC (a)        |
| <i>Relative Rate Coefficients</i>                    |               |                       |                    |
| $(4.12 \pm 0.44) \times 10^{-17}$                    | $296 \pm 2$   | Atkinson et al., 1990 | RR-GC (b)          |
| $(5.60 \pm 0.95) \times 10^{-17}$                    | $295 \pm 0.5$ | Witter et al., 2002   | RR-GC (c)          |

3-carene is 3,7,7-trimethyl-bicyclo[4.1.0]hept-3-ene

**Comments**

- (a)  $k$  determined from the observed first-order rate of ozone decay (measured with a chemiluminescence analyzer) in the presence of known excess concentrations of 3-carene (measured by GC-FID). Experiments were carried out in a 160 L Teflon chamber. The presence of impurities in the 3-carene sample (3 % of sabinene and/or  $\beta$ -pinene and 2.9 % of limonene) was reported, such that the measured value of  $k$  was believed to be overestimated by up to about 20 %.
- (b) The concentrations of a series of alkenes (including 3-carene and  $\alpha$ -pinene, the reference compound), with cyclohexane to scavenge HO radicals, were monitored by GC-FID in a 3600 L Teflon chamber at 740 Torr (990 mbar) pressure of purified air in the presence of  $\text{O}_3$ . The measured rate coefficient ratio  $k(\text{O}_3 + 3\text{-carene})/k(\text{O}_3 + \alpha\text{-pinene})$  is placed on an absolute basis using  $k(\text{O}_3 + \alpha\text{-pinene}) = 9.46 \times 10^{-17} \text{ cm}^3 \text{ molecule}^{-1} \text{ s}^{-1}$  at 296 K (IUPAC, current recommendation).
- (c) The concentrations of 3-carene and 2-methylbut-2-ene (the reference compound) were monitored by GC in reacting  $\text{O}_3$  - 3-carene - 2-methylbut-2-ene -  $m$ -xylene (the HO radical scavenger) - air mixtures in a flow system at 100 mbar pressure. The measured rate coefficient ratio of  $k(\text{O}_3 + 3\text{-carene})/k(\text{O}_3 + 2\text{-methylbut-2-ene}) = 0.143 \pm 0.018$  is placed on an absolute basis using a rate coefficient at 295 K of  $k(\text{O}_3 + 2\text{-methylbut-2-ene}) = 3.92 \times 10^{-16} \text{ cm}^3 \text{ molecule}^{-1} \text{ s}^{-1}$  (Atkinson and Arey, 2003).

**Preferred Values**

| Parameter                                            | Value                 | T/K |
|------------------------------------------------------|-----------------------|-----|
| $k/\text{cm}^3 \text{ molecule}^{-1} \text{ s}^{-1}$ | $4.9 \times 10^{-17}$ | 298 |
| <i>Reliability</i>                                   |                       |     |
| $\Delta \log k$                                      | $\pm 0.20$            | 298 |

### Comments on Preferred Values

The preferred value of the rate coefficient at 298 K is an average of the relative rate coefficient determinations of Atkinson et al. (1990) and Witter et al. (2002), which are in agreement to within their combined uncertainty limits. The absolute rate coefficient determination of Atkinson et al. (1990) was reported to be potentially influenced by the presence of reactive impurities in the 3-carene sample (see comment (b)), and is therefore not included in the average; although it is consistent with the preferred value of  $k$ . The earlier absolute rate coefficient determinations reported by Grimsrud et al. (1975) for 3-carene, and also for several other terpenes, appear to be systematically high.

The reaction proceeds by initial addition of  $O_3$  to the C=C bond in 3-carene to form a “primary ozonide (POZ)” which rapidly decomposes, mainly to form two carbonyl-substituted Criegee intermediates (I) and (II), as represented in the following schematic:

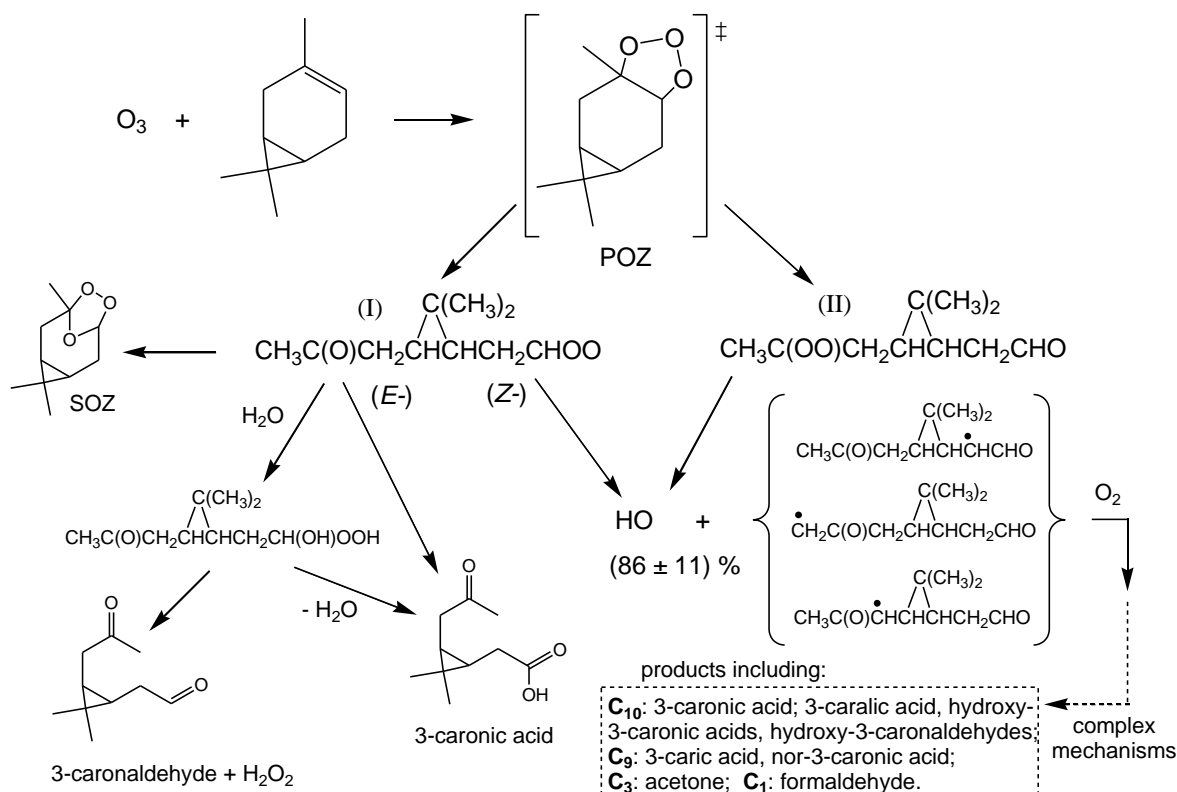

The Criegee intermediates mainly decompose to form HO radicals, which are expected to be formed in conjunction with a number of  $\beta$ -oxo alkyl radicals. A yield of HO radical yields of (86 ± 11) % has been reported by Aschmann et al. (2002). The further chemistry of the  $\beta$ -oxo alkyl radicals may form a number of reported multifunctional organic products containing hydroxy, carbonyl and acid functionalities (Yu et al., 1999; Glasius et al., 2000; Warscheid and Hoffmann, 2001; Ma et al., 2009); and also acetone and formaldehyde, which have been reported to be formed with respective yields of (14  $^{+8}_{-4}$ ) % (Reissel et al., 1999; Orlando et al., 2000; Lee et al., 2006) and (25 ± 2) % (Lee et al., 2006).

Products likely to be produced from alternative reactions of the Criegee intermediates have also been detected, for example the secondary ozonide (SOZ) (Vibenholt et al., 2009), which can potentially be formed from ring closure of either (I) or (II). 3-caronaldehyde has been reported to be formed with total yields in the range (8.5 – 25) % under nominally dry conditions (Yu et al., 1999; Ma et al., 2009), with Ma et al. (2009) reporting an increasing yield with increasing relative humidity. 3-caronaldehyde is therefore likely to be formed with  $H_2O_2$  from the reaction of  $H_2O$  with the (stabilized) *E*- conformer of

Criegee intermediate (I), which would also be predicted to be its dominant reaction under atmospheric conditions.

### References

- Aschmann, S. M., Arey, J. and Atkinson, R.: Atmos. Environ., 36, 4347, 2002.
- Atkinson, R., Hasegawa, D. and Aschmann, S. M.: Int. J. Chem. Kinet., 22, 871, 1990.
- Atkinson, R. and Arey, J.: Chem. Rev., 103, 4605, 2003.
- Glasius, M., Lahaniati, M., Calogirou, A., Di Bella, D., Jensen, N. R., Hjorth, J., Kotzias, D. and Larsen, B. R.: Environ. Sci. Technol., 34, 1001, 2000.
- Grimsrud, E. P., Westberg, H. H. and Rasmussen, R. A.: Int. J. Chem. Kinet., Symp. 1, 183, 1975.
- Lee, A., Goldstein, A. H., Keywood, M. D., Gao, S., Varutbangkul, V., Bahreini, R., Ng, N. L., Flagan, R. C., and Seinfeld, J. H.: J. Geophys. Res., 111, D07302, doi:10.1029/2005JD006437, 2006.
- Ma, Y., Porter, R. A., Chappell, D., Russell, A. T. and Marston, G.: Phys. Chem. Chem. Phys., 11, 4184, 2009.
- Orlando, J. J., Nozière, B., Tyndall, G. S., Orzechowska, G. E., Paulson, S. E. and Rudich, Y.: J. Geophys. Res., 105, 11561, 2000.
- Reissell, A., Harry, C., Aschmann, S. M., Atkinson, R. and Arey, J.: J. Geophys. Res., 104, 13869, 1999.
- Vibenholt, A., Nørsgaard, A. W., Clausen, P. A. and Wolkoff, P.: Chemosphere, 76, 572, 2009.
- Warscheid, B. and Hoffmann, T.: Rapid Commun. Mass Spectrom., 15, 2259, 2001.
- Witter, M., Berndt, T., Böge, O., Stratmann, F. and Heintzenberg, J.: Int. J. Chem. Kinet., 34, 394, 2002.
- Yu, J., Cocker III, D. R., Griffin, R. J., Flagan, R. C., Seinfeld, J. H.: J. Atmos. Chem., 34, 207, 1999.

**Ox\_VOC24:  $\beta$ -myrcene**

Last evaluated: August 2020; Last change in preferred values: August 2018

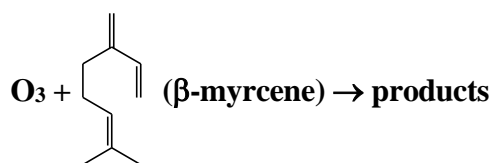**Rate coefficient data**

| $k/\text{cm}^3 \text{ molecule}^{-1} \text{ s}^{-1}$ | Temp./K     | Reference             | Technique/Comments |
|------------------------------------------------------|-------------|-----------------------|--------------------|
| <i>Absolute Rate Coefficients</i>                    |             |                       |                    |
| $1.25 \times 10^{-15}$                               | $295 \pm 1$ | Grimsrud et al., 1975 | F-CL               |
| $(5.7 \pm 1.6) \times 10^{-16}$                      | $298 \pm 1$ | Bernard et al., 2012  | F-CL (a)           |
| <i>Relative Rate Coefficients</i>                    |             |                       |                    |
| $(5.01 \pm 0.81) \times 10^{-16}$                    | $296 \pm 2$ | Atkinson et al., 1990 | RR-GC (b)          |
| $(4.59 \pm 0.57) \times 10^{-16}$                    | $296 \pm 2$ | Witter et al., 2002   | RR-GC (c)          |
| $2.33 \times 10^{-15} \exp[-(521 \pm 109/T)]$        | 298-318     | Kim et al., 2011      | RR-MS (d)          |
| $(4.05^{+0.31}_{-0.29}) \times 10^{-16}$             | 298         |                       |                    |
| $(4.90 \pm 0.69) \times 10^{-16}$                    | $303 \pm 1$ | Bernard et al., 2012  | RR-IR (e,f)        |
| $(3.82 \pm 0.38) \times 10^{-16}$                    | $304 \pm 1$ |                       | RR-IR (e,g)        |

myrcene is 7-methyl-3-methylene-octa-1,6-diene

**Comments**

- (a)  $k$  determined from the observed first-order rate of ozone decay (measured with a chemiluminescence analyzer) in the presence of known excess concentrations of  $\beta$ -myrcene, in a flow reactor at a total pressure of  $\sim 1$  bar.
- (b) The concentrations of a series of alkenes (including  $\beta$ -myrcene and limonene, the reference compound), with cyclohexane to scavenge HO radicals, were monitored by GC-FID in a 3600 L Teflon chamber at 740 Torr (990 mbar) pressure of purified air in the presence of  $\text{O}_3$ . The measured rate coefficient ratio  $k(\text{O}_3 + \beta\text{-myrcene})/k(\text{O}_3 + \text{limonene})$  is placed on an absolute basis using  $k(\text{O}_3 + \text{limonene}) = 2.16 \times 10^{-16} \text{ cm}^3 \text{ molecule}^{-1} \text{ s}^{-1}$  at 296 K (IUPAC, current recommendation).
- (c) The concentrations of  $\beta$ -myrcene and 2-methyl-but-2-ene (the reference compound) were monitored by GC in reacting  $\text{O}_3$  -  $\beta$ -myrcene - 2-methyl-but-2-ene - *m*-xylene (the HO radical scavenger) - air mixtures in a flow system at 100 mbar pressure. The measured rate coefficient ratio  $k(\text{O}_3 + \beta\text{-myrcene})/k(\text{O}_3 + 2\text{-methyl-but-2-ene}) = 1.17 \pm 0.06$  is placed on an absolute basis using  $k(\text{O}_3 + 2\text{-methyl-but-2-ene}) = 3.92 \times 10^{-16} \text{ cm}^3 \text{ molecule}^{-1} \text{ s}^{-1}$  at 295 K (Atkinson and Arey, 2003).
- (d) The concentrations of  $\beta$ -myrcene and *trans*-but-2-ene (the reference compound) were monitored by MS in reacting  $\text{O}_3$  -  $\beta$ -myrcene - *trans*-but-2-ene - acetaldehyde - He mixtures in a 160  $\text{cm}^3$  volume quartz vessel at  $\sim 1$  bar pressure, with acetaldehyde being present to scavenge HO radicals. The measured rate coefficient ratios  $k(\text{O}_3 + \beta\text{-myrcene})/k(\text{O}_3 + \text{trans-but-2-ene})$  are placed on an absolute basis using  $k(\text{O}_3 + \text{trans-but-2-ene}) = 7.0 \times 10^{-15} \exp(-1060/T) \text{ cm}^3 \text{ molecule}^{-1} \text{ s}^{-1}$  (IUPAC, current recommendation).
- (e) The concentrations of  $\beta$ -myrcene and cyclohexene or *cis*-cyclooctene (the reference compounds) were monitored by FT-IR in reacting  $\text{O}_3$  - myrcene - reference compound - cyclohexane (HO radical

scavenger) - air mixtures in a 7300 L Teflon chamber at ~1 bar pressure. The measured rate coefficient ratios,  $k(\text{O}_3 + \beta\text{-myrcene})/k(\text{O}_3 + \text{cyclohexene}) = 5.7 \pm 0.8$  and  $k(\text{O}_3 + \beta\text{-myrcene})/k(\text{O}_3 + \text{cis-cyclooctene}) = 1.0 \pm 0.1$ , are placed on an absolute basis using  $k(\text{O}_3 + \text{cyclohexene}) = 8.60 \times 10^{-17} \text{ cm}^3 \text{ molecule}^{-1} \text{ s}^{-1}$  at 303 K and  $k(\text{O}_3 + \text{cis-cyclooctene}) = 3.82 \times 10^{-16} \text{ cm}^3 \text{ molecule}^{-1} \text{ s}^{-1}$  at 304 K (Atkinson and Arey, 2003).

(f) Relative to  $k(\text{O}_3 + \text{cyclohexene})$ .

(g) Relative to  $k(\text{O}_3 + \text{cis-cyclooctene})$ .

### Preferred Values

| Parameter                                              | Value                               | T/K     |
|--------------------------------------------------------|-------------------------------------|---------|
| $k / \text{cm}^3 \text{ molecule}^{-1} \text{ s}^{-1}$ | $4.7 \times 10^{-16}$               | 298     |
| $k / \text{cm}^3 \text{ molecule}^{-1} \text{ s}^{-1}$ | $2.69 \times 10^{-15} \exp(-520/T)$ | 290-320 |
| <i>Reliability</i>                                     |                                     |         |
| $\Delta \log k$                                        | $\pm 0.2$                           | 298     |
| $\Delta E/R$                                           | $\pm 300$                           | 290-320 |

### Comments on Preferred Values

The preferred value of  $E/R$  is based on the sole temperature dependence study of Kim et al. (2011). The preferred 298 K rate coefficient is an average of those of Atkinson et al. (1990), Witter et al. (2002), Kim et al. (2011) and Bernard et al. (2012), corrected to 298 K where necessary using the preferred temperature dependence. The pre-exponential factor is adjusted to fit the 298 K preferred value. The earlier absolute rate coefficient determinations reported by Grimsrud et al. (1975) for  $\beta$ -myrcene, and also for several other terpenes, appear to be systematically high.

The reaction may proceed by initial addition of  $\text{O}_3$  to any of the three C=C bonds in  $\beta$ -myrcene. Comparison of  $k$  for the reaction of  $\text{O}_3$  with  $\beta$ -myrcene with that reported for the reaction of  $\text{O}_3$  with the  $\beta$ -myrcene oxidation product 4-methylene-hex-5-enal, which retains the two conjugated terminal C=C bonds (Baker et al., 2004), suggests that the reaction of  $\text{O}_3$  with  $\beta$ -myrcene occurs predominantly ( $\approx 97\%$ ) at the internal C=C bond; and this is largely supported by the observed product distribution and yields in reported product studies.

The addition of  $\text{O}_3$  to the internal C=C bond in  $\beta$ -myrcene forms a “primary ozonide (POZ)” which rapidly decomposes to form two sets of “primary” carbonyl product plus Criegee intermediate, as shown in the schematic below. Acetone has been reported to be formed with a yield of  $(25 \pm 4)\%$  (Reissell et al., 1999; 2002; Ruppert et al., 1999; Orlando et al., 2000; Newland et al., 2020), and 4-methylene-hex-5-enal with a yield of  $(70 \pm 13)\%$  (Reissell et al., 2002). This suggests important contributions from both decomposition channels, (a) and (b), as shown in the schematic, but with the dominance of channel (a) being consistent with that typically observed for primary ozonides formed from alkenes of generic structure  $\text{R}_1(\text{R}_2)\text{C}=\text{CHR}_3$  (Rickard et al., 1999).



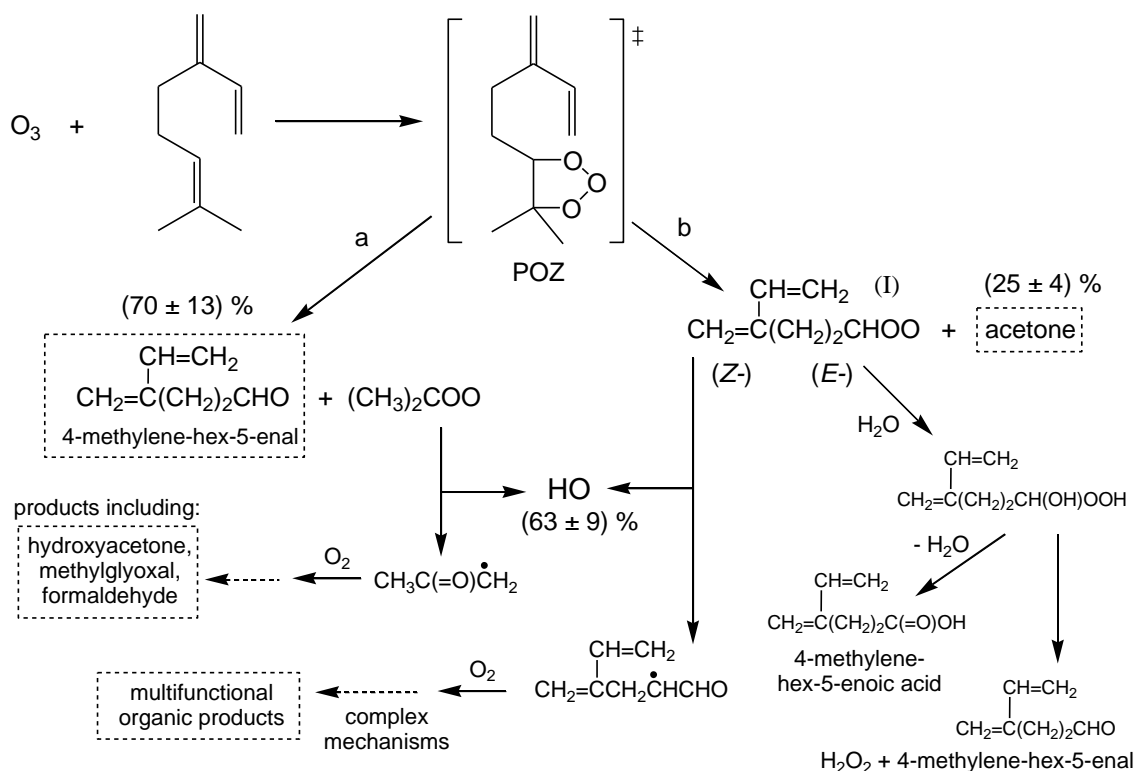

The Criegee intermediates are only partially stabilized under atmospheric conditions, with a preferred stabilized Criegee intermediate (sCI) yield of  $0.46 \pm 0.15$  recommended at atmospheric pressure, based on the determination Newland et al. (2020). The dimethyl-substituted Criegee intermediate (CH<sub>3</sub>)<sub>2</sub>COO (whether excited or stabilized) decomposes almost exclusively to form HO radicals and the acetyl radical (see discussion in data sheet Ox\_VOC41), the further chemistry of which leads to the formation of a number of products, including hydroxyacetone and formaldehyde. These products have been reported to be formed with respective yields of 19 % (Ruppert et al., 1999) and (26 – 51) % (Ruppert et al., 1999; Lee et al., 2006) from the ozonolysis of  $\beta$ -myrcene. A contribution (< 3 %) to the formaldehyde yield also probably results from the minor ozonolysis of the terminal C=C bonds in  $\beta$ -myrcene. HO radicals have been reported to be formed with a yield of (63 ± 9) % (Aschmann et al., 2002).

The Z- conformer of Criegee intermediate (I), formed in channel (b), may also decompose to form HO radicals and the  $\beta$ -oxo-dienyl radical shown in the schematic. HO formation via the accepted decomposition mechanism (involving abstraction of a  $\beta$ -hydrogen via a vinyl hydroperoxide intermediate) is unavailable for the E- conformer. If stabilized, this is likely to react predominantly with H<sub>2</sub>O under atmospheric conditions, potentially forming additional 4-methylene-hex-5-enal and H<sub>2</sub>O<sub>2</sub>, or 4-methylene-hex-5-enoic acid, as shown in the schematic.

## References

- Aschmann, S. M., Arey, J. and Atkinson, R.: Atmos. Environ., 36, 4347, 2002.
- Atkinson, R., Hasegawa, D. and Aschmann, S. M.: Int. J. Chem. Kinet., 22, 871, 1990.
- Atkinson, R. and Arey, J.: Chem. Rev., 103, 4605, 2003.
- Baker, J., Arey, J. and Atkinson, R.: J. Atmos. Chem., 48, 241, 2004.
- Bernard, F., Fedioun, I., Peyroux, F., Quilgars, A., Daële, V. and Mellouki, A.: J. Aerosol Sci., 43, 14, 2012.
- Grimsrud, E. P., Westberg, H. H. and Rasmussen, R. A.: Int. J. Chem. Kinet., Symp. 1, 183, 1975.
- Kim, D., Stevens, P. S. and Hites, R. A.: J. Phys. Chem. A, 115, 500, 2011.

Lee, A., Goldstein, A. H., Keywood, M. D., Gao, S., Varutbangkul, V., Bahreini, R., Ng, N. L., Flagan, R. C., and Seinfeld, J. H.: J. Geophys. Res., 111, D07302, doi:10.1029/2005JD006437, 2006.

Newland, M. J., Nelson, B. S., Muñoz, A., Ródenas, M., Vera, T., Tárrega, J., and Rickard, A. R.: Phys. Chem. Chem. Phys., 22, 13698, 2020.

Orlando, J. J., Noziere, B., Tyndall, G. S., Orzechowska, G. E., Paulson, S. E. and Rudich, Y.: J. Geophys. Res., 105(D9), 11,561, 2000.

Reissell, A., Harry, C., Aschmann, S. M., Atkinson, R. and Arey, J.: J. Geophys. Res., 104, 13869, 1999.

Reissell, A., Aschmann, S.M., Atkinson, R. and Arey, J.: J. Geophys. Res., 107 (D12), 4138, doi:10.1029/2001JD001234, 2002.

Rickard, A. R., Johnson, D., McGill, C. D. and Marston, G.: J. Phys. Chem. A, 103, 7656, 1999.

Witter, M., Berndt, T., Böge, O., Stratmann, F. and Heintzenberg, J.: Int. J. Chem. Kinet., 34, 394, 2002.

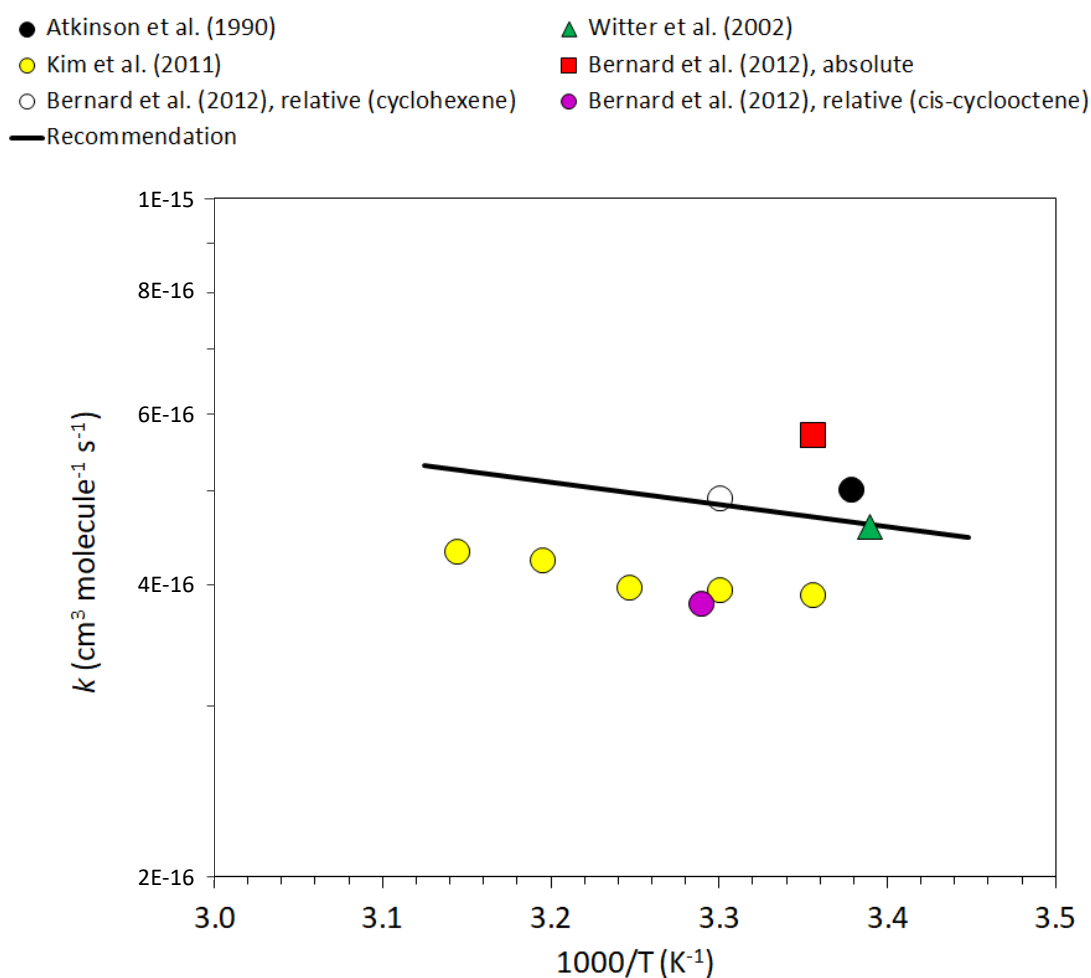

**Ox\_VOC25:  $\beta$ -ocimene**

Last evaluated: August 2018; Last change in preferred values: August 2018

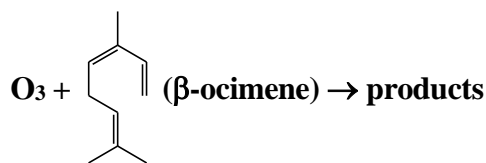**Rate coefficient data**

| $k/\text{cm}^3 \text{ molecule}^{-1} \text{ s}^{-1}$ | Temp./K     | Reference             | Technique/Comments |
|------------------------------------------------------|-------------|-----------------------|--------------------|
| <i>Absolute Rate Coefficients</i>                    |             |                       |                    |
| $2.0 \times 10^{-15}$                                | $295 \pm 1$ | Grimsrud et al., 1975 | F-CL               |
| <i>Relative Rate Coefficients</i>                    |             |                       |                    |
| $(5.75 \pm 0.88) \times 10^{-16}$                    | $296 \pm 2$ | Atkinson et al., 1990 | RR-GC (a)          |
| $(5.29 \pm 0.77) \times 10^{-16}$                    | $296 \pm 2$ | Witter et al., 2002   | RR-GC (b)          |
| $3.32 \times 10^{-15} \exp[-(627 \pm 110/T)]$        | 298-318     | Kim et al., 2011      | RR-MS (c)          |
| $(4.05^{+0.32}_{-0.30}) \times 10^{-16}$             | 298         |                       |                    |

ocimene is 3,7-dimethyl-octa-1,3,6-triene

**Comments**

- (a) The concentrations of a series of alkenes (including *trans*- $\beta$ -ocimene and limonene, the reference compound), with cyclohexane to scavenge HO radicals, were monitored by GC-FID in a 3600 L Teflon chamber at 740 Torr (990 mbar) pressure of purified air in the presence of  $\text{O}_3$ . The measured rate coefficient ratio  $k(\text{O}_3 + \textit{trans}\text{-}\beta\text{-ocimene})/k(\text{O}_3 + \textit{limonene})$  is placed on an absolute basis using  $k(\text{O}_3 + \textit{limonene}) = 2.16 \times 10^{-16} \text{ cm}^3 \text{ molecule}^{-1} \text{ s}^{-1}$  at 296 K (IUPAC, current recommendation).
- (b) The concentrations of *trans*- $\beta$ -ocimene and 2-methyl-but-2-ene (the reference compound) were monitored by GC in reacting  $\text{O}_3$  - *trans*- $\beta$ -ocimene - 2-methyl-but-2-ene - *m*-xylene (the HO radical scavenger) - air mixtures in a flow system at 100 mbar pressure. The measured rate coefficient ratio  $k(\text{O}_3 + \textit{trans}\text{-}\beta\text{-ocimene})/k(\text{O}_3 + \textit{2-methyl-but-2-ene}) = 1.35 \pm 0.08$  is placed on an absolute basis using  $k(\text{O}_3 + \textit{2-methyl-but-2-ene}) = 3.92 \times 10^{-16} \text{ cm}^3 \text{ molecule}^{-1} \text{ s}^{-1}$  at 295 K (Atkinson and Arey, 2003).
- (c) The concentrations of  $\beta$ -ocimene and *trans*-but-2-ene (the reference compound) were monitored by MS in reacting  $\text{O}_3$  -  $\beta$ -ocimene - *trans*-but-2-ene - acetaldehyde - He mixtures in a 160  $\text{cm}^3$  volume quartz vessel at  $\sim 1$  bar pressure, with acetaldehyde being present to scavenge HO radicals. The measured rate coefficient ratios  $k(\text{O}_3 + \beta\text{-ocimene})/k(\text{O}_3 + \textit{trans}\text{-but-2-ene})$  are placed on an absolute basis using  $k(\text{O}_3 + \textit{trans}\text{-but-2-ene}) = 7.0 \times 10^{-15} \exp(-1060/T) \text{ cm}^3 \text{ molecule}^{-1} \text{ s}^{-1}$  (IUPAC, current recommendation).

## Preferred Values

| Parameter                                              | Value                               | T/K     |
|--------------------------------------------------------|-------------------------------------|---------|
| $k / \text{cm}^3 \text{ molecule}^{-1} \text{ s}^{-1}$ | $5.1 \times 10^{-16}$               | 298     |
| $k / \text{cm}^3 \text{ molecule}^{-1} \text{ s}^{-1}$ | $4.15 \times 10^{-15} \exp(-625/T)$ | 290-320 |
| <i>Reliability</i>                                     |                                     |         |
| $\Delta \log k$                                        | $\pm 0.2$                           | 298     |
| $\Delta E/R$                                           | $\pm 300$                           | 290-320 |

### Comments on Preferred Values

The preferred value of  $E/R$  is based on the sole temperature dependence study of Kim et al. (2011). The preferred 298 K rate coefficient is an average of those of Atkinson et al. (1990), Witter et al. (2002) and Kim et al. (2011), corrected to 298 K where necessary using the preferred temperature dependence. The pre-exponential factor is adjusted to fit the 298 K preferred value. The earlier absolute rate coefficient determinations reported by Grimsrud et al. (1975) for  $\beta$ -ocimene, and also for several other terpenes, appear to be systematically high

The reaction may proceed by initial addition of  $\text{O}_3$  to any of the three  $\text{C}=\text{C}$  bonds in  $\beta$ -ocimene. Comparison of  $k$  for the reaction of  $\text{O}_3$  with  $\beta$ -ocimene with that reported for the reaction of  $\text{O}_3$  with the  $\beta$ -ocimene oxidation product 4-methyl-hexa-3,5-dienal, which retains the conjugated diene structure (Baker et al., 2004), suggests that the reaction of  $\text{O}_3$  with  $\beta$ -ocimene occurs predominantly ( $\approx 90\%$ ) at the isolated  $\text{C}=\text{C}$  bond.

The addition of  $\text{O}_3$  to the isolated  $\text{C}=\text{C}$  bond in  $\beta$ -ocimene forms a “primary ozonide (POZ)” which rapidly decomposes to form two sets of “primary” carbonyl product plus Criegee intermediate, as shown in the following schematic:

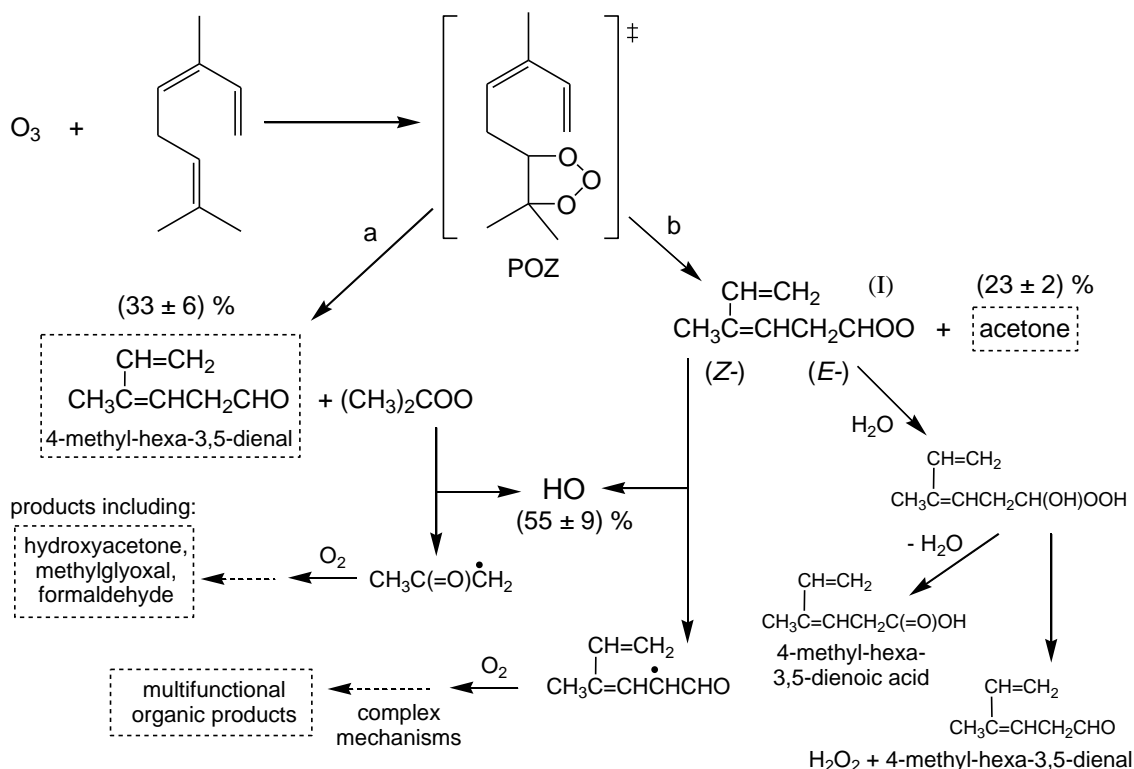

Acetone has been reported to be formed with a yield of  $(23 \pm 2)$  % (Reissell et al., 1999; 2002), and 4-methyl-hexa-3,5-dienal with a yield of  $(33 \pm 6)$  % (Reissell et al., 2002). This suggests important contributions from both decomposition channels, (a) and (b), as shown in the schematic, but with other unidentified pathways also contributing. These are partly accounted for by the products potentially formed from addition of  $O_3$  to the C=C bonds in the conjugated diene system, which are not represented in the schematic (and for which there are no reported yields).

The dimethyl-substituted Criegee intermediate  $(CH_3)_2COO$  decomposes almost exclusively to form HO radicals and the acetyl radical (see discussion in data sheet Ox\_VOC41), the further chemistry of which potentially leads to the formation of a number of products, e.g. hydroxyacetone, methylglyoxal and formaldehyde. HO radicals have been reported to be formed with a yield of  $(55 \pm 9)$  % from the reaction of  $O_3$  with  $\beta$ -ocimene (Aschmann et al., 2002).

The *Z*- conformer of Criegee intermediate (I), formed in channel (b), may also decompose to form HO radicals and the  $\beta$ -oxo-dienyl radical shown in the schematic. HO formation via the accepted decomposition mechanism (involving abstraction of a  $\beta$ -hydrogen via a vinyl hydroperoxide intermediate) is unavailable for the *E*- conformer. If stabilized, this is likely to react predominantly with  $H_2O$  under atmospheric conditions, potentially forming additional 4-methyl-hexa-3,5-dienal and  $H_2O_2$ , or 4-methyl-hexa-3,5-dienoic acid.

## References

- Aschmann, S. M., Arey, J. and Atkinson, R.: Atmos. Environ., 36, 4347, 2002.  
Atkinson, R., Hasegawa, D. and Aschmann, S. M.: Int. J. Chem. Kinet., 22, 871, 1990.  
Atkinson, R. and Arey, J.: Chem. Rev., 103, 4605, 2003.  
Baker, J., Arey, J. and Atkinson, R.: J. Atmos. Chem., 48, 241, 2004.  
Grimsrud, E. P., Westberg, H. H. and Rasmussen, R. A.: Int. J. Chem. Kinet., Symp. 1, 183, 1975.  
Kim, D., Stevens, P. S. and Hites, R. A.: J. Phys. Chem. A, 115, 500, 2011.  
Reissell, A., Harry, C., Aschmann, S. M., Atkinson, R. and Arey, J.: J. Geophys. Res., 104, 13869, 1999.  
Reissell, A., Aschmann, S.M., Atkinson, R. and Arey, J.: J. Geophys. Res., 107 (D12), 4138, doi:10.1029/2001JD001234, 2002.  
Witter, M., Berndt, T., Böge, O., Stratmann, F. and Heintzenberg, J.: Int. J. Chem. Kinet., 34, 394, 2002.

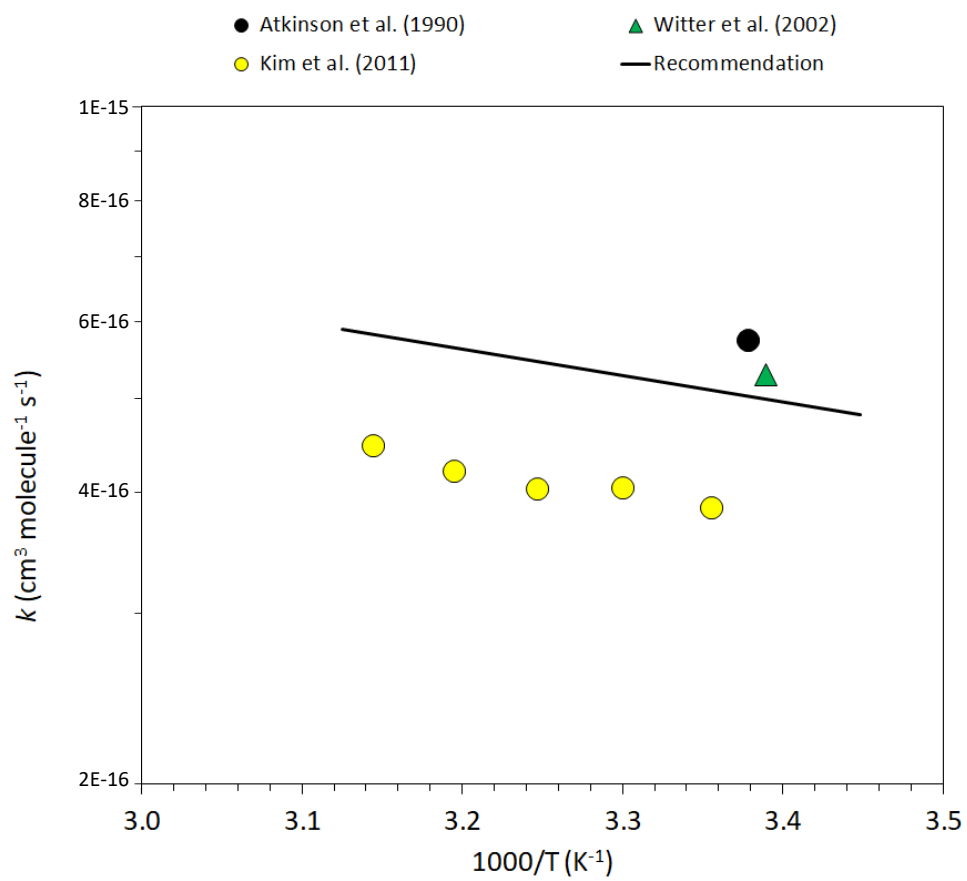

**Ox\_VOC26:  $\alpha$ -phellandrene**

Last evaluated: August 2020; Last change in preferred values: August 2018

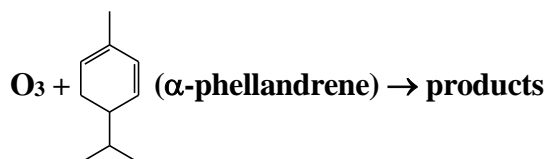**Rate coefficient data**

| $k/\text{cm}^3 \text{ molecule}^{-1} \text{ s}^{-1}$ | Temp./K     | Reference              | Technique/Comments |
|------------------------------------------------------|-------------|------------------------|--------------------|
| <i>Absolute Rate Coefficients</i>                    |             |                        |                    |
| $1.2 \times 10^{-14}$                                | $295 \pm 1$ | Grimsrud et al., 1975  | F-CL               |
| <i>Relative Rate Coefficients</i>                    |             |                        |                    |
| $(2.14 \pm 0.48) \times 10^{-15}$                    | $296 \pm 2$ | Atkinson et al., 1990  | RR-GC (a)          |
| $(2.90 \pm 0.09) \times 10^{-15}$                    | $296 \pm 2$ | Shu and Atkinson, 1994 | RR-GC (b)          |

 $\alpha$ -phellandrene is 2-methyl-5-(1-methylethyl)-1,3-cyclohexadiene**Comments**

- (a) The concentrations of a series of alkenes (including  $\alpha$ -phellandrene and terpinolene, the reference compound), with cyclohexane to scavenge HO radicals, were monitored by GC-FID in a 3600 L Teflon chamber at 740 Torr (990 mbar) pressure of purified air in the presence of  $\text{O}_3$ . The measured rate coefficient ratio  $k(\text{O}_3 + \alpha\text{-phellandrene})/k(\text{O}_3 + \text{terpinolene})$  is placed on an absolute basis using  $k(\text{O}_3 + \text{terpinolene}) = 1.6 \times 10^{-15} \text{ cm}^3 \text{ molecule}^{-1} \text{ s}^{-1}$  (IUPAC, current recommendation).
- (b) The concentrations of  $\alpha$ -phellandrene and 2,3-dimethyl-but-2-ene (the reference compound), with cyclohexane to scavenge HO radicals, were monitored by GC-FID in 6400–6900 L all Teflon chambers at 740 Torr (990 mbar) pressure of purified air in the presence of  $\text{O}_3$ . The measured rate coefficient ratio  $k(\text{O}_3 + \alpha\text{-phellandrene})/k(\text{O}_3 + 2,3\text{-dimethyl-but-2-ene})$  is placed on an absolute basis using  $k(\text{O}_3 + 2,3\text{-dimethyl-but-2-ene}) = 1.09 \times 10^{-15} \text{ cm}^3 \text{ molecule}^{-1} \text{ s}^{-1}$  at 296 K (IUPAC, current recommendation).

**Preferred Values**

| Parameter                                              | Value                 | T/K |
|--------------------------------------------------------|-----------------------|-----|
| $k / \text{cm}^3 \text{ molecule}^{-1} \text{ s}^{-1}$ | $2.9 \times 10^{-15}$ | 298 |
| <i>Reliability</i>                                     |                       |     |
| $\Delta \log k$                                        | $\pm 0.20$            | 298 |

### *Comments on Preferred Values*

The preferred value of the rate coefficient at 298 K is based on the determination of Shu and Atkinson (1994), which supersedes that of Atkinson et al. (1990). The earlier absolute rate coefficient determinations reported by Grimsrud et al. (1975) for  $\alpha$ -phellandrene, and also for several other terpenes, appear to be systematically high.

The reaction is expected to proceed by initial addition of O<sub>3</sub> to each of the C=C bonds in conjugated cyclic diene system, to form a pair of “primary ozonides”. These rapidly decompose to form four C<sub>10</sub> carbonyl-substituted Criegee intermediates, each of which has two stereo-conformers. HO radicals may potentially be formed (in conjunction with a number of  $\beta$ -oxo-alkenyl radicals) from the appropriate conformer of three of the Criegee intermediates, via the well-established decomposition mechanism involving a 1,4-H atom migration to form a vinyl hydroperoxide intermediate (e.g. see Johnson and Marston, 2008). In addition, HO formation via a rapid 1,6-allyl H atom migration is available for a further conformer (Vereecken et al., 2017), forming a conjugated vinyl hydroperoxide intermediate. Accordingly, formation of HO radicals has been quantified in chamber studies (Herrmann et al., 2010; Mackenzie-Rae et al., 2017), with a preferred yield of (32  $\pm$  10) % based on these observations. Mackenzie-Rae et al. (2017; 2018) reported evidence for formation of a number of products that can be formed from the subsequent chemistry of some of the  $\beta$ -oxo-alkenyl radicals and by other routes. These included low yields of a number of identified small products, including formaldehyde (5 – 9 %), glyoxal (6 – 23 %), methyl glyoxal (2 – 9 %), formic acid (22 – 37 %) and acetic acid (9 – 22 %). Reissell et al. (1999) have also reported an upper limit yield of acetone of < 2 %, suggesting that it is not formed as a first-generation product.

Mackenzie-Rae et al. (2017) also reported an average rate coefficient of  $(1.0 \pm 0.7) \times 10^{-16}$  cm<sup>3</sup> molecule<sup>-1</sup> s<sup>-1</sup> for bulk ozonolysis of the first-generation suite of unsaturated products (which each contains a residual double bond), based on simulations of the time-dependence of the system using a detailed mechanism. Associated HO radical yields of 8 – 11 % and 15  $\pm$  7 % were also determined by Herrmann et al. (2010) and Mackenzie-Rae et al. (2017), respectively.

### **References**

- Atkinson, R., Hasegawa, D. and Aschmann, S. M.: *Int. J. Chem. Kinet.*, 22, 871, 1990.  
Atkinson, R. and Arey, J.: *Chem. Rev.*, 103, 4605, 2003.  
Grimsrud, E. P., Westberg, H. H. and Rasmussen, R. A.: *Int. J. Chem. Kinet., Symp.* 1, 183, 1975.  
Herrmann, F., Winterhalter, R., Moortgat, G. K. and Williams, J.: *Atmos. Environ.*, 44, 3458, 2010.  
Johnson, D. and Marston, G.: *Chem. Soc. Rev.*, 37, 699, 2008.  
Mackenzie-Rae, F. A., Liu, T., Deng, W., Saunders, S. M., Fang, Z., Zhang, Y., and Wang, X.: *Atmos. Chem. Phys.*, 17, 6583, 2017.  
Mackenzie-Rae, F. A., Wallis, H. J., Rickard, A. R., Pereira, K. L., Saunders, S. M., Wang, X., and Hamilton, J. F.: *Atmos. Chem. Phys.*, 18, 4673, 2018.  
Reissell, A., Harry, C., Aschmann, S. M., Atkinson, R. and Arey, J.: *J. Geophys. Res.*, 104, 13869, 1999.  
Shu, Y. and Atkinson, R.: *Int. J. Chem. Kinet.*, 26, 1193, 1994.  
Vereecken, L., Novelli, A. and Taraborrelli, D.: *Phys. Chem. Chem. Phys.*, 19, 31599, 2017.



**Ox\_VOC27:  $\beta$ -phellandrene**

Last evaluated: August 2018; Last change in preferred values: August 2018

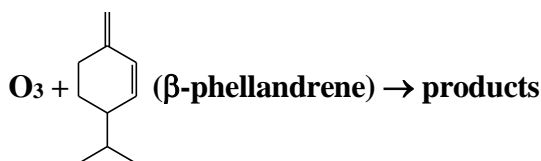**Rate coefficient data**

| $k/\text{cm}^3 \text{ molecule}^{-1} \text{ s}^{-1}$ | Temp./K     | Reference             | Technique/Comments |
|------------------------------------------------------|-------------|-----------------------|--------------------|
| <i>Absolute Rate Coefficients</i>                    |             |                       |                    |
| $1.8 \times 10^{-16}$                                | $295 \pm 1$ | Grimsrud et al., 1975 | F-CL               |
| <i>Relative Rate Coefficients</i>                    |             |                       |                    |
| $(5.22 \pm 1.35) \times 10^{-17}$                    | $297 \pm 2$ | Shorees et al., 1991  | RR-GC (a)          |

 $\beta$ -phellandrene is 3-isopropyl-6-methylene-cyclohexene**Comments**

- (a) The concentrations of  $\beta$ -phellandrene and  $\alpha$ -pinene (the reference compound), with cyclohexane to scavenge HO radicals, were monitored by GC-FID in a 6400 L all Teflon chamber at 740 Torr (990 mbar) pressure of purified air in the presence of  $\text{O}_3$ . The measured rate coefficient ratio  $k(\text{O}_3 + \alpha\text{-phellandrene})/k(\text{O}_3 + \alpha\text{-pinene})$  is placed on an absolute basis using  $k(\text{O}_3 + \alpha\text{-pinene}) = 9.53 \times 10^{-17} \text{ cm}^3 \text{ molecule}^{-1} \text{ s}^{-1}$  at 297 K (IUPAC, current recommendation).  $\beta$ -phellandrene concentrations were corrected to account for the presence of a co-eluting limonene impurity, initially present at ~10 % of the  $\beta$ -phellandrene concentration.

**Preferred Values**

| Parameter                                              | Value                 | T/K |
|--------------------------------------------------------|-----------------------|-----|
| $k / \text{cm}^3 \text{ molecule}^{-1} \text{ s}^{-1}$ | $5.2 \times 10^{-17}$ | 298 |
| <i>Reliability</i>                                     |                       |     |
| $\Delta \log k$                                        | $\pm 0.30$            | 298 |

*Comments on Preferred Values*

The preferred value of the rate coefficient at 298 K is based on the relative rate coefficient determination of Shorees et al. (1991), but with wide uncertainty limits to reflect complications in the measurements of  $\beta$ -phellandrene concentrations (see comment (a)). The earlier absolute rate coefficient determinations reported by Grimsrud et al. (1975) for  $\beta$ -phellandrene, and also for several other terpenes, appear to be systematically high.

There has been only limited product and mechanistic information reported in the literature. Atkinson et al. (1992) reported a yield of HO radicals of  $(14^{+7}_{-5})\%$ , and Hakola et al. (1993) a yield of 4-isopropylcyclohex-2-enone of  $(29 \pm 6)\%$  from the ozonolysis of  $\beta$ -phellandrene. The reaction is likely to proceed

by initial addition of  $O_3$  to each of the endocyclic and exocyclic  $C=C$  bonds in conjugated diene system, to form a pair of "primary ozonides". That formed from addition to the exocyclic  $C=C$  bond partly decomposes to form 4-isopropyl-cyclohex-2-enone and  $CH_2OO$ ; and partly to form  $HCHO$  and a complex Criegee intermediate of molecular formula  $C_9H_{14}OO$ , which (if stabilized) may form additional 4-isopropyl-cyclohex-2-enone following reaction with water vapour.  $HO$  radicals may be formed from the  $Z$ - conformer of  $C_9H_{14}OO$  by the accepted  $HO$ -forming mechanism involving abstraction of a  $\beta$ -hydrogen via a vinyl hydroperoxide intermediate (e.g. see Johnson and Marston, 2008).

The primary ozonide formed from addition of  $O_3$  to the endocyclic double bond is expected to decompose to form two carbonyl-substituted  $C_{10}$  Criegee intermediates. One of these is unlikely to form  $HO$ , owing to the absence of  $\beta$ -hydrogen atoms, with the accepted  $HO$ -forming mechanism only being available for the  $Z$ - conformer of the other Criegee intermediate. The low yield  $HO$  from the reaction of  $O_3$  with  $\beta$ -phellandrene is therefore generally consistent with expectations.

### References

- Atkinson, R., Aschmann, S. M., Arey, J. and Shorees, B.: *J. Geophys. Res.*, 97, 6065, 1992.  
Grimsrud, E. P., Westberg, H. H. and Rasmussen, R. A.: *Int. J. Chem. Kinet., Symp.* 1, 183, 1975.  
Hakola, H., Shorees, B., Arey, J. and Atkinson, R.: *Environ. Sci. Technol.*, 27, 278, 1993.  
Johnson, D. and Marston, G.: *Chem. Soc. Rev.*, 37, 699, 2008.  
Shorees, B., Atkinson, R. and Arey, J.: *Int. J. Chem. Kinet.*, 23, 897, 1991.

**Ox\_VOC28: sabinene**

Last evaluated: August 2018; Last change in preferred values: August 2018

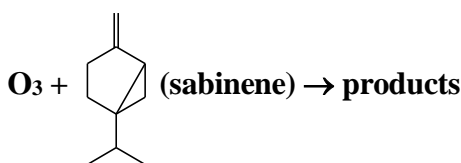**Rate coefficient data**

| $k/\text{cm}^3 \text{ molecule}^{-1} \text{ s}^{-1}$ | Temp./K     | Reference              | Technique/<br>Comments |
|------------------------------------------------------|-------------|------------------------|------------------------|
| <i>Absolute Rate Coefficients</i>                    |             |                        |                        |
| $(8.07 \pm 0.83) \times 10^{-17}$                    | $296 \pm 2$ | Atkinson et al., 1990a | S-CL/GC (a)            |
| $(6.2 \pm 2.1) \times 10^{-17}$                      | $297 \pm 1$ | Bernard et al., 2012   | F-CL (b)               |
| <i>Relative Rate Coefficients</i>                    |             |                        |                        |
| $(9.55 \pm 1.04) \times 10^{-17}$                    | $296 \pm 2$ | Atkinson et al., 1990b | RR-GC (c)              |
| $(9.03 \pm 0.77) \times 10^{-16}$                    | $303 \pm 1$ | Bernard et al., 2012   | RR-IR (d,e)            |
| $(8.40 \pm 1.15) \times 10^{-16}$                    | $303 \pm 1$ |                        | RR-IR (d,f)            |

sabinene is 1-isopropyl-4-methylene-bicyclo[3.1.0]hexane

**Comments**

- (a)  $k$  determined from the observed first-order rate of ozone decay (measured with a chemiluminescence analyzer) in the presence of known excess concentrations of sabinene (measured by GC-FID). Experiments were carried out at a total pressure of 980 mbar in a 160 L Teflon chamber.
- (b)  $k$  determined from the observed first-order rate of ozone decay (measured with a chemiluminescence analyzer) in the presence of known excess concentrations of sabinene, in a flow reactor at a total pressure of ~1 bar.
- (c) The concentrations of a series of alkenes (including sabinene and  $\alpha$ -pinene, the reference compound), with cyclohexane to scavenge HO radicals, were monitored by GC-FID in a 3600 L Teflon chamber at 740 Torr (990 mbar) pressure of purified air in the presence of O<sub>3</sub>. The measured rate coefficient ratio  $k(\text{O}_3 + \text{sabinene})/k(\text{O}_3 + \alpha\text{-pinene})$  is placed on an absolute basis using  $k(\text{O}_3 + \alpha\text{-pinene}) = 9.46 \times 10^{-17} \text{ cm}^3 \text{ molecule}^{-1} \text{ s}^{-1}$  at 296 K (IUPAC, current recommendation).
- (d) The concentrations of sabinene and cyclohexene or *cis*-cyclooctene (the reference compounds) were monitored by FT-IR in reacting O<sub>3</sub> - sabinene - reference compound - cyclohexane (HO radical scavenger) - air mixtures in a 7300 L Teflon chamber at ~1 bar pressure. The measured rate coefficient ratios,  $k(\text{O}_3 + \text{sabinene})/k(\text{O}_3 + \text{cyclohexene}) = 1.05 \pm 0.09$ , and  $k(\text{O}_3 + \text{sabinene})/k(\text{O}_3 + \text{cis-cyclooctene}) = 0.22 \pm 0.03$ , are placed on an absolute basis using  $k(\text{O}_3 + \text{cyclohexene}) = 8.60 \times 10^{-17} \text{ cm}^3 \text{ molecule}^{-1} \text{ s}^{-1}$  and  $k(\text{O}_3 + \text{cis-cyclooctene}) = 3.82 \times 10^{-16} \text{ cm}^3 \text{ molecule}^{-1} \text{ s}^{-1}$  at 303 K (Atkinson and Arey, 2003).
- (e) Relative to  $k(\text{O}_3 + \text{cyclohexene})$ .
- (f) Relative to  $k(\text{O}_3 + \text{cis-cyclooctene})$ .

## Preferred Values

| Parameter                                              | Value                 | T/K |
|--------------------------------------------------------|-----------------------|-----|
| $k / \text{cm}^3 \text{ molecule}^{-1} \text{ s}^{-1}$ | $8.3 \times 10^{-17}$ | 298 |
| <i>Reliability</i>                                     |                       |     |
| $\Delta \log k$                                        | $\pm 0.15$            | 298 |

### Comments on Preferred Values

The preferred value of the rate coefficient at 298 K is the average of the determinations of Atkinson et al. (1990a; 1990b) and Bernard et al. (2012), which are in good agreement.

The reaction proceeds by initial addition of  $\text{O}_3$  to the  $\text{C}=\text{C}$  bond to form a “primary ozonide (POZ)” which rapidly decomposes to form two sets of “primary” carbonyl product plus Criegee intermediate, as shown in the following schematic:

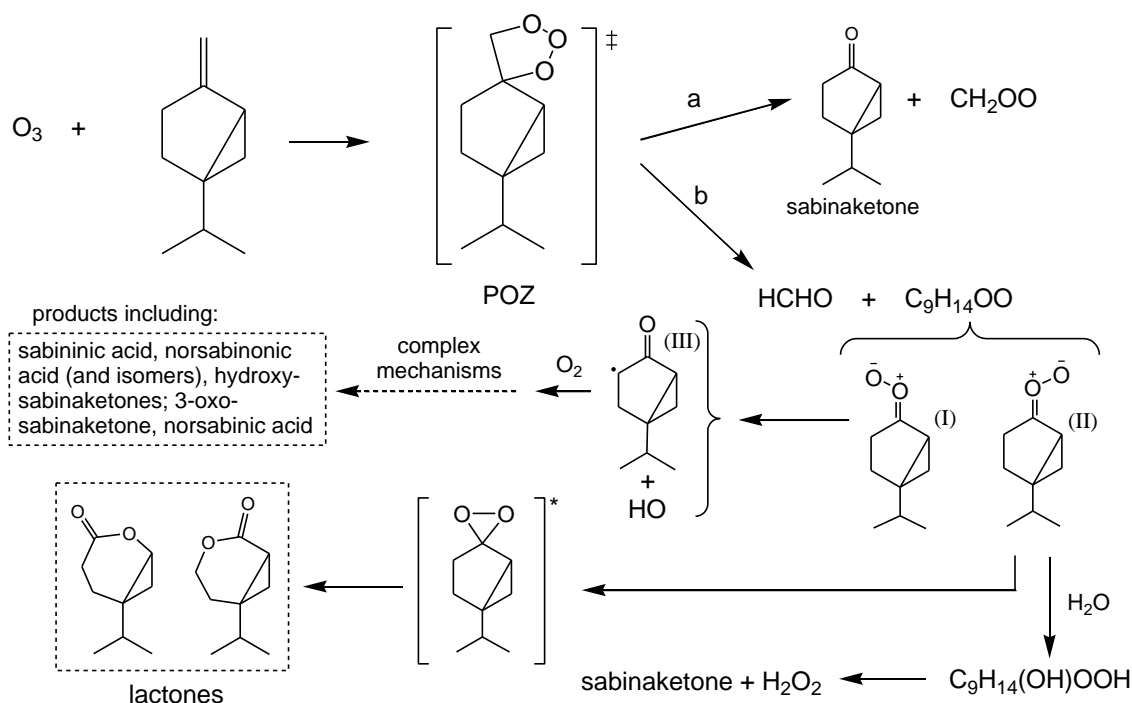

Sabinaketone (5-isopropyl-bicyclo[3.1.0]hexan-2-one) has been reported to be formed with yields in the range (35 – 50) % (Hakola et al., 1994; Yu et al., 1999; Chiappini et al., 2006), and  $\text{HCHO}$  with a yield of  $(52 \pm 9)$  % (Chiappini et al., 2006), providing evidence for the significant participation of both decomposition channels, (a) and (b).

The Criegee intermediate,  $\text{CH}_2\text{OO}$  (formed from channel (a)), is expected to be almost fully stabilised at atmospheric pressure, by analogy with the  $\beta$ -pinene system (Nguyen et al., 2009). Its reaction with  $\text{H}_2\text{O}$  partially forms  $\text{HCOOH}$  (see data sheet Ox\_VOC5), which has been reported to be formed with a yield of  $(17 \pm 7)$  % from the ozonolysis of sabinene (Chiappini et al., 2006). The reported HO production from sabinene ozonolysis (Atkinson et al., 1992; Aschmann et al., 2002), preferred yield  $33 \pm 5$  %, is expected to result mainly from reactions of the Criegee intermediate  $\text{C}_9\text{H}_{14}\text{OO}$  formed in channel (b), which has the two conformers, (I) and (II). In practice, formation of HO via the accepted decomposition mechanism (involving abstraction of a  $\beta$ -hydrogen via a vinyl hydroperoxide

intermediate) may only be possible for conformer (I), owing to the relevant  $\beta$ -hydrogen in conformer (II) being at the bridgehead of a constrained bicyclic structure, as discussed for a structurally similar Criegee intermediate formed from  $\beta$ -pinene by Rickard et al. (1999) and Nguyen et al. (2009); and this would help explain the relatively low HO yield from sabinene ozonolysis. The alternative well-documented decomposition route for conformer (II), via a dioxirane intermediate (e.g. Johnson and Marston, 2008), leads to the formation of lactones (6-isopropyl-2-oxa-bicyclo[4.1.0]heptan-3-one and/or 6-isopropyl-3-oxa-bicyclo[4.1.0]heptan-2-one), the detection of which has been reported by Griesbaum and Miclaus (1998) and Chiappini et al. (2006). Conformer (II) may also potentially react with  $\text{H}_2\text{O}$  under atmospheric conditions, forming  $\text{H}_2\text{O}_2$  and additional sabinaketone.

The generation of HO from conformer (I) is accompanied by the formation of  $\beta$ -oxo alkyl radical (III), the further chemistry of which may form a number of reported multifunctional organic products containing hydroxy, carbonyl and acid functionalities (Yu et al., 1999; Warscheid and Hoffmann, 2001; Chiappini et al., 2006).

## References

- Aschmann, S. M., Arey, J. and Atkinson, R.: Atmos. Environ., 36, 4347, 2002.
- Atkinson, R. and Arey, J.: Chem. Rev., 103, 4605, 2003.
- Atkinson, R., Aschmann, S. M. and Arey, J.: Atmos. Environ., 24A, 2647, 1990a.
- Atkinson, R., Hasegawa, D. and Aschmann, S. M.: Int. J. Chem. Kinet., 22, 871, 1990b.
- Atkinson, R., Aschmann, S. M., Arey, J. and Shorees, B.: J. Geophys. Res., 97, 6065, 1992.
- Bernard, F., Fedioun, I., Peyroux, F., Quilgars, A., Daële, V. and Mellouki, A.: J. Aerosol Sci., 43, 14, 2012.
- Chiappini, L., Carrasco, N., Temine, B., Picquet-Varrault, B., Durand-Jolibois, R., Wenger, J. C. and Doussin, J. F.: Environ. Chem., 3, 286, 2006.
- Griesbaum, K. and Miclaus, V.: Environ. Sci. Technol., 32, 647, 1998.
- Hakola, H., Arey, J., Aschmann, S. M. and Atkinson, R.: J. Atmos. Chem., 18, 75, 1994.
- Johnson, D. and Marston, G.: Chem. Soc. Rev., 37, 699, 2008.
- Nguyen, T. L., Peeters, J. and Vereecken, L.: Phys. Chem. Chem. Phys., 11, 5643, 2009.
- Rickard, A. R., Johnson, D., McGill, C. D. and Marston, G.: J. Phys. Chem. A, 103, 7656, 1999.
- Warscheid, B. and Hoffmann, T.: Rapid Commun. Mass Spectrom., 15, 2259, 2001.
- Yu, J., Cocker III, D. R., Griffin, R. J., Flagan, R. C., Seinfeld, J. H.: J. Atmos. Chem., 34, 207, 1999.

**Ox\_VOC29:  $\alpha$ -terpinene**

Last evaluated: August 2018; Last change in preferred values: June 2015

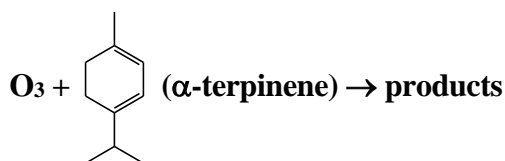**Rate coefficient data**

| $k/\text{cm}^3 \text{ molecule}^{-1} \text{ s}^{-1}$ | Temp./K     | Reference              | Technique/Comments |
|------------------------------------------------------|-------------|------------------------|--------------------|
| <i>Absolute Rate Coefficients</i>                    |             |                        |                    |
| $8.8 \times 10^{-14}$                                | $295 \pm 1$ | Grimsrud et al., 1975  | F-CL               |
| <i>Relative Rate Coefficients</i>                    |             |                        |                    |
| $(9.82 \pm 2.64) \times 10^{-15}$                    | $296 \pm 2$ | Atkinson et al., 1990  | RR-GC (a)          |
| $(2.62 \pm 0.88) \times 10^{-14}$                    | $296 \pm 2$ | Shu and Atkinson, 1994 | RR-GC (b),(c)      |
| $(2.18 \pm 0.23) \times 10^{-14}$                    | $296 \pm 2$ | Shu and Atkinson, 1994 | RR-GC (b),(d)      |
| $(1.60 \pm 0.43) \times 10^{-14}$                    | $296 \pm 2$ | Witter et al., 2002    | RR-GC (e)          |

 $\alpha$ -terpinene is 1-isopropyl-4-methyl-cyclohexa-1,3-diene**Comments**

- (a) The concentrations of a series of alkenes (including  $\alpha$ -terpinene and terpinolene, the reference compound), with cyclohexane to scavenge HO radicals, were monitored by GC-FID in a 3600 L Teflon chamber at 740 Torr (990 mbar) pressure of purified air in the presence of  $\text{O}_3$ . The measured rate coefficient ratio,  $k(\text{O}_3 + \alpha\text{-terpinene})/k(\text{O}_3 + \text{terpinolene}) = (6.14 \pm 1.24)$ , is placed on an absolute basis using  $k(\text{O}_3 + \text{terpinolene}) = 1.6 \times 10^{-15} \text{ cm}^3 \text{ molecule}^{-1} \text{ s}^{-1}$  (IUPAC, current recommendation).
- (b) The concentrations of  $\alpha$ -terpinene and 2,3-dimethyl-but-2-ene or  $\beta$ -caryophyllene (the reference compounds), with cyclohexane to scavenge HO radicals, were monitored by GC-FID in 6400–6900 L all Teflon chambers at 740 Torr (990 mbar) pressure of purified air in the presence of  $\text{O}_3$ . The measured rate coefficient ratios,  $k(\text{O}_3 + \alpha\text{-terpinene})/k(\text{O}_3 + 2,3\text{-dimethyl-but-2-ene}) = (24.0 \pm 8.0)$  and  $k(\text{O}_3 + \alpha\text{-terpinene})/k(\text{O}_3 + \beta\text{-caryophyllene}) = (1.82 \pm 0.06)$ , are placed on an absolute basis using  $k(\text{O}_3 + 2,3\text{-dimethyl-but-2-ene}) = 1.09 \times 10^{-15} \text{ cm}^3 \text{ molecule}^{-1} \text{ s}^{-1}$  and  $k(\text{O}_3 + \beta\text{-caryophyllene}) = 1.2 \times 10^{-14} \text{ cm}^3 \text{ molecule}^{-1} \text{ s}^{-1}$  at 296 K (IUPAC, current recommendations). The final value of  $k$  quoted by the authors was based on the more precise measurement relative to  $\beta$ -caryophyllene.
- (c) Relative to 2,3-dimethyl-but-2-ene.
- (d) Relative to  $\beta$ -caryophyllene.
- (e) The concentrations of  $\alpha$ -terpinene and 2,3-dimethyl-but-2-ene (the reference compound) were monitored by GC in reacting  $\text{O}_3$  -  $\alpha$ -terpinene - 2,3-dimethyl-but-2-ene -  $m$ -xylene (the HO radical scavenger) - air mixtures in a flow system at 100 mbar pressure. The measured rate coefficient ratio,  $k(\text{O}_3 + \alpha\text{-terpinene})/k(\text{O}_3 + 2,3\text{-dimethyl-but-2-ene}) = (14.7 \pm 0.7)$ , is placed on an absolute basis using  $k(\text{O}_3 + 2,3\text{-dimethyl-but-2-ene}) = 1.09 \times 10^{-15} \text{ cm}^3 \text{ molecule}^{-1} \text{ s}^{-1}$  at 295 K (IUPAC current recommendation).

### Preferred Values

| Parameter                                              | Value                 | T/K |
|--------------------------------------------------------|-----------------------|-----|
| $k / \text{cm}^3 \text{ molecule}^{-1} \text{ s}^{-1}$ | $1.9 \times 10^{-14}$ | 298 |
| <i>Reliability</i>                                     |                       |     |
| $\Delta \log k$                                        | $\pm 0.20$            | 298 |

### Comments on Preferred Values

The preferred value of the rate coefficient at 298 K is the average of the more precise determination of Shu and Atkinson (1994), as favoured by the authors (see comment (c)), and the determination of Witter et al. (2002). The more approximate determination of Atkinson et al. (1990) is superseded by the study of Shu and Atkinson (1994). The earlier absolute rate coefficient determinations reported by Grimsrud et al. (1975) for  $\alpha$ -terpinene, and also for several other terpenes, appear to be systematically high. The assigned uncertainty in  $k$  reflects the range of values reported in the relative rate studies.

There has been only limited product and mechanistic information reported in the literature. Aschmann et al. (2002) and Herrmann et al. (2010) reported respective HO radical yields of  $(38 \pm 5) \%$  and  $(24 - 28) \%$ ; and Reissell et al. (1999) a yield of acetone of  $(3 \pm 1) \%$ . The reaction is likely to proceed by initial addition of  $\text{O}_3$  to each of the C=C bonds in the cyclic conjugated diene system, to form a pair of “primary ozonides” which rapidly decompose to form four carbonyl-substituted Criegee intermediates. HO radicals may be formed (in conjunction with a number of  $\beta$ -oxo-alkenyl radicals) from decomposition of the Criegee intermediates, via the accepted mechanism involving abstraction of a  $\beta$ -hydrogen via a vinyl hydroperoxide intermediate (e.g. see Johnson and Marston, 2008). Acetone is most likely to be formed as a first-generation product from the further reactions of one of the  $\beta$ -oxo-alkenyl radicals.

### References

- Aschmann, S. M., Arey, J. and Atkinson, R.: Atmos. Environ., 36, 4347, 2002.  
 Atkinson, R., Hasegawa, D. and Aschmann, S. M.: Int. J. Chem. Kinet., 22, 871, 1990.  
 Grimsrud, E. P., Westberg, H. H. and Rasmussen, R. A.: Int. J. Chem. Kinet., Symp. 1, 183, 1975.  
 Herrmann, F., Winterhalter, R., Moortgat, G. K. and Williams, J.: Atmos. Environ., 44, 3458, 2010.  
 Johnson, D. and Marston, G.: Chem. Soc. Rev., 37, 699, 2008.  
 Reissell, A., Harry, C., Aschmann, S. M., Atkinson, R. and Arey, J.: J. Geophys. Res., 104, 13869, 1999.  
 Shu, Y. and Atkinson, R.: Int. J. Chem. Kinet., 26, 1193, 1994.  
 Witter, M., Berndt, T., Böge, O., Stratmann, F. and Heintzenberg, J.: Int. J. Chem. Kinet., 34, 394, 2002.

**Ox\_VOC30:  $\gamma$ -terpinene**

Last evaluated: August 2018; Last change in preferred values: August 2018

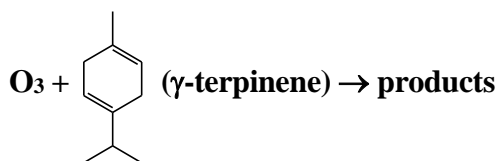**Rate coefficient data**

| $k/\text{cm}^3 \text{ molecule}^{-1} \text{ s}^{-1}$ | Temp./K     | Reference             | Technique/Comments |
|------------------------------------------------------|-------------|-----------------------|--------------------|
| <i>Absolute Rate Coefficients</i>                    |             |                       |                    |
| $2.8 \times 10^{-16}$                                | $295 \pm 1$ | Grimsrud et al., 1975 | F-CL               |
| <i>Relative Rate Coefficients</i>                    |             |                       |                    |
| $(1.55 \pm 0.17) \times 10^{-16}$                    | $296 \pm 2$ | Atkinson et al., 1990 | RR-GC (a)          |

 $\gamma$ -terpinene is 1-isopropyl-4-methyl-cyclohexa-1,4-diene**Comments**

- (a) The concentrations of a series of alkenes (including  $\gamma$ -terpinene and  $\alpha$ -pinene, the reference compound), with cyclohexane to scavenge HO radicals, were monitored by GC-FID in a 3600 L Teflon chamber at 740 Torr (990 mbar) pressure of purified air in the presence of  $\text{O}_3$ . The measured rate coefficient ratio  $k(\text{O}_3 + \gamma\text{-terpinene})/k(\text{O}_3 + \alpha\text{-pinene})$  is placed on an absolute basis using  $k(\text{O}_3 + \alpha\text{-pinene}) = 9.46 \times 10^{-17} \text{ cm}^3 \text{ molecule}^{-1} \text{ s}^{-1}$  at 296 K (IUPAC, current recommendation).

**Preferred Values**

| Parameter                                              | Value                 | T/K |
|--------------------------------------------------------|-----------------------|-----|
| $k / \text{cm}^3 \text{ molecule}^{-1} \text{ s}^{-1}$ | $1.6 \times 10^{-16}$ | 298 |
| <i>Reliability</i>                                     |                       |     |
| $\Delta \log k$                                        | $\pm 0.30$            | 298 |

**Comments on Preferred Values**

The preferred value of the rate coefficient at 298 K is based on the relative rate coefficient determination of Atkinson et al. (1990). The absolute rate coefficient determination reported by Grimsrud et al. (1975) is about a factor of two higher, but within the upper uncertainty bound assigned to the preferred value. The Atkinson et al. (1990) value is preferred, because those reported by Grimsrud et al. (1975) for a series of terpenes appear to be systematically high.

There has been only limited product and mechanistic information reported in the literature. Aschmann et al. (2002) reported a yield of HO radicals of  $(81 \pm 11) \%$ ; and Reissell et al. (1999) a yield of acetone of  $(11 \pm 2) \%$ . The reaction is likely to proceed by initial addition of  $\text{O}_3$  to each of the endocyclic C=C bonds, to form a pair of “primary ozonides” which rapidly decompose to form four



carbonyl-substituted Criegee intermediates. HO radicals may be formed (in conjunction with a number of  $\beta$ -oxo-alkenyl radicals) from decomposition of all of the Criegee intermediates, via the accepted mechanism involving abstraction of a  $\beta$ -hydrogen via a vinyl hydroperoxide intermediate (e.g. see Johnson and Marston, 2008). Acetone is most likely to be formed as a first-generation product from the further reactions of one of the  $\beta$ -oxo-alkenyl radicals, which contains a *gem*-dimethyl substituent at the radical centre.

### References

- Aschmann, S. M., Arey, J. and Atkinson, R.: Atmos. Environ., 36, 4347, 2002.  
Atkinson, R., Hasegawa, D. and Aschmann, S. M.: Int. J. Chem. Kinet., 22, 871, 1990.  
Grimsrud, E. P., Westberg, H. H. and Rasmussen, R. A.: Int. J. Chem. Kinet., Symp. 1, 183, 1975.  
Johnson, D. and Marston, G.: Chem. Soc. Rev., 37, 699, 2008.  
Reissell, A., Harry, C., Aschmann, S. M., Atkinson, R. and Arey, J.: J. Geophys. Res., 104, 13869, 1999.

**Ox\_VOC31: terpinolene**

Last evaluated: August 2018; Last change in preferred values: September 2013

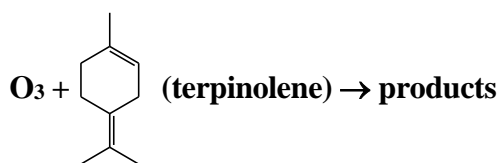**Rate coefficient data**

| $k/\text{cm}^3 \text{ molecule}^{-1} \text{ s}^{-1}$ | Temp./K       | Reference              | Technique/Comments |
|------------------------------------------------------|---------------|------------------------|--------------------|
| <i>Absolute Rate Coefficients</i>                    |               |                        |                    |
| $(7.3 \pm 2.2) \times 10^{-16}$                      | 298           | Japar et al., 1974     | S-CL               |
| $1.0 \times 10^{-14}$                                | $295 \pm 1$   | Grimsrud et al., 1975  | F-CL               |
| <i>Relative Rate Coefficients</i>                    |               |                        |                    |
| $(1.46 \pm 0.26) \times 10^{-15}$                    | $296 \pm 2$   | Atkinson et al., 1990  | RR-GC (a)          |
| $(1.83 \pm 0.04) \times 10^{-15}$                    | $296 \pm 2$   | Shu and Atkinson, 1994 | RR-GC (b)          |
| $(1.74 \pm 0.46) \times 10^{-15}$                    | $295 \pm 0.5$ | Witter et al., 2002    | RR-GC (c)          |
| $(1.41 \pm 0.40) \times 10^{-15}$                    | $298 \pm 2$   | Stewart et al., 2013   | RR-GC (d)          |

terpinolene is 4-isopropylidene-1-methyl-cyclohexene

**Comments**

- (a) The concentrations of a series of alkenes (including terpinolene and limonene, the reference compound), with cyclohexane to scavenge HO radicals, were monitored by GC-FID in a 3600 L Teflon chamber at 740 Torr (990 mbar) pressure of purified air in the presence of O<sub>3</sub>. The measured rate coefficient ratio  $k(\text{O}_3 + \text{terpinolene})/k(\text{O}_3 + \text{limonene})$  is placed on an absolute basis using  $k(\text{O}_3 + \text{limonene}) = 2.16 \times 10^{-16} \text{ cm}^3 \text{ molecule}^{-1} \text{ s}^{-1}$  at 296 K (IUPAC, current recommendation).
- (b) The concentrations of terpinolene and 2,3-dimethyl-but-2-ene (the reference compound), with cyclohexane to scavenge HO radicals, were monitored by GC-FID in 6400–6900 L all Teflon chambers at 740 Torr (990 mbar) pressure of purified air in the presence of O<sub>3</sub>. The measured rate coefficient ratio  $k(\text{O}_3 + \text{terpinolene})/k(\text{O}_3 + 2,3\text{-dimethyl-but-2-ene})$  is placed on an absolute basis using  $k(\text{O}_3 + 2,3\text{-dimethyl-but-2-ene}) = 1.09 \times 10^{-15} \text{ cm}^3 \text{ molecule}^{-1} \text{ s}^{-1}$  at 296 K (IUPAC, current recommendation).
- (c) The concentrations of terpinolene and 2,3-dimethyl-but-2-ene (the reference compound) were monitored by GC in reacting O<sub>3</sub> - terpinolene - 2,3-dimethyl-but-2-ene - *m*-xylene (the HO radical scavenger) - air mixtures in a flow system at 100 mbar pressure. The measured rate coefficient ratio of  $k(\text{O}_3 + \text{terpinolene})/k(\text{O}_3 + 2,3\text{-dimethyl-but-2-ene}) = 1.60 \pm 0.06$  is placed on an absolute basis using  $k(\text{O}_3 + 2,3\text{-dimethyl-but-2-ene}) = 1.09 \times 10^{-15} \text{ cm}^3 \text{ molecule}^{-1} \text{ s}^{-1}$  at 296 K (IUPAC, current recommendation).
- (d) The concentrations of terpinolene and limonene (the reference compound) were monitored by GC-FID in flowing mixtures of O<sub>3</sub>, terpinolene, limonene, cyclohexane (the HO radical scavenger) and air at 760 Torr (1.013 bar) pressure. The measured rate coefficient ratio of  $k(\text{O}_3 + \text{terpinolene})/k(\text{O}_3 + \text{limonene}) = 6.41 \pm 0.08$  is placed on an absolute basis using  $k(\text{O}_3 + \text{limonene}) = 2.2 \times 10^{-16} \text{ cm}^3 \text{ molecule}^{-1} \text{ s}^{-1}$  at 298 K (IUPAC, current recommendation).

## Preferred Values

| Parameter                                              | Value                 | T/K |
|--------------------------------------------------------|-----------------------|-----|
| $k / \text{cm}^3 \text{ molecule}^{-1} \text{ s}^{-1}$ | $1.6 \times 10^{-15}$ | 298 |
| <i>Reliability</i>                                     |                       |     |
| $\Delta \log k$                                        | $\pm 0.15$            | 298 |

### Comments on Preferred Values

The preferred value of the rate coefficient at 298 K is an average of the relative rate coefficient determinations of Atkinson et al. (1990), Shu and Atkinson (1994), Witter et al. (2002) and Stewart et al. (2013), which are in good agreement.

The reaction may proceed by initial addition of  $\text{O}_3$  to either of the endocyclic or exocyclic  $\text{C}=\text{C}$  bonds in terpinolene. Comparison of  $k$  for the reaction of ozone with terpinolene with that reported for the reaction of ozone with the terpinolene oxidation product, 4-methylcyclohex-3-en-1-one, which retains the endocyclic  $\text{C}=\text{C}$  bond (Baker et al., 2004), suggests that the reaction of  $\text{O}_3$  with terpinolene occurs predominantly ( $\approx 95\%$ ) at the exocyclic bond. Support for this comes from the distribution of products reported in a number of studies.

The addition of  $\text{O}_3$  to the exocyclic  $\text{C}=\text{C}$  bond in terpinolene forms a “primary ozonide (POZ)” which rapidly decomposes to form two sets of “primary” carbonyl product plus Criegee intermediate, as shown in the following schematic:

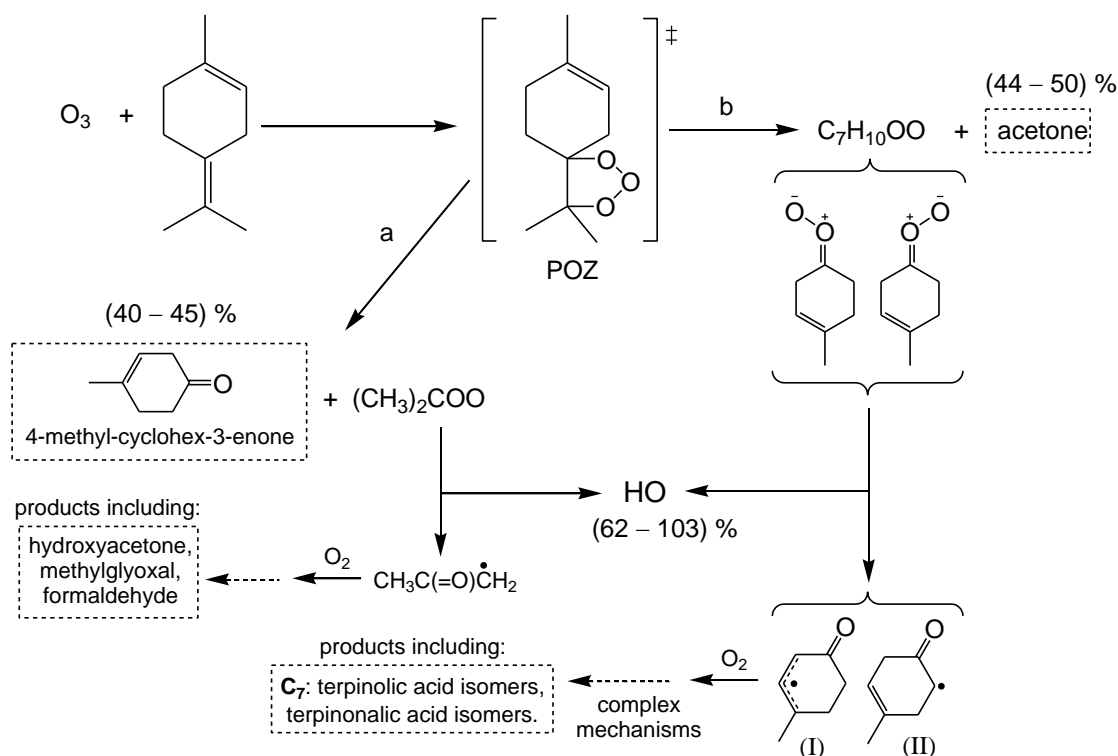

Acetone has been reported to be formed with a yield of (44 – 50) % (Reissell et al., 1999; Orlando et al., 2000; Lee et al., 2006), and 4-methylcyclohex-3-en-1-one with a yield of (40 – 45) % (Hakola et al., 1994; Reissell et al., 1999; Ma and Marston, 2009). This suggests approximately equal contributions from each of the decomposition channels, (a) and (b), as shown in the schematic.

The dialkyl-substituted Criegee intermediates ((CH<sub>3</sub>)<sub>2</sub>COO and both conformers of C<sub>7</sub>H<sub>10</sub>OO) are expected to decompose mainly to form HO radicals and a number of organic co-radicals, as shown in the schematic. Accordingly, high HO radical yields in the range (62 – 103) % have been reported from the reaction of O<sub>3</sub> with terpinolene (Atkinson et al., 1992; Aschmann et al., 2002; Herrmann et al., 2010), preferred value 70 ± 8 %. The decomposition of (CH<sub>3</sub>)<sub>2</sub>COO is expected to form HO in conjunction with the acetonyl radical (see discussion in data sheet Ox\_VOC41), the further chemistry of which potentially leads to the formation of a number of products, including formaldehyde, which has been reported to be formed with a yield of (29 ± 3) % from the ozonolysis of terpinolene (Lee et al., 2006). Decomposition of the two conformers of the more complex Criegee intermediate, C<sub>7</sub>H<sub>10</sub>OO, by the accepted HO-forming mechanism (involving abstraction of a β-hydrogen via a vinyl hydroperoxide intermediate), produces a resonant β-/δ-oxo-alkenyl radical (I) and a β-oxo-alkenyl radical (II), the further chemistry of which may form a number of multifunctional organic products containing hydroxy, carbonyl and acid functionalities, including the terpinolic and terpinonic acids reported and discussed by Ma and Marston (2009).

## References

- Aschmann, S. M., Arey, J. and Atkinson, R.: Atmos. Environ., 36, 4347, 2002.
- Atkinson, R. and Arey, J.: Chem. Rev., 103, 4605, 2003.
- Atkinson, R., Hasegawa, D. and Aschmann, S. M.: Int. J. Chem. Kinet., 22, 871, 1990.
- Atkinson, R., Aschmann, S. M., Arey, J. and Shorees, B.: J. Geophys. Res., 97, 6065, 1992.
- Baker, J., Arey, J. and Atkinson, R.: J. Atmos. Chem., 48, 241, 2004.
- Grimsrud, E. P., Westberg, H. H. and Rasmussen, R. A.: Int. J. Chem. Kinet., Symp. 1, 183, 1975.
- Hakola, H., Arey, J., Aschmann, S. M. and Atkinson, R.: J. Atmos. Chem., 18, 75, 1994.
- Herrmann, F., Winterhalter, R., Moortgat, G. K. and Williams, J.: Atmos. Environ., 44, 3458, 2010.
- Japar, S. M., Wu, C. H. and Niki, H.: Environ. Lett., 7, 245, 1974.
- Lee, A., Goldstein, A. H., Keywood, M. D., Gao, S., Varutbangkul, V., Bahreini, R., Ng, N. L., Flagan, R. C., and Seinfeld, J. H.: J. Geophys. Res., 111, D07302, doi:10.1029/2005JD006437, 2006.
- Ma, Y. and Marston, G.: Phys. Chem. Chem. Phys., 11, 4198, 2009.
- Orlando, J. J., Noziere, B., Tyndall, G. S., Orzechowska, G. E., Paulson, S. E. and Rudich, Y.: J. Geophys. Res., 105(D9), 11,561, 2000.
- Reissell, A., Harry, C., Aschmann, S. M., Atkinson, R. and Arey, J.: J. Geophys. Res., 104, 13869, 1999.
- Shu, Y. and Atkinson, R.: Int. J. Chem. Kinet., 26, 1193, 1994.
- Stewart, D. J., Almarok, S. H., Lockhart, J. P., Mohamed, O. M., Nutt, D. R., Pfrang, C., Marston, G.: Atmos. Environ., 70, 227, 2013.
- Witter, M., Berndt, T., Böge, O., Stratmann, F. and Heintzenberg, J.: Int. J. Chem. Kinet., 34, 394, 2002.
- Zhang, J., Wilson, W. E., and Liou, P. J.: Environ. Sci. Technol., 28, 1975, 1994.

### A3. Data sheets for reactions of O<sub>3</sub> with sesquiterpenes

#### Ox\_VOC32: β-caryophyllene

Last evaluated: August 2018; Last change in preferred values: June 2015

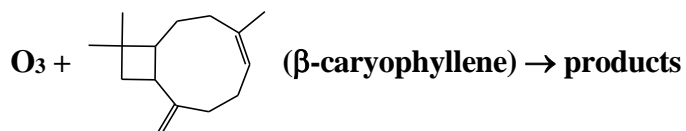

#### Rate coefficient data

| $k/\text{cm}^3 \text{ molecule}^{-1} \text{ s}^{-1}$ | Temp./K     | Reference              | Technique/Comments |
|------------------------------------------------------|-------------|------------------------|--------------------|
| <i>Absolute Rate Coefficients</i>                    |             |                        |                    |
| $(1.2 \pm 1.0) \times 10^{-14}$                      | $295 \pm 2$ | Richters et al., 2015  | S-IR/UVA (a)       |
| <i>Relative Rate Coefficients</i>                    |             |                        |                    |
| $(8.71 \pm 1.23) \times 10^{-15}$                    | $296 \pm 2$ | Shu and Atkinson, 1994 | RR-GC (b),(c)      |
| $(1.09 \pm 0.07) \times 10^{-14}$                    | $296 \pm 2$ | Shu and Atkinson, 1994 | RR-GC (b),(d)      |
| $(1.02 \pm 0.03) \times 10^{-14}$                    | $296 \pm 2$ | Shu and Atkinson, 1994 | RR-GC (b),(e)      |
| $(2.7 \pm 1.9) \times 10^{-15}$                      | $366 \pm 2$ | Ghalaieny et al., 2012 | RR-GC (f)          |
| $(1.39 \pm 0.38) \times 10^{-14}$                    | $295 \pm 2$ | Richters et al., 2015  | RR-GC-MS (g)       |
| $(1.19 \pm 0.21) \times 10^{-14}$                    | $295 \pm 2$ | Richters et al., 2015  | RR-MS (h)          |

β-caryophyllene is 4,11,11-trimethyl-8-methylene-bicyclo[7.2.0]undec-4-ene

#### Comments

- (a)  $k$  determined from the observed rate of ozone decay (measured by UVA at 254 nm) in the presence of known starting concentrations of β-caryophyllene (measured by FT-IR), in stopped-flow experiments at a total pressure of ~1 bar, with sufficient propane to scavenge >99 % of HO radicals. It was not possible to temporally-resolve the ozone decay under pseudo-first order conditions for highly-reactive sesquiterpenes such as β-caryophyllene. The experiments were therefore carried out with comparable starting concentrations of ozone and β-caryophyllene, and the results were solved numerically using an extrapolation method connected with a Newton-technique for parameter estimation.
- (b) The concentrations of β-caryophyllene and 2-methyl-but-2-ene, 2,3-dimethyl-but-2-ene or terpinolene (the reference compounds), with cyclohexane to scavenge HO radicals, were monitored by GC-FID in 6400–6900 L all Teflon chambers at 740 Torr (990 mbar) pressure of purified air in the presence of O<sub>3</sub>. The measured rate coefficient ratios,  $k(\text{O}_3 + \beta\text{-caryophyllene})/k(\text{O}_3 + 2\text{-methyl-but-2-ene}) = (22.0 \pm 3.1)$ ,  $k(\text{O}_3 + \beta\text{-caryophyllene})/k(\text{O}_3 + 2,3\text{-dimethyl-but-2-ene}) = (9.98 \pm 0.60)$  and  $k(\beta\text{-caryophyllene})/k(\text{O}_3 + \text{terpinolene}) = (6.40 \pm 0.20)$ , are placed on an absolute basis using  $k(\text{O}_3 + 2\text{-methyl-but-2-ene}) = 3.96 \times 10^{-16} \text{ cm}^3 \text{ molecule}^{-1} \text{ s}^{-1}$  (Atkinson and Arey, 2003);  $k(\text{O}_3 + 2,3\text{-dimethyl-but-2-ene}) = 1.09 \times 10^{-15} \text{ cm}^3 \text{ molecule}^{-1} \text{ s}^{-1}$  at 296 K and  $k(\text{O}_3 + \text{terpinolene}) = 1.6 \times 10^{-15} \text{ cm}^3 \text{ molecule}^{-1} \text{ s}^{-1}$  (IUPAC, current recommendations). The final value of  $k$  quoted by the authors was based on the more precise measurements relative to 2,3-dimethyl-but-2-ene and terpinolene.
- (c) Relative to 2-methyl-but-2-ene.

- (d) Relative to 2,3-dimethyl-but-2-ene.
- (e) Relative to terpinolene.
- (f) The concentrations of  $\beta$ -caryophyllene and 2,3-dimethyl-but-2-ene (the reference compound), with excess cyclohexane to scavenge HO radicals, were monitored by GC-FID in a 123 L Teflon-coated chamber at 780 Torr (1040 mbar) pressure of  $N_2$ , with repeated injections of  $O_3/O_2$ . The measured rate coefficient ratio,  $k(O_3 + \beta\text{-caryophyllene})/k(O_3 + 2,3\text{-dimethyl-but-2-ene}) = 2.04$ , is placed on an absolute basis using  $k(O_3 + 2,3\text{-dimethyl-but-2-ene}) = 1.32 \times 10^{-15} \text{ cm}^3 \text{ molecule}^{-1} \text{ s}^{-1}$  at 366 K (IUPAC, current recommendation). It is noted that the authors used a much lower value of  $k(O_3 + 2,3\text{-dimethyl-but-2-ene}) = 2.89 \times 10^{-17} \text{ cm}^3 \text{ molecule}^{-1} \text{ s}^{-1}$ , based on a relative rate measurement reported in the same study, leading to a reported value of  $k = (5.9 \pm 4.2) \times 10^{-17} \text{ cm}^3 \text{ molecule}^{-1} \text{ s}^{-1}$  at 366 K.
- (g) The concentrations of  $\beta$ -caryophyllene and  $\alpha$ -terpinene (the reference compound), with 2-methylpropene to scavenge HO radicals, were monitored by GC-MS in a flow tube at atmospheric pressure. The measured rate coefficient ratio,  $k(O_3 + \beta\text{-caryophyllene})/k(O_3 + \alpha\text{-terpinene}) = (0.73 \pm 0.04)$ , is placed on an absolute basis using  $k(O_3 + \alpha\text{-terpinene}) = 1.9 \times 10^{-14} \text{ cm}^3 \text{ molecule}^{-1} \text{ s}^{-1}$  (IUPAC, current recommendation).
- (h) The concentrations of  $\beta$ -caryophyllene and 2,3-dimethyl-but-2-ene (the reference compound), with propane to scavenge HO radicals, were monitored by PTR-MS in a flow tube at atmospheric pressure. The measured rate coefficient ratio,  $k(O_3 + \beta\text{-caryophyllene})/k(O_3 + 2,3\text{-dimethyl-but-2-ene}) = (10.9 \pm 0.8)$ , is placed on an absolute basis using  $k(O_3 + 2,3\text{-dimethyl-but-2-ene}) = 1.09 \times 10^{-15} \text{ cm}^3 \text{ molecule}^{-1} \text{ s}^{-1}$  at 295 K (IUPAC, current recommendation).

#### Preferred Values

| Parameter                                              | Value                 | T/K |
|--------------------------------------------------------|-----------------------|-----|
| $k / \text{cm}^3 \text{ molecule}^{-1} \text{ s}^{-1}$ | $1.2 \times 10^{-14}$ | 298 |
| Reliability                                            |                       |     |
| $\Delta \log k$                                        | $\pm 0.15$            | 298 |

#### Comments on Preferred Values

The preferred value of the rate coefficient at 298 K is based on an average of the more precise determinations of Shu and Atkinson (1994), as favoured by the authors (see comment (b)), and the relative rate coefficient determinations of Richters et al. (2015), which are in good agreement and consistent with the approximate absolute rate coefficient determination of Richters et al. (2015). The preferred value of  $k$  is also consistent with that calculated theoretically by Nguyen et al. (2009), who predicted that the reaction has a weak negative temperature dependence near room temperature described by the expression  $k = 8.3 \times 10^{-24} T^{3.05} \exp(1082/T) \text{ cm}^3 \text{ molecule}^{-1} \text{ s}^{-1}$ , such that  $k = 9.2 \times 10^{-15} \text{ cm}^3 \text{ molecule}^{-1} \text{ s}^{-1}$  at 298 K. The lower approximate value reported by Ghalaiey et al. (2012) at 366 K was interpreted by the authors in terms of heterogeneous interferences of secondary organic aerosol (SOA) formation, leading to overestimates in previously-reported room temperature determinations. However, the more recent consistent results of Richters et al. (2015) using low reagent concentrations in the absence of SOA formation appear to disprove this hypothesis.

The reaction may proceed by initial addition of  $O_3$  to either of the endocyclic or exocyclic C=C bonds in  $\beta$ -caryophyllene. Comparison of  $k$  for the reaction of ozone with  $\beta$ -caryophyllene with that reported for the suite of oxidation products that retain the originally exocyclic C=C bond (Winterhalter et al., 2009), suggests that the reaction of  $O_3$  with  $\beta$ -caryophyllene occurs predominantly ( $\approx 99\%$ ) at the endocyclic bond. Support for this comes from the distribution of products reported in a number of studies.

The addition of O<sub>3</sub> to the endocyclic C=C bond in  $\beta$ -caryophyllene forms a “primary ozonide (POZ)”. Although minor (~1 %) formation of  $\beta$ -caryophyllene oxide has been reported (Calogirou et al., 1997; Jaoui et al., 2003), it is likely that POZ mainly decomposes to form the two carbonyl-substituted Criegee intermediates ((I) and (II)), as represented in the schematic below.

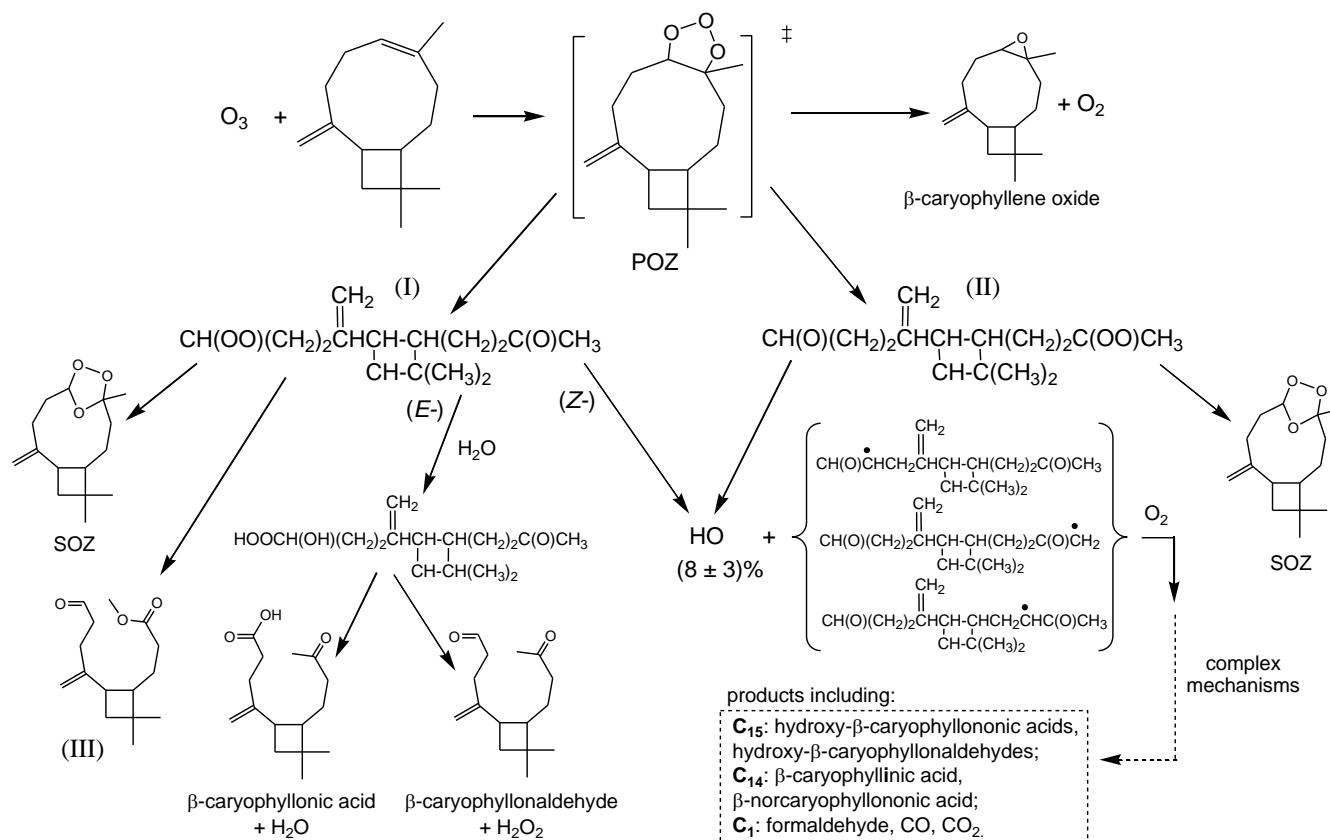

The Criegee intermediates can decompose to form HO radicals, which are expected to be formed in conjunction with a number of  $\beta$ -oxo alkenyl radicals. Comparatively low HO radical yields in the range 6 % – 10 % have been reported (Shu and Atkinson, 1994; Winterhalter et al., 2009; Jenkin et al., 2012), preferred value 8  $\pm$  3 %. The further chemistry of the  $\beta$ -oxo alkenyl radicals may form a number of reported multifunctional organic products containing hydroxy, carbonyl and acid functionalities (e.g., Calogirou et al., 1997; Jaoui et al., 2003; Kanawati et al., 2008; Winterhalter et al., 2009; Li et al., 2011), and also formaldehyde, CO and CO<sub>2</sub>, which have been reported to be formed with respective molar yields of (7.7  $\pm$  4.0) %, (2.0  $\pm$  1.8) % and (3.8  $\pm$  2.8) % by Winterhalter et al. (2009) from ozonolysis of the more reactive endocyclic double bond.

Products likely to be produced from alternative reactions of the Criegee intermediates (I) and (II) have also been detected. The formation of  $\beta$ -caryophyllon aldehyde and/or  $\beta$ -caryophyllonic acid has been positively identified in a number of studies (e.g., Calogirou et al., 1997; Kanawati et al., 2008; Winterhalter et al., 2009; Li et al., 2011; Jenkin et al., 2012), with respective molar yields of 17.3 % and 13.0 % reported by Jaoui et al. (2003) at ~80% relative humidity, in the absence of an HO scavenger. The theoretical calculations of Nguyen et al. (2009) propose an important role for a thermally-stable secondary ozonide (SOZ), which is potentially formed by ring-closure of either of the Criegee intermediates (I) and (II), and suggest it should be the dominant gas phase ozonolysis product (molar yield  $\geq$  65 %). The experimental study of Winterhalter et al. (2009) provided some qualitative support for SOZ formation, and established that its yield apparently decreases with increasing relative humidity, consistent with its formation occurring at least partially in competition with the bimolecular reactions of the Criegee intermediates with H<sub>2</sub>O. Detection of the multifunctional ester (III), which can potentially be formed from

rearrangement of (I) or (II), has also been reported by Kanawati et al. (2008) and Winterhalter et al. (2009). The CIR-TOF-MS product study of Jenkin et al. (2012) also confirmed significant collective formation of SOZ and its isomers  $\beta$ -caryophyllonic acid and the multifunctional ester (III). Further experimental quantification of product yields is clearly required, particularly in relation to formation, stability and further reaction of the secondary ozonide, SOZ.

Winterhalter et al. (2009) also determined an HO yield of  $(16.4 \pm 3.6) \%$  for bulk ozonolysis of the first-generation suite of products containing the originally exocyclic double bond. This was facilitated by their reactivity with  $O_3$  being lower than that of  $\beta$ -caryophyllene by a factor of about 100, allowing temporal separation of the oxidation steps.

## References

- Atkinson, R. and Arey, J.: Chem. Rev., 103, 4605, 2003.
- Calogirou, A., Kotzias, D., and Kettrup, A.: Atmos. Environ., 31, 283, 1997.
- Ghalaieny, M., Bacak, A., McGillen, M., Martin, D., Knights, A. V., O'Doherty, S., Shallcross, D. E. and Percival, C. J.: Phys. Chem. Chem. Phys., 14, 6596, 2012.
- Jaoui, M., Leungsakul, S., and Kamens, R. M.: J. Atmos. Chem., 45, 261, 2003.
- Jenkin, M. E., Wyche, K. P., Evans, C. J., Carr, T., Monks, P. S., Alfarra, M. R., Barley, M. H., McFiggans, G. B., Young, J. C., and Rickard, A. R.: Atmos. Chem. Phys., 12, 5275, 2012.
- Kanawati, B., Herrmann, F., Joniec, S., Winterhalter, R., and Moortgat, G. K.: Rapid Commun. Mass Spectrom., 22, 165, 2008.
- Li, Y. J., Chen, Q., Guzman, M. I., Chan, C. K., and Martin, S. T.: Atmos. Chem. Phys., 11, 121, 2011.
- Nguyen, T. L., Winterhalter, R., Moortgat, G., Kanawati, B., Peeters, J., and Vereecken, L.: Phys. Chem. Chem. Phys., 11, 4173, 2009.
- Richters, S., Herrmann, H. and Berndt, T.: Phys. Chem. Chem. Phys., 17, 11658, 2015.
- Shu, Y. and Atkinson, R.: Int. J. Chem. Kinet., 26, 1193, 1994.
- Winterhalter, R., Herrmann, F., Kanawati, B., Nguyen, T. L., Peeters, J., Vereecken, L., and Moortgat, G. K.: Phys. Chem. Chem. Phys., 11, 4152, 2009.



**Ox\_VOC33:  $\alpha$ -cedrene**

Last evaluated: August 2018; Last change in preferred values: June 2015

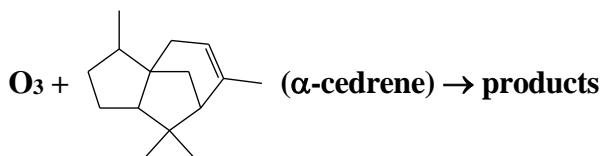**Rate coefficient data**

| $k/\text{cm}^3 \text{ molecule}^{-1} \text{ s}^{-1}$ | Temp./K     | Reference              | Technique/Comments |
|------------------------------------------------------|-------------|------------------------|--------------------|
| <i>Absolute Rate Coefficients</i>                    |             |                        |                    |
| $(2.2 \pm 0.3) \times 10^{-16}$                      | $295 \pm 2$ | Richters et al., 2015  | S-IR/UVA (a)       |
| <i>Relative Rate Coefficients</i>                    |             |                        |                    |
| $(2.87 \pm 0.85) \times 10^{-17}$                    | $296 \pm 2$ | Shu and Atkinson, 1994 | RR-GC (b),(c)      |
| $(2.90 \pm 0.14) \times 10^{-17}$                    | $296 \pm 2$ | Shu and Atkinson, 1994 | RR-GC (b),(d)      |
| $(1.4 \pm 0.9) \times 10^{-15}$                      | $366 \pm 2$ | Ghalaiey et al., 2012  | RR-GC (e)          |
| $(1.22 \pm 0.19) \times 10^{-16}$                    | $295 \pm 2$ | Richters et al., 2015  | RR-MS (f),(c)      |
| $(1.42 \pm 0.38) \times 10^{-16}$                    | $295 \pm 2$ | Richters et al., 2015  | RR-MS (f),(d)      |

 $\alpha$ -cedrene is 2,6,6,8-tetramethyl-tricyclo[5.3.1.0<sup>1,5</sup>]undec-8-ene**Comments**

- (a)  $k$  determined from the observed pseudo-first order rate of ozone decay (measured by UVA at 254 nm) in the presence of known excess concentrations of  $\alpha$ -cedrene (measured by FTIR), in stopped-flow experiments at a total pressure of  $\sim 1$  bar, with sufficient propane to scavenge  $>99\%$  of HO radicals.
- (b) The concentrations of  $\alpha$ -cedrene and 2-methyl-but-2-ene or *cis*-but-2-ene (the reference compounds), with cyclohexane to scavenge HO radicals, were monitored by GC-FID in 6400–6900 L all Teflon chambers at 740 Torr (990 mbar) pressure of purified air in the presence of  $\text{O}_3$ . The measured rate coefficient ratios,  $k(\text{O}_3 + \alpha\text{-cedrene})/k(\text{O}_3 + 2\text{-methyl-but-2-ene}) = (0.0725 \pm 0.0215)$  and  $k(\text{O}_3 + \alpha\text{-cedrene})/k(\text{O}_3 + \textit{cis-but-2-ene}) = (0.228 \pm 0.011)$ , are placed on an absolute basis using  $k(\text{O}_3 + 2\text{-methyl-but-2-ene}) = 3.96 \times 10^{-16}$  (Atkinson and Arey, 2003) and  $k(\text{O}_3 + \textit{cis-but-2-ene}) = 1.27 \times 10^{-16} \text{ cm}^3 \text{ molecule}^{-1} \text{ s}^{-1}$  (IUPAC, current recommendation) at 296 K.
- (c) Relative to 2-methyl-but-2-ene.
- (d) Relative to *cis*-but-2-ene.
- (e) The concentrations of  $\alpha$ -cedrene and 2,3-dimethyl-but-2-ene (the reference compound), with excess cyclohexane to scavenge HO radicals, were monitored by GC-FID in a 123 L Teflon-coated chamber at 780 Torr (1040 mbar) pressure of  $\text{N}_2$ , with repeated injections of  $\text{O}_3/\text{O}_2$ . The measured rate coefficient ratio,  $k(\text{O}_3 + \alpha\text{-cedrene})/k(\text{O}_3 + 2,3\text{-dimethyl-but-2-ene}) = 1.08$ , is placed on an absolute basis using  $k(\text{O}_3 + 2,3\text{-dimethyl-but-2-ene}) = 1.32 \times 10^{-15} \text{ cm}^3 \text{ molecule}^{-1} \text{ s}^{-1}$  at 366 K (IUPAC, current recommendation). It is noted that the authors used a much lower value of  $k(\text{O}_3 + 2,3\text{-dimethyl-but-2-ene}) = 2.89 \times 10^{-17} \text{ cm}^3 \text{ molecule}^{-1} \text{ s}^{-1}$ , based on a relative rate measurement reported in the same study, leading to a reported value of  $k = (3.1 \pm 1.9) \times 10^{-17} \text{ cm}^3 \text{ molecule}^{-1} \text{ s}^{-1}$  at 366 K.
- (f) The concentrations of  $\alpha$ -cedrene and 2-methyl-but-2-ene or *cis*-but-2-ene (the reference compounds), with propane to scavenge HO radicals, were monitored by PTR-MS in a flow tube at atmospheric pressure. The measured rate coefficient ratios,  $k(\text{O}_3 + \alpha\text{-cedrene})/k(\text{O}_3 + 2\text{-methyl-but-2-ene}) =$

( $0.310 \pm 0.006$ ) and  $k(\text{O}_3 + \alpha\text{-cedrene})/k(\text{O}_3 + \text{cis-but-2-ene}) = (1.13 \pm 0.01)$ , are placed on an absolute basis using  $k(\text{O}_3 + 2\text{-methyl-but-2-ene}) = 3.92 \times 10^{-16}$  (Atkinson and Arey, 2003) and  $k(\text{O}_3 + \text{cis-but-2-ene}) = 1.26 \times 10^{-16} \text{ cm}^3 \text{ molecule}^{-1} \text{ s}^{-1}$  (IUPAC, current recommendation) at 295 K.

## Preferred Values

No recommendation

### Comments on Preferred Values

The studies tabulated above provide evidence that the reaction of  $\text{O}_3$  with  $\alpha$ -cedrene occurs, and that  $k$  is sufficiently high that the reaction will contribute to  $\alpha$ -cedrene removal under atmospheric conditions. However, the level of disagreement in the reported values of  $k$  precludes recommendation of a preferred value. Further kinetics studies are required to allow the current discrepancies to be explained or reconciled.

The addition of  $\text{O}_3$  to the C=C bond in  $\alpha$ -cedrene forms a “primary ozonide (POZ)”. Although minor ( $\sim 0.1\%$ ) formation of  $\alpha$ -cedrene oxide has been reported (Jaoui et al., 2004), it is likely that POZ mainly decomposes to form the two carbonyl-substituted Criegee intermediates ((I) and (II)), as represented in the schematic below.

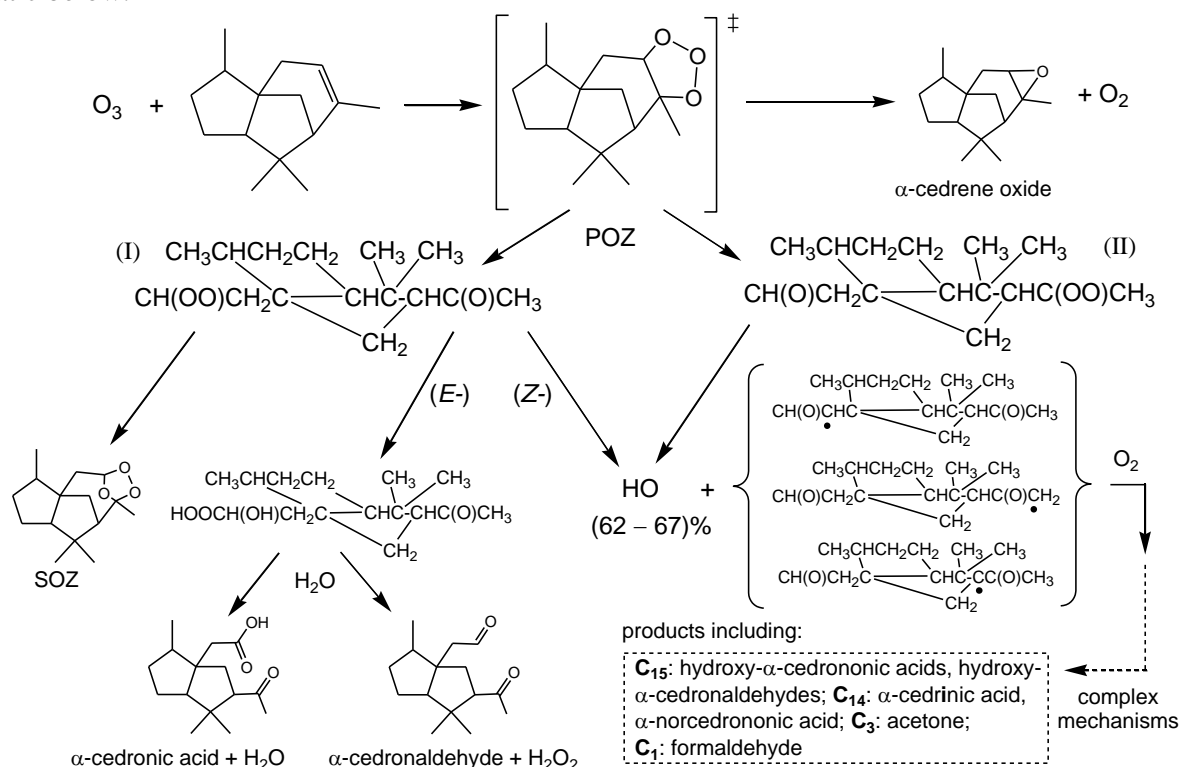

Criegee intermediates (II) and the Z-conformer of (I) can decompose to form HO radicals, which are expected to be formed in conjunction with a number of  $\beta$ -oxo alkyl radicals, as shown in the schematic. HO radical yields of  $67^{+34}_{-22}\%$  and  $62.4 \pm 4.9\%$  have been reported Shu and Atkinson (1994) and Yao et al. (2014), preferred value  $65 \pm 5\%$ . The latter study reported a large decrease to  $(9.0 \pm 1.6)\%$  when either  $\text{CH}_3\text{C}(\text{O})\text{OH}$  or  $\text{SO}_2$  were added to scavenge stabilized Criegee intermediates. The further chemistry of the  $\beta$ -oxo alkyl radicals may form a number of reported multifunctional organic products containing hydroxy, carbonyl and acid functionalities (e.g., Jaoui et al., 2004; Yao et al., 2014), and also acetone and formaldehyde which have been reported to be formed by Jaoui et al. (2004).

Products likely to be produced from alternative reactions of the Criegee intermediates (I) and (II) have also been detected. The formation of  $\alpha$ -cedronaldehyde has been positively identified by Jaoui et al. (2004) and Yao et al. (2014), potentially formed from the reaction of (I) with H<sub>2</sub>O. Jaoui et al. (2004) also detected  $\alpha$ -cedronic acid as a possible alternative product of this reaction, although this was not confirmed by Yao et al. (2014). A thermally-stable secondary ozonide (SOZ), which can be formed by ring-closure of either of the Criegee intermediates (I) and (II), was reported as the major gas phase product of  $\alpha$ -cedrene ozonolysis by Yao et al. (2014).

## References

- Atkinson, R. and Arey, J.: Chem. Rev., 103, 4605, 2003.
- Ghalaieny, M., Bacak, A., McGillen, M., Martin, D., Knights, A. V., O'Doherty, S., Shallcross, D. E. and Percival, C. J.: Phys. Chem. Chem. Phys., 14, 6596, 2012.
- Jaoui, M., Sexton, K. G., and Kamens, R. M.: Atmos. Environ., 38, 2709, 2004.
- Richters, S., Herrmann, H. and Berndt, T.: Phys. Chem. Chem. Phys., 17, 11658, 2015.
- Shu, Y. and Atkinson, R.: Int. J. Chem. Kinet., 26, 1193, 1994.
- Yao, L., Ma, Y., Wang, L., Zheng, J., Khalizov, A., Chen, M., Zhou, Y., Qi, L., and Cui, F.: Atmos. Environ., 94, 448, 2014.

**Ox\_VOC34:  $\alpha$ -copaene**

Last evaluated: August 2018; Last change in preferred values: June 2015

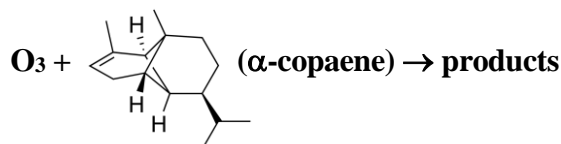**Rate coefficient data**

| $k/\text{cm}^3 \text{ molecule}^{-1} \text{ s}^{-1}$                                                     | Temp./K     | Reference              | Technique/Comments |
|----------------------------------------------------------------------------------------------------------|-------------|------------------------|--------------------|
| <i>Relative Rate Coefficients</i>                                                                        |             |                        |                    |
| $(1.50 \pm 0.06) \times 10^{-16}$                                                                        | $296 \pm 2$ | Shu and Atkinson, 1994 | RR-GC (a)          |
| $\alpha$ -copaene is (1R,2S,6S,7S,8S)-8-isopropyl-1,3-dimethyltricyclo[4.4.0.0 <sup>2,7</sup> ]dec-3-ene |             |                        |                    |

**Comments**

- (a) The concentrations of  $\alpha$ -copaene and 2-methyl-but-2-ene (the reference compound), with cyclohexane to scavenge HO radicals, were monitored by GC-FID in 6400–6900 L all Teflon chambers at 740 Torr (990 mbar) pressure of purified air in the presence of  $\text{O}_3$ . The measured rate coefficient ratio,  $k(\text{O}_3 + \alpha\text{-copaene})/k(\text{O}_3 + 2\text{-methyl-but-2-ene}) = (0.378 \pm 0.016)$ , is placed on an absolute basis using  $k(\text{O}_3 + 2\text{-methyl-but-2-ene}) = 3.96 \times 10^{-16} \text{ cm}^3 \text{ molecule}^{-1} \text{ s}^{-1}$  at 296 K (Atkinson and Arey, 2003).

**Preferred Values**

| Parameter                                            | Value                 | T/K |
|------------------------------------------------------|-----------------------|-----|
| $k/\text{cm}^3 \text{ molecule}^{-1} \text{ s}^{-1}$ | $1.5 \times 10^{-16}$ | 298 |
| <i>Reliability</i>                                   |                       |     |
| $\Delta \log k$                                      | $\pm 0.3$             | 298 |

**Comments on Preferred Values**

The preferred value of the rate coefficient at 298 K is based on the determination of Shu and Atkinson (1994), with the uncertainty limits reflecting that this is the only reported study. Confirmatory measurements are required.

There has been only limited product and mechanistic information reported in the literature. Shu and Atkinson (1994) reported a yield of HO radicals of  $(35^{+18}_{-12})\%$ ; and the studies of Dekermenjian et al. (1999) and Reinnig et al. (2009) provided information on the functional group content of secondary organic aerosol (SOA) formed from  $\alpha$ -copaene ozonolysis. The mechanism is expected to proceed via addition of  $\text{O}_3$  to the C=C bond, with the subsequent mechanism following the general framework outlined in the datasheets for other mono- and sesquiterpenes possessing endocyclic C=C bonds (e.g.  $\alpha$ -cedrene).

## References

- Atkinson, R. and Arey, J.: Chem. Rev., 103, 4605, 2003.
- Dekermenjian, M., Allen, D. T., Atkinson, R., and Arey, J.: Aerosol Sci. Technol., 30, 349, 1999.
- Reinnig, M.-C., Warnke, J., and Hoffmann, T.: Rapid Commun. Mass Spectrom., 23,1735, 2009.
- Shu, Y. and Atkinson, R.: Int. J. Chem. Kinet., 26, 1193, 1994.

**Ox\_VOC35:  $\alpha$ -farnesene**

Last evaluated: August 2018; Last change in preferred values: June 2015

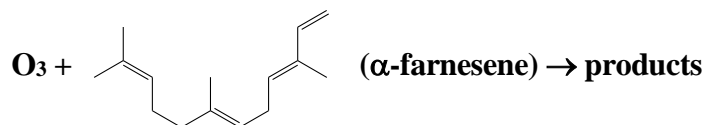**Rate coefficient data**

| $k/\text{cm}^3 \text{ molecule}^{-1} \text{ s}^{-1}$ | Temp./K | Reference        | Technique/Comments |
|------------------------------------------------------|---------|------------------|--------------------|
| <i>Relative Rate Coefficients</i>                    |         |                  |                    |
| $3.50 \times 10^{-12} \exp[-(2590 \pm 393)/T]$       | 298-318 | Kim et al., 2011 | RR-MS (a)          |
| $(5.88^{+1.78}_{-1.37}) \times 10^{-16}$             | 298     |                  |                    |

 $\alpha$ -farnesene is 3,7,11-trimethyl-dodeca-1,3,6,10-tetraene**Comments**

- (a) The concentrations of  $\alpha$ -farnesene and *trans*-but-2-ene (the reference compound) were monitored by MS in reacting  $\text{O}_3$  -  $\alpha$ -farnesene - *trans*-but-2-ene - acetaldehyde - He mixtures in a 160 cm<sup>3</sup> volume quartz vessel at ~1 bar pressure, with acetaldehyde being present to scavenge HO radicals. The measured rate coefficient ratios,  $k(\text{O}_3 + \alpha\text{-farnesene})/k(\text{O}_3 + \text{trans-but-2-ene})$ , are placed on an absolute basis using  $k(\text{O}_3 + \text{trans-but-2-ene}) = 6.6 \times 10^{-15} \exp(-1060/T) \text{ cm}^3 \text{ molecule}^{-1} \text{ s}^{-1}$  (IUPAC, current recommendation).

**Preferred Values**

| Parameter                                            | Value                               | T/K     |
|------------------------------------------------------|-------------------------------------|---------|
| $k/\text{cm}^3 \text{ molecule}^{-1} \text{ s}^{-1}$ | $5.9 \times 10^{-16}$               | 298     |
| $k/\text{cm}^3 \text{ molecule}^{-1} \text{ s}^{-1}$ | $3.5 \times 10^{-12} \exp(-2590/T)$ | 290-320 |
| <i>Reliability</i>                                   |                                     |         |
| $\Delta \log k$                                      | $\pm 0.3$                           | 298     |
| $\Delta E/R$                                         | $\pm 500$                           | 290-320 |

**Comments on Preferred Values**

The preferred values of  $k$  are based on the temperature dependence expression of Kim et al. (2011), the only reported investigation of the reaction. Confirmatory studies are required.

There have currently been no reported product or mechanistic investigations, and such studies are also required. However, structure-activity methods based on a summation of the rate coefficients for simple alkene and diene structures (e.g. Calvert et al., 2000) suggest that the reaction should proceed mainly via  $\text{O}_3$  addition to the two non-conjugated methyl-substituted C=C bonds with about equal probability at 298 K, as has been reported for the structurally similar sesquiterpene,  $\beta$ -farnesene, by Kourtchev et al. (2009) (see data sheet Ox\_VOC36).

## References

- Calvert, J. G., Atkinson, R., Kerr, J. A., Madronich, S., Moortgat, G. K., Wallington, T. J., and Yarwood, G.: The mechanisms of atmospheric oxidation of alkenes, Oxford University Press, New York, ISBN 0-19-513177-0, 2000.
- Kim, D., Stevens, P. S. and Hites, R. A.: J. Phys. Chem. A, 115, 500, 2011.
- Kourtchev, I., Bejan, I, Sodeau, J. R., and Wenger, J. C: Atmos. Environ., 43, 3182, 2009.

**Ox\_VOC36:  $\beta$ -farnesene**

Last evaluated: August 2018; Last change in preferred values: June 2015

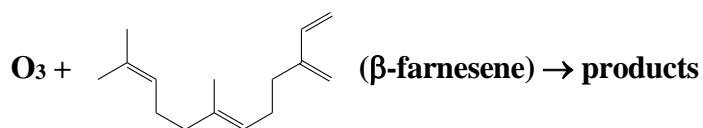**Rate coefficient data**

| $k/\text{cm}^3 \text{ molecule}^{-1} \text{ s}^{-1}$ | Temp./K     | Reference              | Technique/Comments |
|------------------------------------------------------|-------------|------------------------|--------------------|
| <i>Relative Rate Coefficients</i>                    |             |                        |                    |
| $(4.12 \pm 0.17) \times 10^{-16}$                    | $296 \pm 2$ | Kourtchev et al., 2009 | RR-FTIR (a),(b)    |
| $(4.01 \pm 0.12) \times 10^{-16}$                    | $296 \pm 2$ | Kourtchev et al., 2009 | RR-FTIR (a),(c)    |
| $(4.19 \pm 0.11) \times 10^{-16}$                    | $296 \pm 2$ | Kourtchev et al., 2009 | RR-FTIR (a),(d)    |
| $1.80 \times 10^{-12} \exp[-(2348 \pm 329)/T]$       | 298-318     | Kim et al., 2011       | RR-MS (e)          |
| $(6.81^{+1.70}_{-1.36}) \times 10^{-16}$             | 298         |                        |                    |

 $\beta$ -farnesene is (6E)-7,11-dimethyl-3-methylene-1,6,10-dodecatriene**Comments**

- (a) The concentrations of *trans*- $\beta$ -farnesene and cycloocta-1,5-diene, *cis*-cyclooctene or  $\gamma$ -terpinene (the reference compounds), with carbon monoxide to scavenge HO radicals, were monitored by long path FTIR in a 3.91 m<sup>3</sup> FEP chamber at 0.1–1 mbar above atmospheric pressure of purified air in the presence of O<sub>3</sub>. The measured rate coefficient ratios,  $k(\text{O}_3 + \textit{trans}\text{-}\beta\text{-farnesene})/k(\text{O}_3 + \text{cycloocta-1,5-diene}) = (2.71 \pm 0.11)$ ,  $k(\text{O}_3 + \textit{trans}\text{-}\beta\text{-farnesene})/k(\text{O}_3 + \textit{cis}\text{-cyclooctene}) = (1.04 \pm 0.03)$  and  $k(\text{O}_3 + \textit{trans}\text{-}\beta\text{-farnesene})/k(\text{O}_3 + \gamma\text{-terpinene}) = (2.79 \pm 0.07)$ , are placed on an absolute basis using  $k(\text{O}_3 + \text{cycloocta-1,5-diene}) = 1.52 \times 10^{-16} \text{ cm}^3 \text{ molecule}^{-1} \text{ s}^{-1}$ ,  $k(\text{O}_3 + \textit{cis}\text{-cyclooctene}) = 3.86 \times 10^{-16} \text{ cm}^3 \text{ molecule}^{-1} \text{ s}^{-1}$  (Cuisick and Atkinson, 2005) and  $k(\text{O}_3 + \gamma\text{-terpinene}) = 1.5 \times 10^{-16} \text{ cm}^3 \text{ molecule}^{-1} \text{ s}^{-1}$  (IUPAC current recommendation) at 296 K. Gas phase carbonyl products were also identified as O-(2,3,4,5,6-pentafluorobenzyl)-hydroxylamine derivatives (GC-MS), following collection on denuders.
- (b) Relative to cycloocta-1,5-diene.
- (c) Relative to *cis*-cyclooctene.
- (d) Relative to  $\gamma$ -terpinene.
- (e) The concentrations of  $\beta$ -farnesene and *trans*-but-2-ene (the reference compound) were monitored by MS in reacting O<sub>3</sub> -  $\beta$ -farnesene - *trans*-but-2-ene - acetaldehyde - He mixtures in a 160 cm<sup>3</sup> volume quartz vessel at ~1 bar pressure, with acetaldehyde being present to scavenge HO radicals. The measured rate coefficient ratios,  $k(\text{O}_3 + \beta\text{-farnesene})/k(\text{O}_3 + \textit{trans}\text{-but-2-ene})$ , are placed on an absolute basis using  $k(\text{O}_3 + \textit{trans}\text{-but-2-ene}) = 6.6 \times 10^{-15} \exp(-1060/T) \text{ cm}^3 \text{ molecule}^{-1} \text{ s}^{-1}$  (IUPAC, current recommendation).



### Preferred Values

| Parameter                                              | Value                               | T/K     |
|--------------------------------------------------------|-------------------------------------|---------|
| $k / \text{cm}^3 \text{ molecule}^{-1} \text{ s}^{-1}$ | $5.6 \times 10^{-16}$               | 298     |
| $k / \text{cm}^3 \text{ molecule}^{-1} \text{ s}^{-1}$ | $1.5 \times 10^{-12} \exp(-2350/T)$ | 290-320 |
| <i>Reliability</i>                                     |                                     |         |
| $\Delta \log k$                                        | $\pm 0.25$                          | 298     |
| $\Delta E/R$                                           | $\pm 500$                           | 290-320 |

#### Comments on Preferred Values

The preferred value of  $E/R$  is based on the sole temperature dependence study of Kim et al. (2011). The preferred 298 K rate coefficient is an average of those of Kourtchev et al. (2009) (corrected to 298 K using the preferred temperature dependence) and Kim et al. (2011), which are in reasonable agreement. The pre-exponential factor is adjusted to fit the 298 K preferred value. Confirmatory studies of the temperature dependence are required.

Structure-activity methods based on a summation of the rate coefficients for simple alkene and diene structures (e.g. Calvert et al., 2000) predict a rate coefficient that agrees with the preferred value to within a factor of 1.5. These methods also predict that the reaction should proceed mainly via  $\text{O}_3$  addition to the two non-conjugated methyl-substituted  $\text{C}=\text{C}$  bonds ("a" and "b") with about equal probability at 298 K. Some support for this has been provided by the product study of Kourtchev et al. (2009), who detected the formation of the corresponding primary carbonyl products (acetone, (*E*)-4-methyl-8-methylenedeca-4,9-dienal, 4-methylenehex-5-enal, 6-methylhept-5-en-2-one), as shown below.

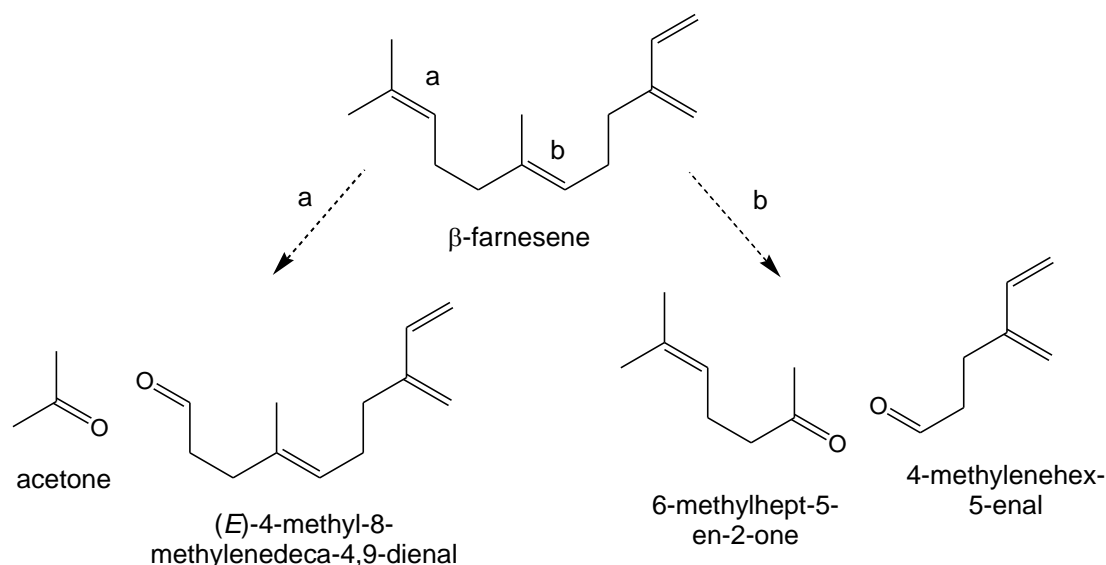

Kourtchev et al. (2009) also reported detection of 4-oxopentanal, which may be formed from the secondary ozonolysis of both (*E*)-4-methyl-8-methylenedeca-4,9-dienal and 6-methylhept-5-en-2-one; and methylglyoxal, which may be formed from reactions of the Criegee intermediate  $(\text{CH}_3)_2\text{COO}$ , the expected initial co-product of (*E*)-4-methyl-8-methylenedeca-4,9-dienal. Further product and mechanistic studies are required.

## References

- Calvert, J. G., Atkinson, R., Kerr, J. A., Madronich, S., Moortgat, G. K., Wallington, T. J., and Yarwood, G.: The mechanisms of atmospheric oxidation of alkenes, Oxford University Press, New York, ISBN 0-19-513177-0, 2000.
- Cusick, R. D. and Atkinson, R.: Int. J. Chem. Kinet., 37, 183, 2005.
- Kim, D., Stevens, P. S. and Hites, R. A.: J. Phys. Chem. A, 115, 500, 2011.
- Kourtchev, I., Bejan, I., Sodeau, J. R., and Wenger, J. C: Atmos. Environ., 43, 3182, 2009.

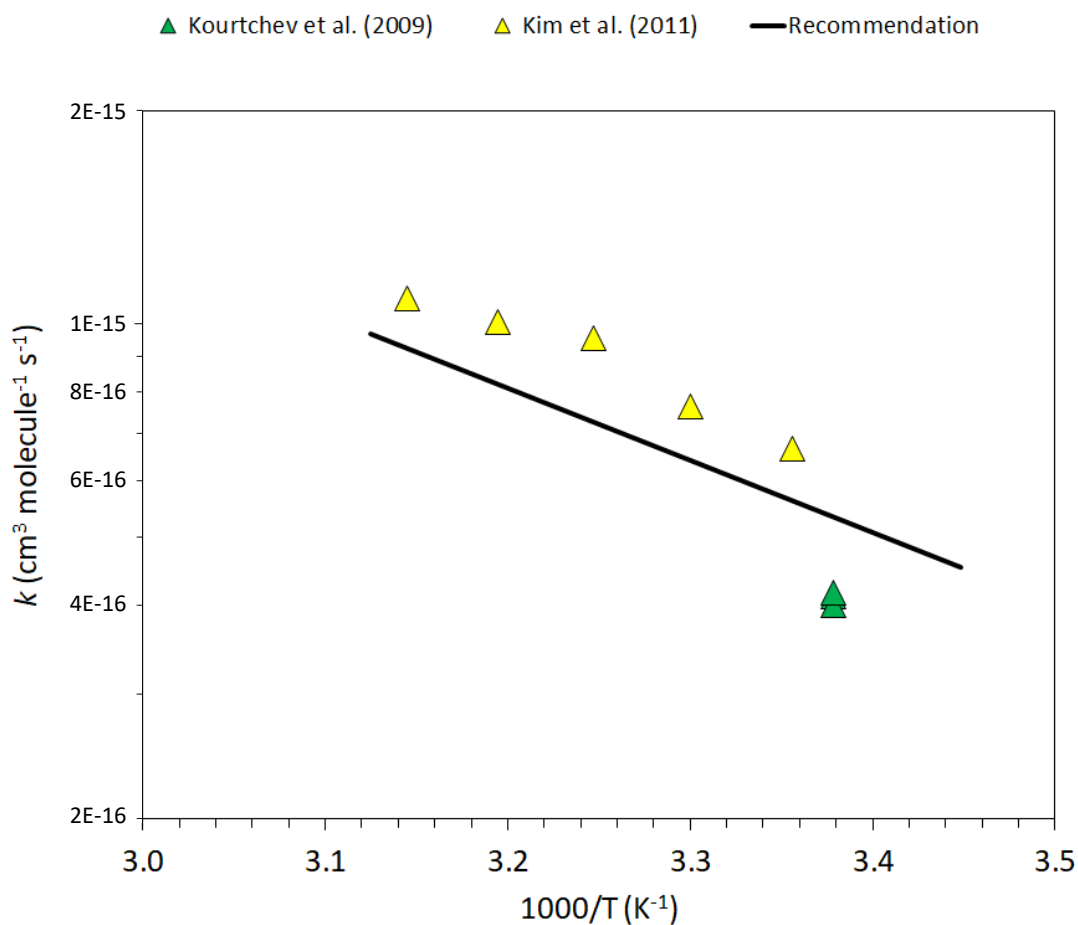

**Ox\_VOC37:  $\alpha$ -humulene**

Data sheet Ox\_VOC37;

Last evaluated: August 2018; Last change in preferred values: June 2015

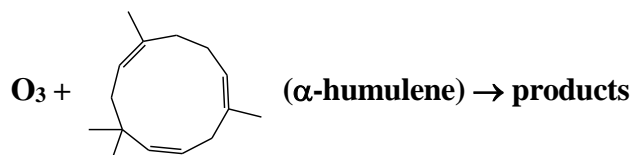**Rate coefficient data**

| $k/\text{cm}^3 \text{ molecule}^{-1} \text{ s}^{-1}$ | Temp./K     | Reference              | Technique/<br>Comments |
|------------------------------------------------------|-------------|------------------------|------------------------|
| <i>Relative Rate Coefficients</i>                    |             |                        |                        |
| $(1.12 \pm 0.17) \times 10^{-14}$                    | $296 \pm 2$ | Shu and Atkinson, 1994 | RR-GC (a),(b)          |
| $(1.07 \pm 0.08) \times 10^{-14}$                    | $296 \pm 2$ | Shu and Atkinson, 1994 | RR-GC (a),(c)          |
| $(2.9 \pm 1.9) \times 10^{-15}$                      | $366 \pm 2$ | Ghalaieny et al., 2012 | RR-GC (d)              |
| $(1.28 \pm 0.35) \times 10^{-14}$                    | $295 \pm 2$ | Richters et al., 2015  | RR-GC-MS (e)           |
| $(1.43 \pm 0.24) \times 10^{-14}$                    | $295 \pm 2$ | Richters et al., 2015  | RR-MS (f)              |

 $\alpha$ -humulene is 2,6,6,9-tetramethyl-1,4,8-cycloundecatriene**Comments**

- (a) The concentrations of  $\alpha$ -humulene and 2,3-dimethyl-but-2-ene or terpinolene (the reference compounds), with cyclohexane to scavenge HO radicals, were monitored by GC-FID in 6400–6900 L all Teflon chambers at 740 Torr (990 mbar) pressure of purified air in the presence of  $\text{O}_3$ . The measured rate coefficient ratios,  $k(\text{O}_3 + \alpha\text{-humulene})/k(\text{O}_3 + 2,3\text{-dimethyl-but-2-ene}) = (10.3 \pm 1.6)$  and  $k(\alpha\text{-humulene})/k(\text{O}_3 + \text{terpinolene}) = (0.564 \pm 0.043)$ , are placed on an absolute basis using  $k(\text{O}_3 + 2,3\text{-dimethyl-but-2-ene}) = 1.09 \times 10^{-15} \text{ cm}^3 \text{ molecule}^{-1} \text{ s}^{-1}$  at 296 K; and  $k(\text{O}_3 + \text{terpinolene}) = 1.6 \times 10^{-15} \text{ cm}^3 \text{ molecule}^{-1} \text{ s}^{-1}$  (IUPAC, current recommendations).
- (b) Relative to 2,3-dimethyl-but-2-ene.
- (c) Relative to terpinolene.
- (d) The concentrations of  $\alpha$ -humulene and 2,3-dimethyl-but-2-ene (the reference compound), with excess cyclohexane to scavenge HO radicals, were monitored by GC-FID in a 123 L Teflon-coated chamber at 780 Torr (1040 mbar) pressure of  $\text{N}_2$ , with repeated injections of  $\text{O}_3/\text{O}_2$ . The measured rate coefficient ratio,  $k(\text{O}_3 + \alpha\text{-humulene})/k(\text{O}_3 + 2,3\text{-dimethyl-but-2-ene}) = 2.2$ , is placed on an absolute basis using  $k(\text{O}_3 + 2,3\text{-dimethyl-but-2-ene}) = 1.32 \times 10^{-15} \text{ cm}^3 \text{ molecule}^{-1} \text{ s}^{-1}$  at 366 K (IUPAC, current recommendation). It is noted that the authors used a much lower value of  $k(\text{O}_3 + 2,3\text{-dimethyl-but-2-ene}) = 2.89 \times 10^{-17} \text{ cm}^3 \text{ molecule}^{-1} \text{ s}^{-1}$ , based on a relative rate measurement reported in the same study, leading to a reported value of  $k = (6.4 \pm 4.2) \times 10^{-17} \text{ cm}^3 \text{ molecule}^{-1} \text{ s}^{-1}$  at 366 K.
- (e) The concentrations of  $\alpha$ -humulene and  $\alpha$ -terpinene (the reference compound), with 2-methylpropene to scavenge HO radicals, were monitored by GC-MS in a flow tube at atmospheric pressure. The measured rate coefficient ratio,  $k(\text{O}_3 + \alpha\text{-humulene})/k(\text{O}_3 + \alpha\text{-terpinene}) = (0.75 \pm 0.04)$ , is placed on an absolute basis using  $k(\text{O}_3 + \alpha\text{-terpinene}) = 1.9 \times 10^{-14} \text{ cm}^3 \text{ molecule}^{-1} \text{ s}^{-1}$  (IUPAC, current recommendation).

- (f) The concentrations of  $\alpha$ -humulene and 2,3-dimethyl-but-2-ene (the reference compound), with propane to scavenge HO radicals, were monitored by PTR-MS in a flow tube at atmospheric pressure. The measured rate coefficient ratio,  $k(\text{O}_3 + \alpha\text{-humulene})/k(\text{O}_3 + 2,3\text{-dimethyl-but-2-ene}) = (11.7 \pm 0.8)$ , is placed on an absolute basis using  $k(\text{O}_3 + 2,3\text{-dimethyl-but-2-ene}) = 1.09 \times 10^{-15} \text{ cm}^3 \text{ molecule}^{-1} \text{ s}^{-1}$  at 295 K (IUPAC, current recommendation).

#### Preferred Values

| Parameter                                              | Value                 | T/K |
|--------------------------------------------------------|-----------------------|-----|
| $k / \text{cm}^3 \text{ molecule}^{-1} \text{ s}^{-1}$ | $1.2 \times 10^{-14}$ | 298 |
| <i>Reliability</i>                                     |                       |     |
| $\Delta \log k$                                        | $\pm 0.15$            | 298 |

#### Comments on Preferred Values

The preferred value of the rate coefficient at 298 K is based on an average of the relative rate determinations of Shu and Atkinson (1994) and Richters et al. (2015), which are in good agreement. The lower approximate value reported by Ghalaieny et al. (2012) at 366 K was interpreted by the authors in terms of heterogeneous interferences of secondary organic aerosol (SOA) formation, leading to overestimates in previously-reported room temperature determinations. However, the more recent consistent results of Richters et al. (2015) using low reagent concentrations in the absence of SOA formation appear to disprove this hypothesis.

The reaction potentially proceeds by initial addition of  $\text{O}_3$  to any of the three endocyclic C=C bonds in  $\alpha$ -humulene, although there have been no studies from which the attack distribution can be elucidated. Structure-activity methods based on a summation of the rate coefficients for simple alkene structures (e.g. Calvert et al., 2000) suggest that addition at all sites is likely to be competitive, with the methyl-substituted C=C bonds being more favoured. However, such methods also underestimate the observed value of  $k$  by an order of magnitude, suggesting a general elevating influence of ring strain on reactivity with  $\text{O}_3$ . It is therefore not currently possible to draw firm conclusions about the attack distribution of  $\text{O}_3$  at the three C=C bonds in  $\alpha$ -humulene.

The initial addition of  $\text{O}_3$  is expected to form a set of three “primary ozonides”, which rapidly decompose via ring-opening to form six carbonyl-substituted Criegee intermediates. The Criegee intermediates can decompose to form HO radicals, which are expected to be formed in conjunction with a number of  $\beta$ -oxo dialkenyl radicals. Comparatively low HO radical yields of  $(22^{+11}_{-7})\%$  and  $(10.5 \pm 0.7)\%$  have been reported by Shu and Atkinson (1994) and Beck et al. (2011), respectively. The further chemistry of the  $\beta$ -oxo dialkenyl co-radicals may form a large number of multifunctional organic products containing hydroxy, carbonyl and acid functionalities, some of which have been reported by Beck et al. (2011); and also formaldehyde and acetone, which have been reported to be formed with respective molar yields of  $(3.5 \pm 1.1)\%$  and  $(1.2 \pm 0.4)\%$  by Lee et al. (2006). Organic products likely to be produced from alternative reactions of the Criegee intermediates (e.g.  $\text{C}_{15}$  dicarbonyls and oxo-carboxylic acids from the reactions with  $\text{H}_2\text{O}$ ) have also been detected, in addition to one or more “secondary ozonides” formed by intramolecular ring-closure of the Criegee intermediates (Beck et al., 2011).

Beck et al. (2011) also characterized the bulk reactivity of  $\text{O}_3$  with the suites of first-generation products (containing two C=C bonds) and second generation products (containing one C=C bond), which were found to be lower than that of  $\alpha$ -humulene by respective factors of about 30 and 400. The temporal separation of the oxidation steps allowed detected products to be attributed to the different generations of oxidation. An HO yield of  $(12.9 \pm 0.7)\%$  was also determined for bulk ozonolysis of the first-generation suite of products.

## References

- Beck, M., Winterhalter, R., Herrmann, F., and Moortgat, G. K.: Phys. Chem. Chem. Phys., 13, 10970, 2011.
- Ghalaieny, M., Bacak, A., McGillen, M., Martin, D., Knights, A. V., O'Doherty, S., Shallcross, D. E. and Percival, C. J.: Phys. Chem. Chem. Phys., 14, 6596, 2012.
- Lee, A., Goldstein, A. H., Keywood, M. D., Gao, S., Varutbangkul, V., Bahreini, R., Ng, N. L., Flagan, R. C., and Seinfeld, J. H.: J. Geophys. Res., 111, D07302, doi:10.1029/2005JD006437, 2006.
- Richters, S., Herrmann, H. and Berndt, T.: Phys. Chem. Chem. Phys., 17, 11658, 2015.
- Shu, Y. and Atkinson, R.: Int. J. Chem. Kinet., 26, 1193, 1994.

**Ox\_VOC38: isolongifolene**

Last evaluated: August 2018; Last change in preferred values: June 2015

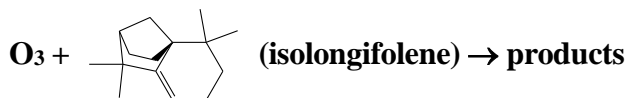**Rate coefficient data**

| $k/\text{cm}^3 \text{ molecule}^{-1} \text{ s}^{-1}$ | Temp./K     | Reference              | Technique/Comments |
|------------------------------------------------------|-------------|------------------------|--------------------|
| <i>Absolute Rate Coefficients</i>                    |             |                        |                    |
| $(8.8 \pm 0.8) \times 10^{-18}$                      | $295 \pm 2$ | Richters et al., 2015  | S-IR/UVA (a)       |
| <i>Relative Rate Coefficients</i>                    |             |                        |                    |
| $(1.1 \pm 0.5) \times 10^{-15}$                      | $366 \pm 2$ | Ghalaieny et al., 2012 | RR-GC (b)          |
| $(1.57 \pm 0.29) \times 10^{-17}$                    | $295 \pm 2$ | Richters et al., 2015  | RR-MS (c)          |
| $(7.56 \pm 0.21) \times 10^{-18}$                    | $295 \pm 2$ | Richters et al., 2015  | RR-MS (d)          |

isolongifolene is (1R)-2,2,7,7-tetramethyltricyclo[6.2.1.0<sup>1,6</sup>]undec-5-ene

**Comments**

- (a)  $k$  determined from the observed pseudo-first order rate of ozone decay (measured by UVA at 254 nm) in the presence of known excess concentrations of isolongifolene (measured by FTIR), in stopped-flow experiments at a total pressure of  $\sim 1$  bar, with sufficient propane to scavenge  $>99\%$  of HO radicals.
- (b) The concentrations of isolongifolene and 2,3-dimethyl-but-2-ene (the reference compound), with excess cyclohexane to scavenge HO radicals, were monitored by GC-FID in a 123 L Teflon-coated chamber at 780 Torr (1040 mbar) pressure of  $\text{N}_2$ , with repeated injections of  $\text{O}_3/\text{O}_2$ . The measured rate coefficient ratio,  $k(\text{O}_3 + \text{isolongifolene})/k(\text{O}_3 + 2,3\text{-dimethyl-but-2-ene}) = 0.87$ , is placed on an absolute basis using  $k(\text{O}_3 + 2,3\text{-dimethyl-but-2-ene}) = 1.32 \times 10^{-15} \text{ cm}^3 \text{ molecule}^{-1} \text{ s}^{-1}$  at 366 K (IUPAC, current recommendation). It is noted that the authors used a much lower value of  $k(\text{O}_3 + 2,3\text{-dimethyl-but-2-ene}) = 2.89 \times 10^{-17} \text{ cm}^3 \text{ molecule}^{-1} \text{ s}^{-1}$ , based on a relative rate measurement reported in the same study, leading to a reported value of  $k = (2.5 \pm 1.1) \times 10^{-17} \text{ cm}^3 \text{ molecule}^{-1} \text{ s}^{-1}$  at 366 K.
- (c) The concentrations of isolongifolene and 2-methyl-but-2-ene (the reference compound), with propane to scavenge HO radicals, were monitored by PTR-MS in a flow tube at atmospheric pressure. The measured rate coefficient ratio,  $k(\text{O}_3 + \text{isolongifolene})/k(\text{O}_3 + 2\text{-methyl-but-2-ene}) = (0.040 \pm 0.004)$ , is placed on an absolute basis using  $k(\text{O}_3 + 2\text{-methyl-but-2-ene}) = 3.92 \times 10^{-16} \text{ cm}^3 \text{ molecule}^{-1} \text{ s}^{-1}$  at 295 K (Atkinson and Arey, 2003).
- (d) The concentrations of isolongifolene and *cis*-but-2-ene (the reference compound), with propane to scavenge HO radicals, were monitored by PTR-MS in a flow tube at atmospheric pressure. The measured rate coefficient ratio,  $k(\text{O}_3 + \text{isolongifolene})/k(\text{O}_3 + \text{cis-but-2-ene}) = (0.060 \pm 0.004)$ , is placed on an absolute basis using  $k(\text{O}_3 + \text{cis-but-2-ene}) = 1.26 \times 10^{-16} \text{ cm}^3 \text{ molecule}^{-1} \text{ s}^{-1}$  at 295 K (IUPAC, current recommendation).

### Preferred Values

| Parameter                                              | Value                 | T/K |
|--------------------------------------------------------|-----------------------|-----|
| $k / \text{cm}^3 \text{ molecule}^{-1} \text{ s}^{-1}$ | $1.0 \times 10^{-17}$ | 298 |
| <i>Reliability</i>                                     |                       |     |
| $\Delta \log k$                                        | $\pm 0.3$             | 298 |

#### Comments on Preferred Values

The preferred value of the rate coefficient at 298 K is based on a rounded average of the absolute and relative rate determinations of Richters et al. (2015), with an uncertainty that encompasses the range of values. Although Ghalaieny et al. (2012) report a comparable value of  $k$  at 366 K (see comment (c)), this was apparently based on use of an anomalously low value of the rate coefficient for the reference reaction of  $\text{O}_3$  with 2,3-dimethyl-but-2-ene. The value tabulated above is based on the current IUPAC recommendation (see comment (c)), leading to a value of  $k$  (at 366 K) that is two orders of magnitude higher than the preferred value.

The reaction is expected to proceed via addition of  $\text{O}_3$  to the C=C bond, with the subsequent mechanism following the general framework outlined in the datasheets for other mono- and sesquiterpenes possessing endocyclic C=C bonds (e.g.  $\alpha$ -cedrene). However, there have apparently been no product or mechanistic studies to confirm this.

### References

- Atkinson, R. and Arey, J.: Chem. Rev., 103, 4605, 2003.  
 Ghalaieny, M., Bacak, A., McGillen, M., Martin, D., Knights, A. V., O'Doherty, S., Shallcross, D. E. and Percival, C. J.: Phys. Chem. Chem. Phys., 14, 6596, 2012.  
 Richters, S., Herrmann, H. and Berndt, T.: Phys. Chem. Chem. Phys., 17, 11658, 2015.

**Ox\_VOC39: longifolene**

Last evaluated: August 2018; Last change in preferred values: June 2015

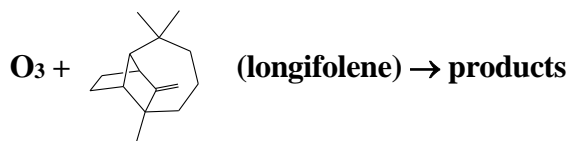**Rate coefficient data**

| $k/\text{cm}^3 \text{ molecule}^{-1} \text{ s}^{-1}$ | Temp./K     | Reference              | Technique/Comments |
|------------------------------------------------------|-------------|------------------------|--------------------|
| <i>Relative Rate Coefficients</i>                    |             |                        |                    |
| $< 6 \times 10^{-18}$                                | $296 \pm 2$ | Shu and Atkinson, 1994 | RR-GC (a),(b)      |
| $< 5 \times 10^{-19}$                                | $296 \pm 2$ | Shu and Atkinson, 1994 | RR-GC (a),(c)      |

longifolene is (1R,2S,7S,9S)-3,3,7-trimethyl-8-methylenetricyclo[5.4.0.0<sup>2,9</sup>]undecane

**Comments**

- (a) The concentrations of longifolene and *cis*-but-2-ene or propene (the reference compounds), with cyclohexane to scavenge HO radicals, were monitored by GC-FID in 6400–6900 L all Teflon chambers at 740 Torr (990 mbar) pressure of purified air in the presence of O<sub>3</sub>. The measured coefficient ratios,  $k(\text{O}_3 + \text{longifolene})/k(\text{O}_3 + \text{cis-but-2-ene})$  and  $k(\text{O}_3 + \text{longifolene})/k(\text{O}_3 + \text{propene}) < 0.05$ , are placed on an absolute basis using  $k(\text{O}_3 + \text{cis-but-2-ene}) = 1.27 \times 10^{-16} \text{ cm}^3 \text{ molecule}^{-1} \text{ s}^{-1}$  and  $k(\text{O}_3 + \text{propene}) = 1.01 \times 10^{-17} \text{ cm}^3 \text{ molecule}^{-1} \text{ s}^{-1}$  (IUPAC, current recommendation) at 296 K.
- (b) Relative to *cis*-but-2-ene.
- (c) Relative to propene.

**Preferred Values**

| Parameter                                            | Value                 | T/K |
|------------------------------------------------------|-----------------------|-----|
| $k/\text{cm}^3 \text{ molecule}^{-1} \text{ s}^{-1}$ | $< 5 \times 10^{-19}$ | 298 |

*Comments on Preferred Values*

The more stringent upper limit for the value of  $k$  reported in the study of Shu and Atkinson (1994) is adopted for the preferred value. This is based on no quantifiable decay of longifolene occurring in mixtures with O<sub>3</sub> and propene (with cyclohexane to scavenge HO radicals), for up to 75 % decay in the propene concentration. The low value of  $k$  compared to those for other terpenes possessing methylene groups (e.g.  $\beta$ -pinene and sabinene) is most likely due to steric hindrance resulting from the bridged ring structure.

**References**

Shu, Y. and Atkinson, R.: Int. J. Chem. Kinet., 26, 1193, 1994.



**Ox\_VOC40: valencene**

Last evaluated: August 2018; Last change in preferred values: June 2015

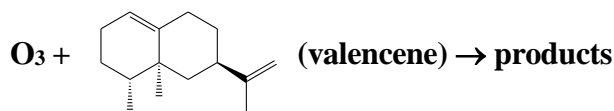**Rate coefficient data**

| $k/\text{cm}^3 \text{ molecule}^{-1} \text{ s}^{-1}$ | Temp./K     | Reference | Technique/Comments |
|------------------------------------------------------|-------------|-----------|--------------------|
| <i>Relative Rate Coefficients</i>                    |             |           |                    |
| $(4.95 \pm 1.23) \times 10^{-17}$                    | $297 \pm 3$ | Ham, 2013 | GC-MS (a),(b)      |
| $(1.25 \pm 0.32) \times 10^{-16}$                    | $297 \pm 3$ | Ham, 2013 | RR-MS (a),(c)      |

valencene is (3R,4aS,5R)-3-isopropenyl-4a,5-dimethyl-1,2,3,4,4a,5,6,7-octahydronaphthalene

**Comments**

- (a) The concentrations of valencene and 3-carene or  $\gamma$ -terpinene (the reference compounds) were monitored by GC-FID in a 100 L Teflon chamber in purified air in the presence of  $\text{O}_3$ . The measured rate coefficient ratios  $k(\text{O}_3 + \text{valencene})/k(\text{O}_3 + 3\text{-carene}) = (1.01 \pm 0.25)$  and  $k(\text{O}_3 + \text{valencene})/k(\text{O}_3 + \gamma\text{-terpinene}) = (0.78 \pm 0.20)$  are placed on an absolute basis using  $k(\text{O}_3 + 3\text{-carene}) = 4.9 \times 10^{-17} \text{ cm}^3 \text{ molecule}^{-1} \text{ s}^{-1}$  and  $k(\text{O}_3 + \gamma\text{-terpinene}) = 1.6 \times 10^{-16} \text{ cm}^3 \text{ molecule}^{-1} \text{ s}^{-1}$  (IUPAC, current recommendations).
- (b) Relative to 3-carene.
- (c) Relative to  $\gamma$ -terpinene.

**Preferred Values**

No recommendation

*Comments on Preferred Values*

The sole investigation of Ham (2013) provides evidence that the reaction of  $\text{O}_3$  with valencene occurs, and that  $k$  is likely sufficiently high that the reaction will contribute to valencene removal under atmospheric conditions. However, the level of disagreement in the two reported determinations, and inevitable complications arising from not scavenging HO radicals in the system, preclude recommendation of a preferred value. Further kinetics studies are required.

The reaction is expected to proceed via addition of  $\text{O}_3$  to both the endocyclic and exocyclic C=C bonds in valencene, with the subsequent mechanism following the general framework outlined in the datasheets for other mono- and sesquiterpenes. However, there have apparently been no product or mechanistic studies to confirm this.

**References**

Ham, J. E: Int. J. Chem. Kinet., 45, 508, 2013.

#### **A4. Abbreviations used in data sheets**

A – absorption  
AS – absorption spectroscopy  
CCD – charge coupled detector  
CIMS – chemical ionization mass spectroscopy/spectrometry  
CL – chemiluminescence  
CRDS – cavity ring-down spectroscopy  
DF – discharge flow  
EPR – electron paramagnetic resonance  
F – flow system  
FP – flash photolysis  
FTIR – Fourier transform infrared  
FTS – Fourier transform spectroscopy  
GC – gas chromatography/gas chromatographic  
HPLC – high-performance liquid chromatography  
IR – infrared  
LIF – laser induced fluorescence  
LMR – laser magnetic resonance  
LP – laser photolysis  
MM – molecular modulation  
MS – mass spectrometry/mass spectrometric  
P – steady state photolysis  
PLP – pulsed laser photolysis  
PR – pulse radiolysis  
RA – resonance absorption  
RF – resonance fluorescence  
RR – relative rate  
S – static system  
TDLS – tunable diode laser spectroscopy  
UV – ultraviolet  
UVA – ultraviolet absorption  
VUVA – vacuum ultraviolet absorption
