# Supplementary material for: Evaluated kinetic and photochemical data for atmospheric chemistry: Volume VII – Criegee intermediates
Source: Copernicus journal article supplement (doi:10.5194/acp-20-13497-2020), 2020-11-12
Supplement: Supplementary file 5 [file acp-20-13497-2020-supplement.zip]

Archive with 4 entries (4 files):
- Supplement B - sCI reactions.pdf
- acp-20-13497-2020-supplement-title-page.pdf
- Supplement C - ambient calculations.pdf
- Supplement A - alkene + ozone reactions.pdf
